# Supplementary material
Source: ML conference proceedings conference paper supplement (https://openreview.net/forum?id=dGi2d5yDs4)

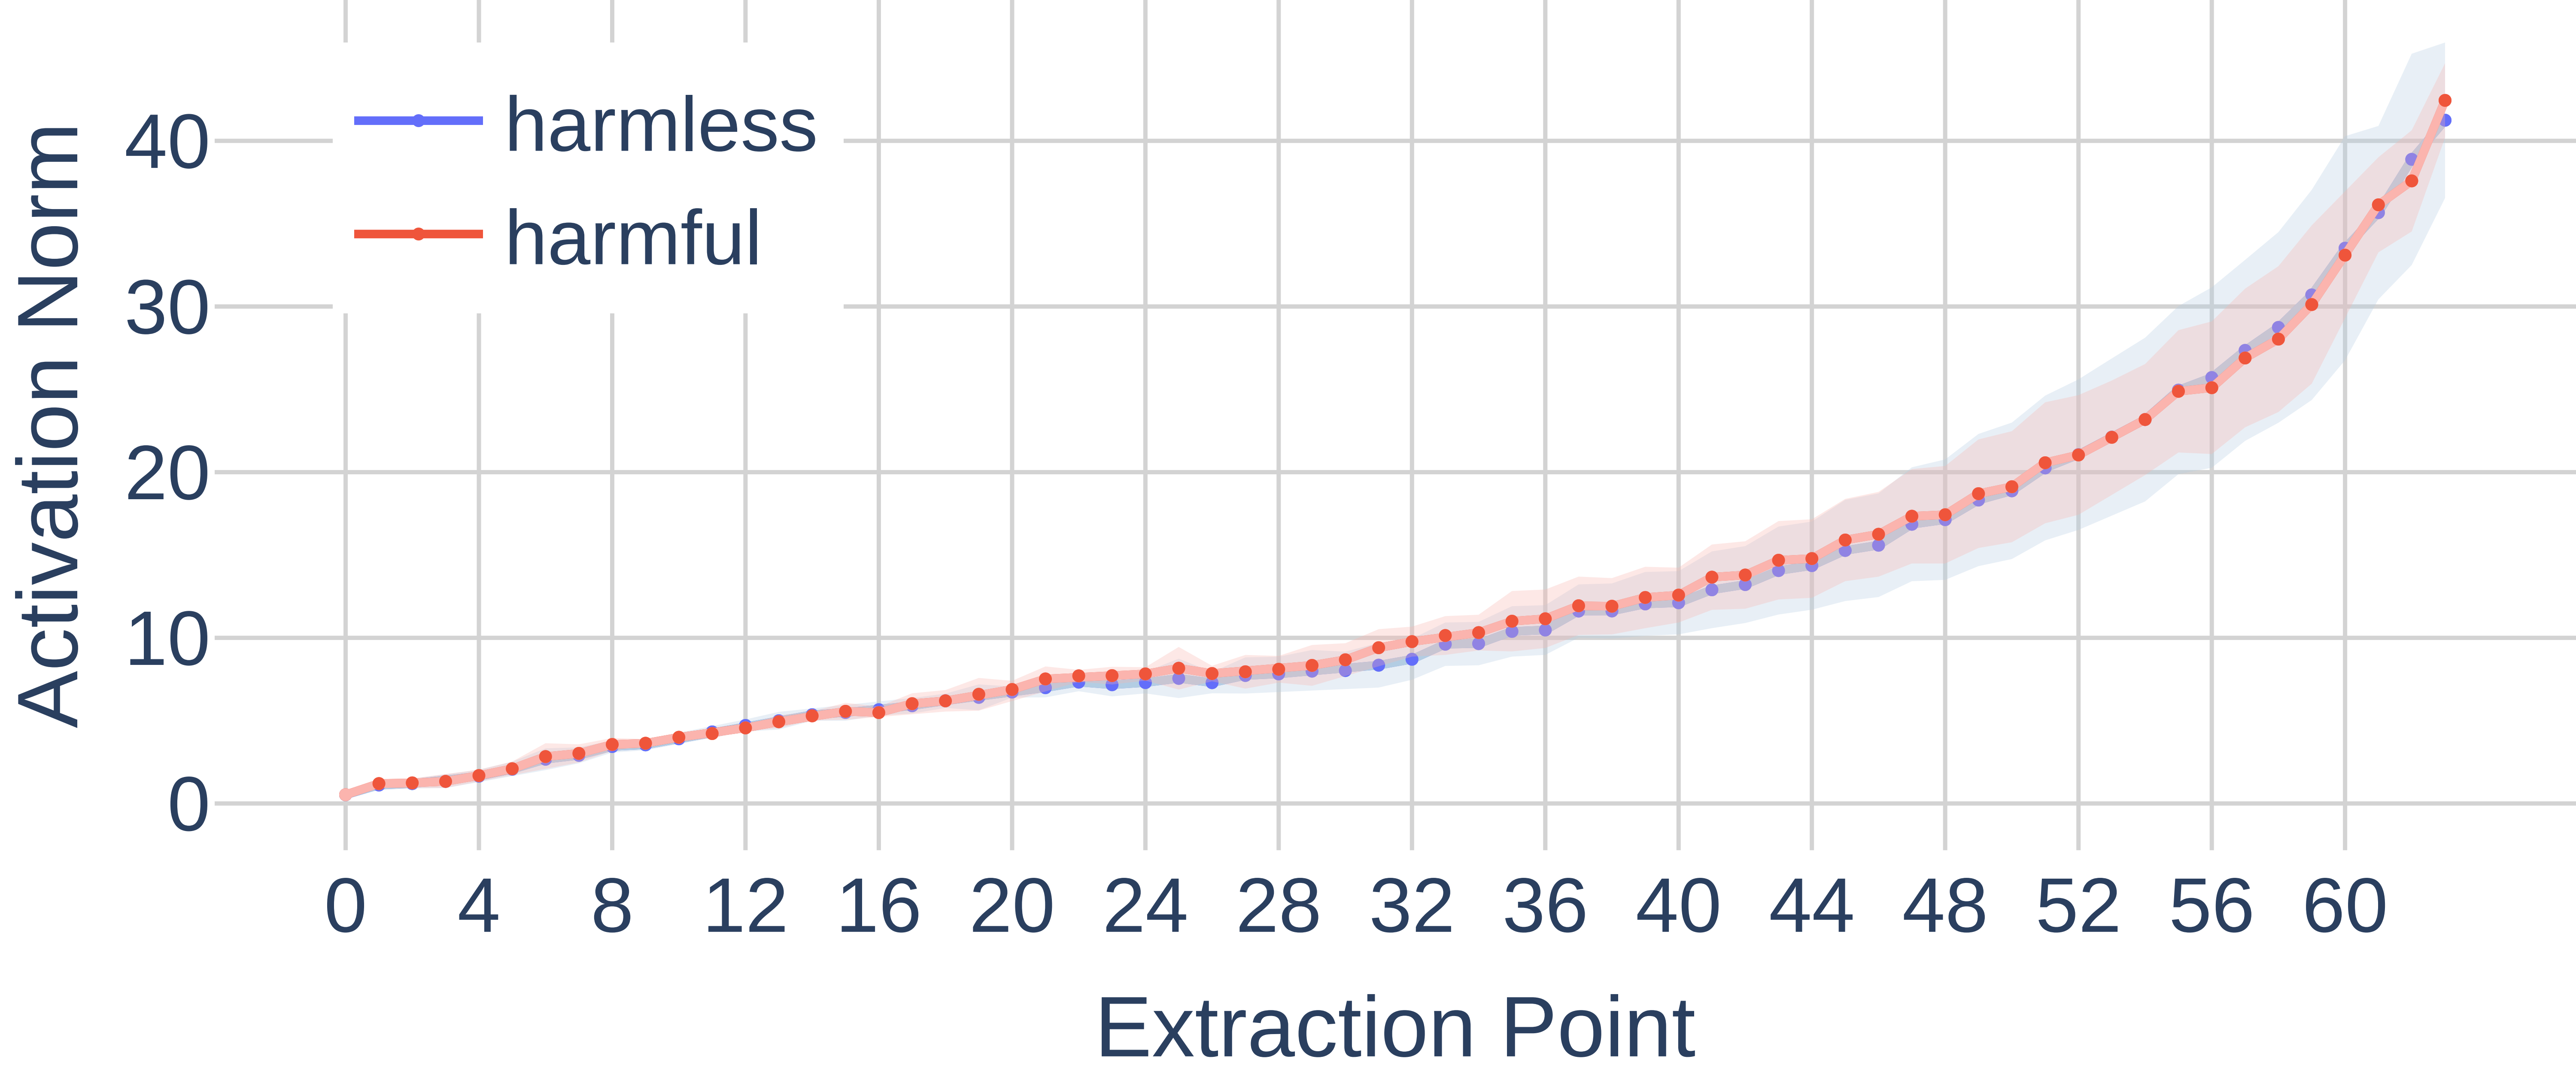

Supplement: supplementary_material [file acts_norm.pdf › angular_steering/angular_steering/visualization/Llama-3.1-8B-Instruct/acts_norm.pdf]

Mean  
Cosine Score

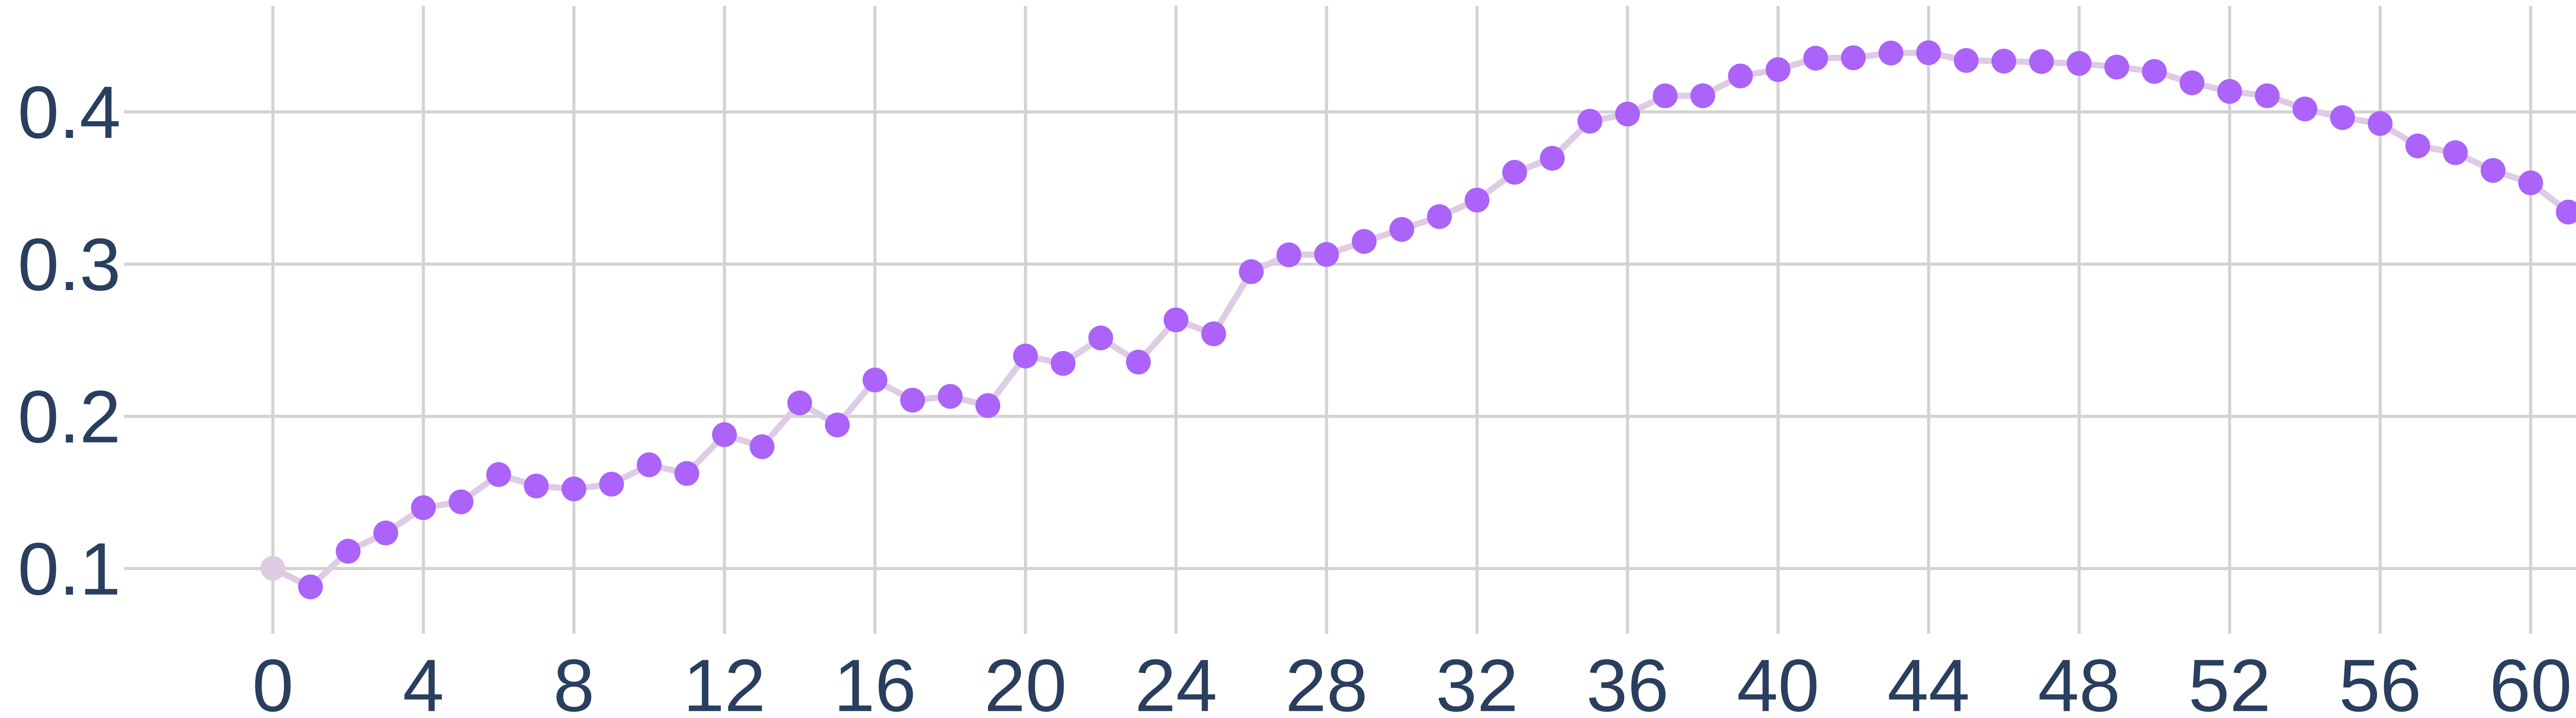

Extraction Point

Supplement: supplementary_material [file mean_cosine.pdf › angular_steering/angular_steering/visualization/Llama-3.1-8B-Instruct/mean_cosine.pdf]

Norm of  
Refusal Direction

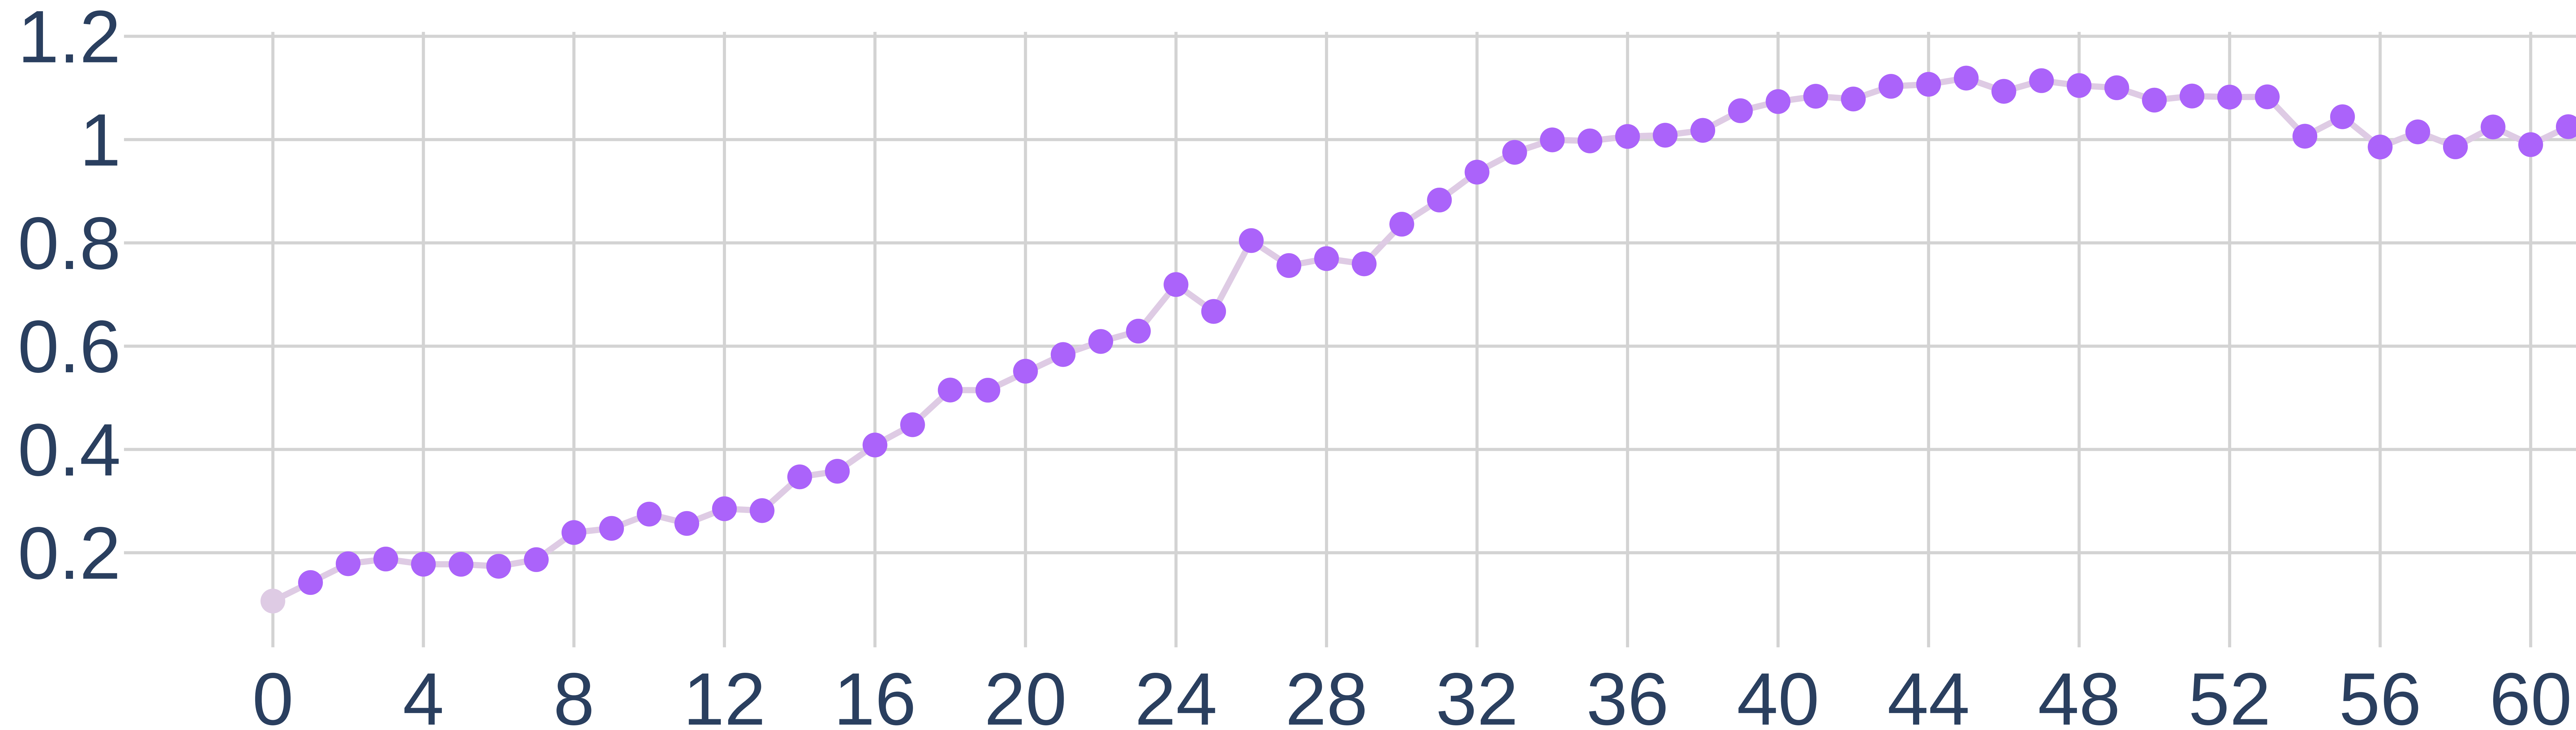

Extraction Point

Supplement: supplementary_material [file norm_refusal.pdf › angular_steering/angular_steering/visualization/Llama-3.1-8B-Instruct/norm_refusal.pdf]

Scalar Projections

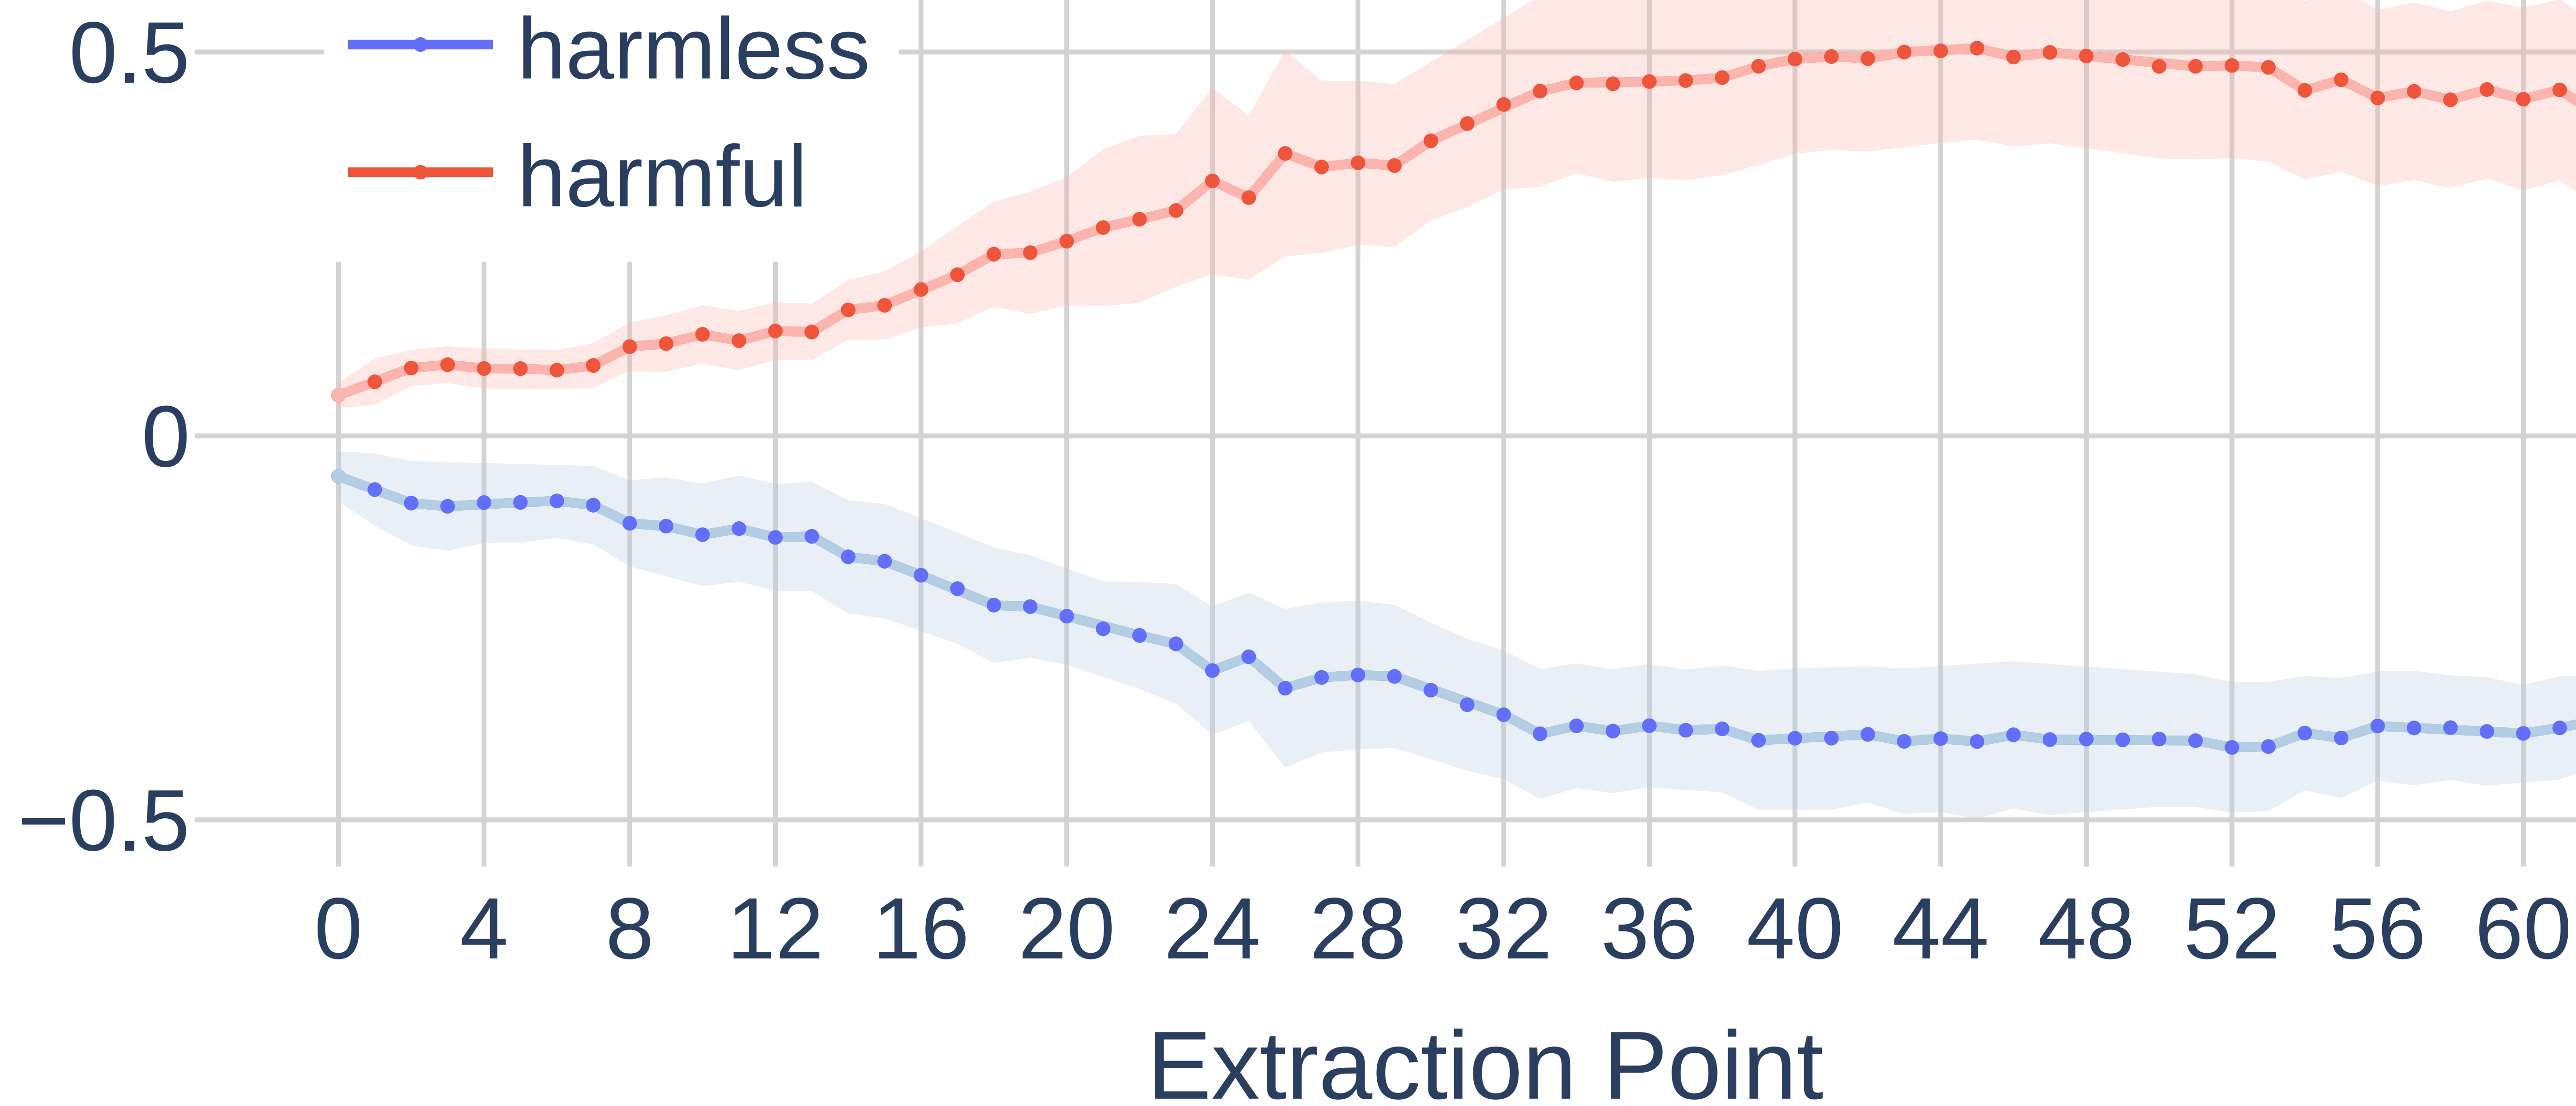

Supplement: supplementary_material [file prj_onto_local_refusal_candidates.pdf › angular_steering/angular_steering/visualization/Llama-3.1-8B-Instruct/prj_onto_local_refusal_candidates.pdf]

Scalar Projections

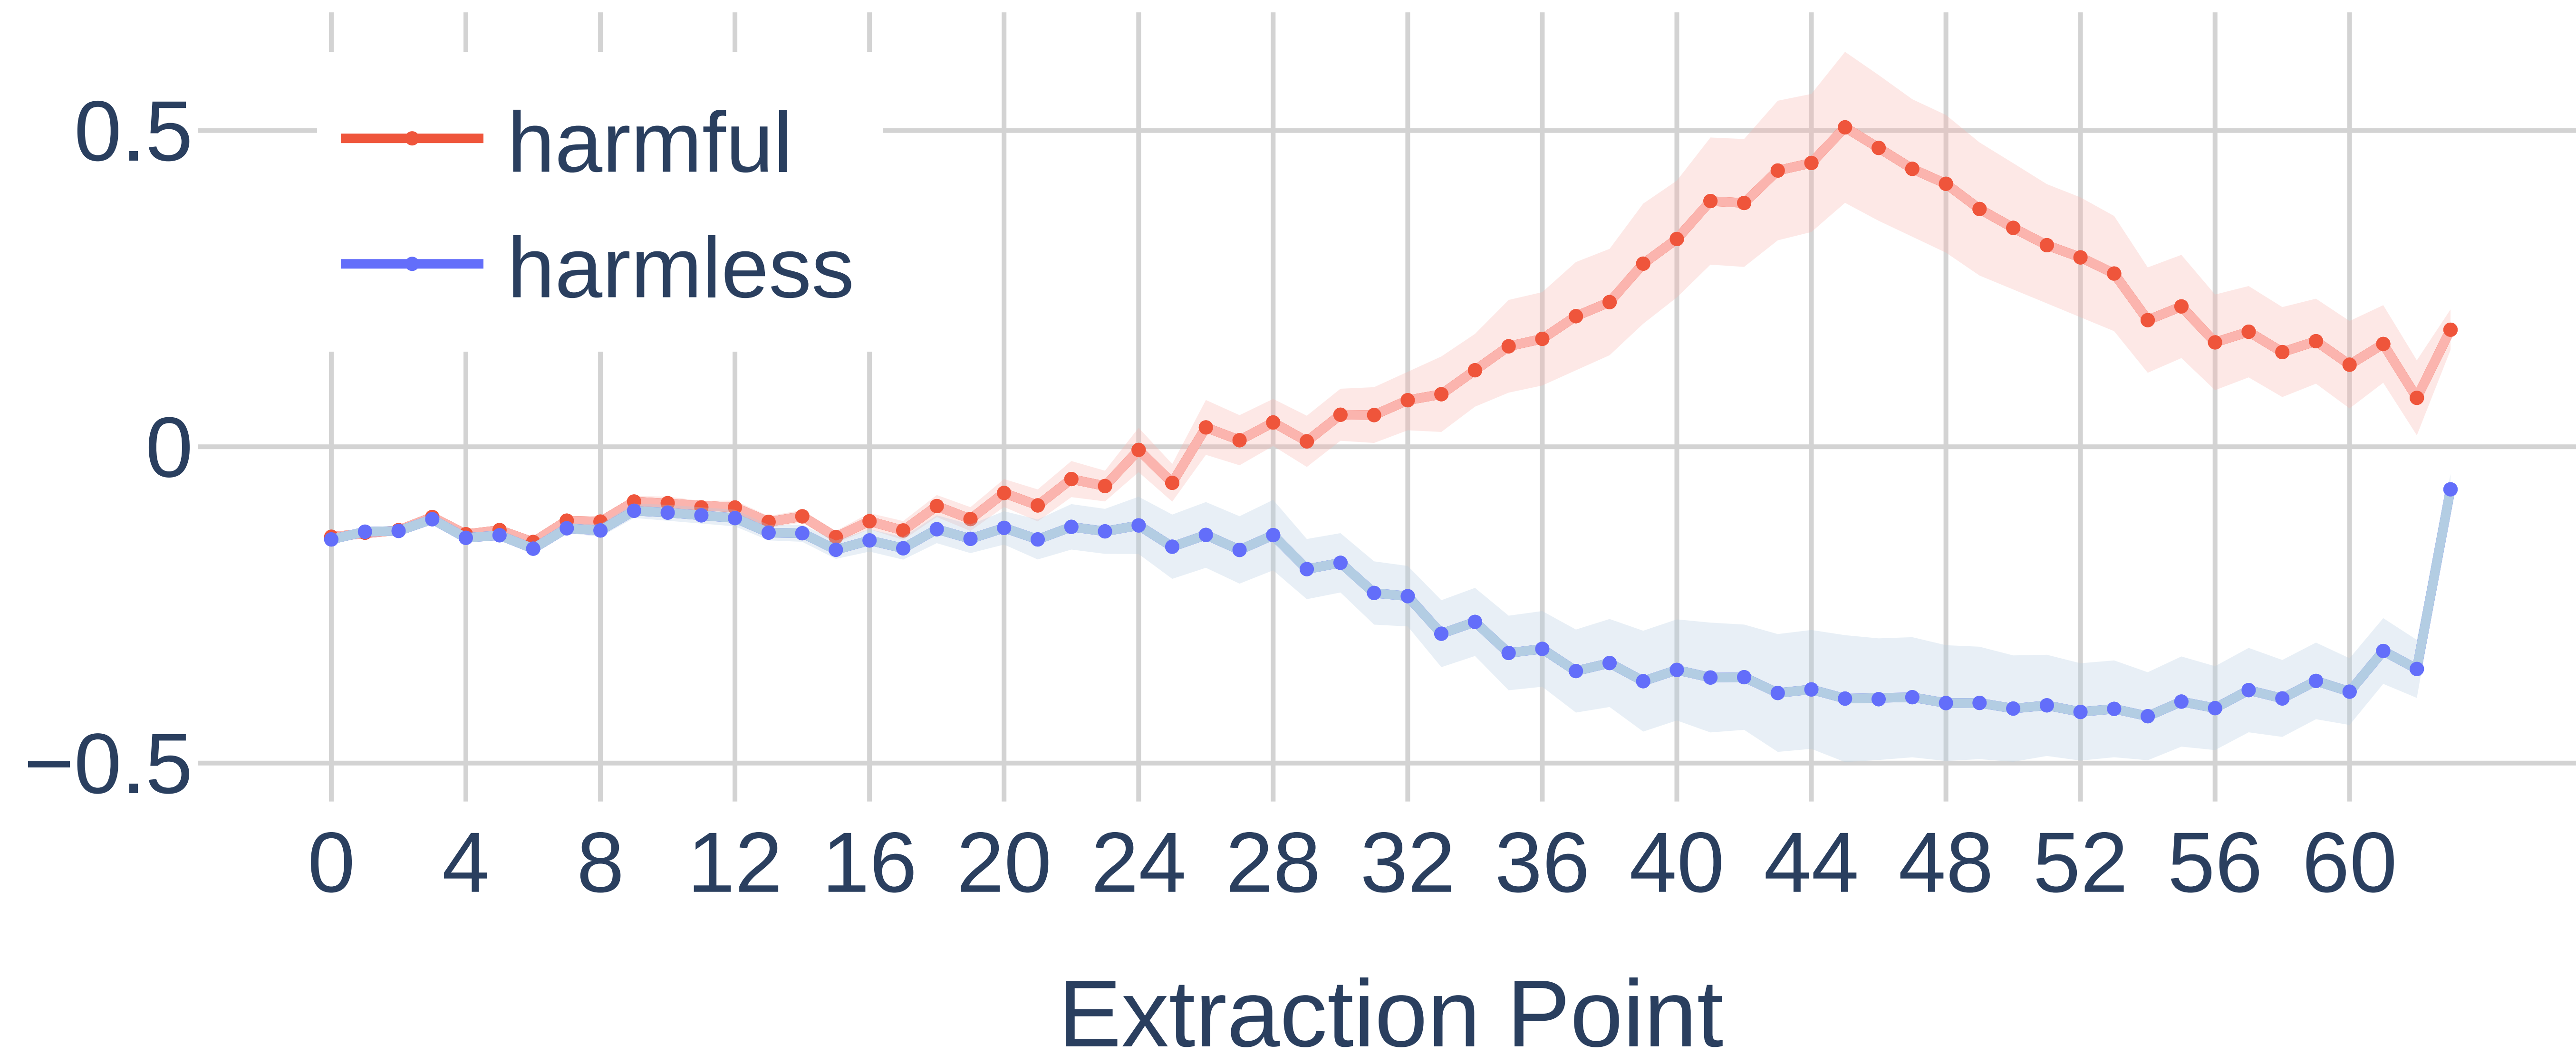

Supplement: supplementary_material [file prj_onto_refusal_dir.pdf › angular_steering/angular_steering/visualization/Llama-3.1-8B-Instruct/prj_onto_refusal_dir.pdf]

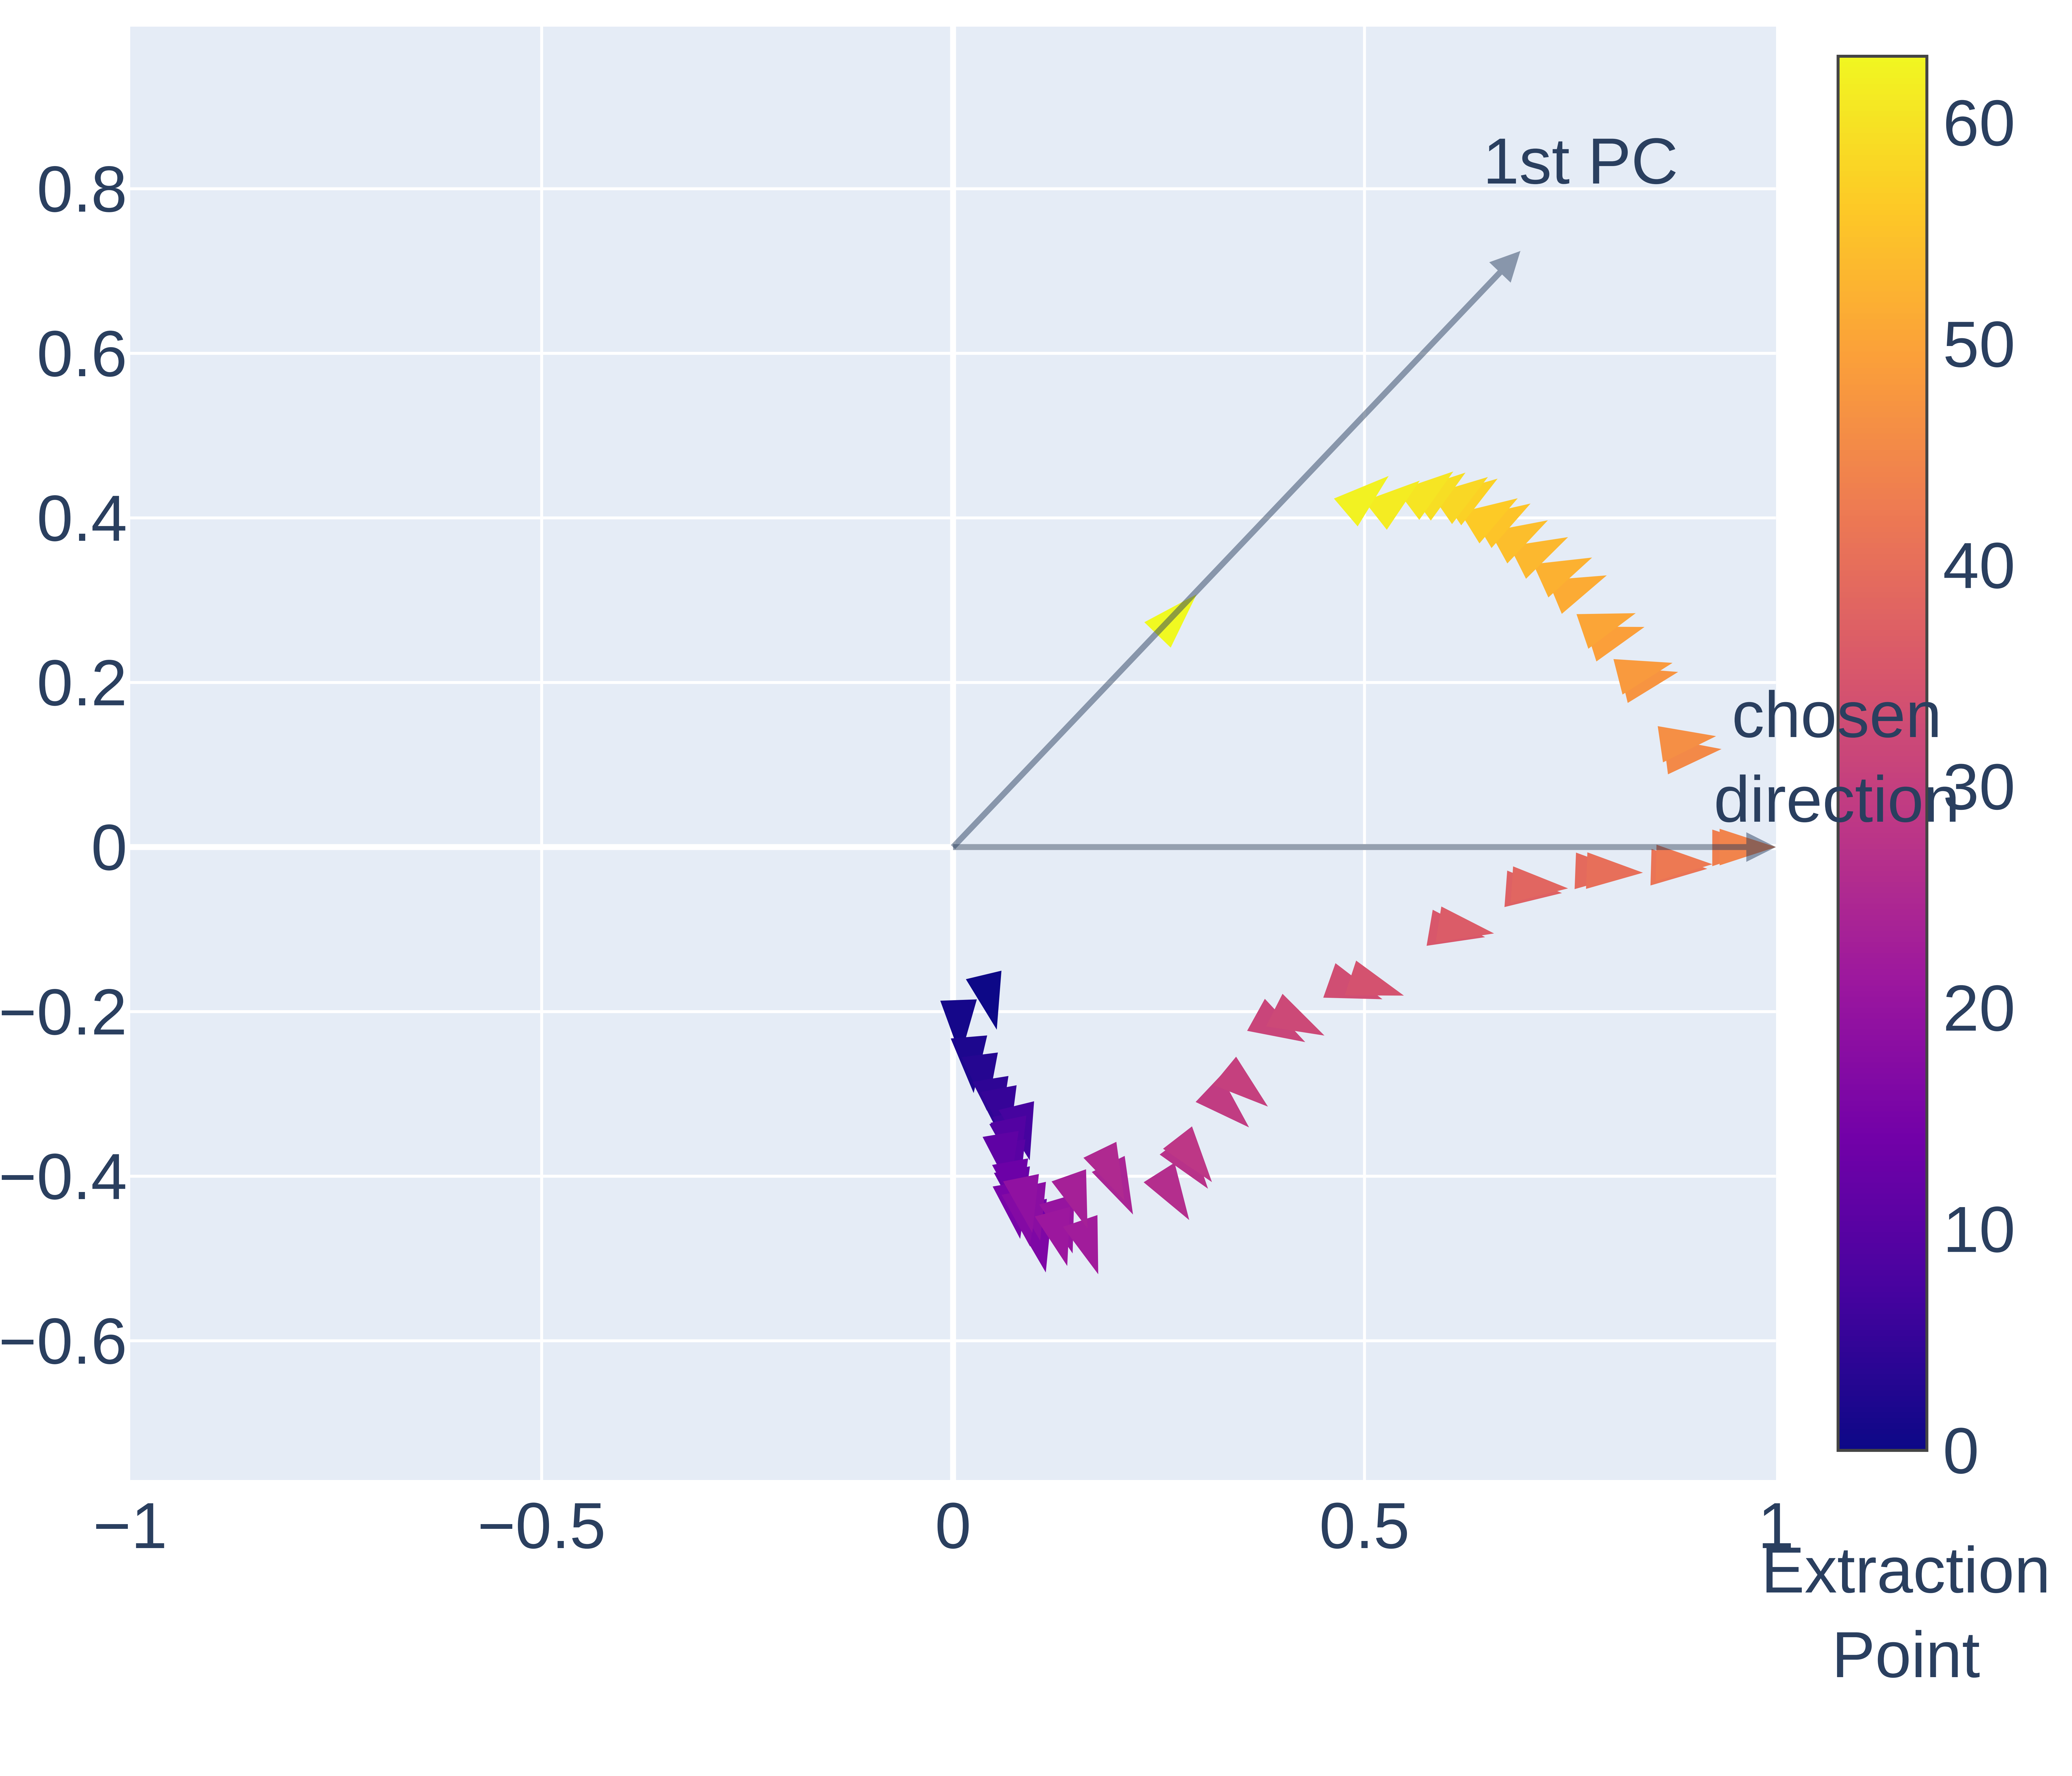

Supplement: supplementary_material [file steering_plane.pdf › angular_steering/angular_steering/visualization/Llama-3.1-8B-Instruct/steering_plane.pdf]

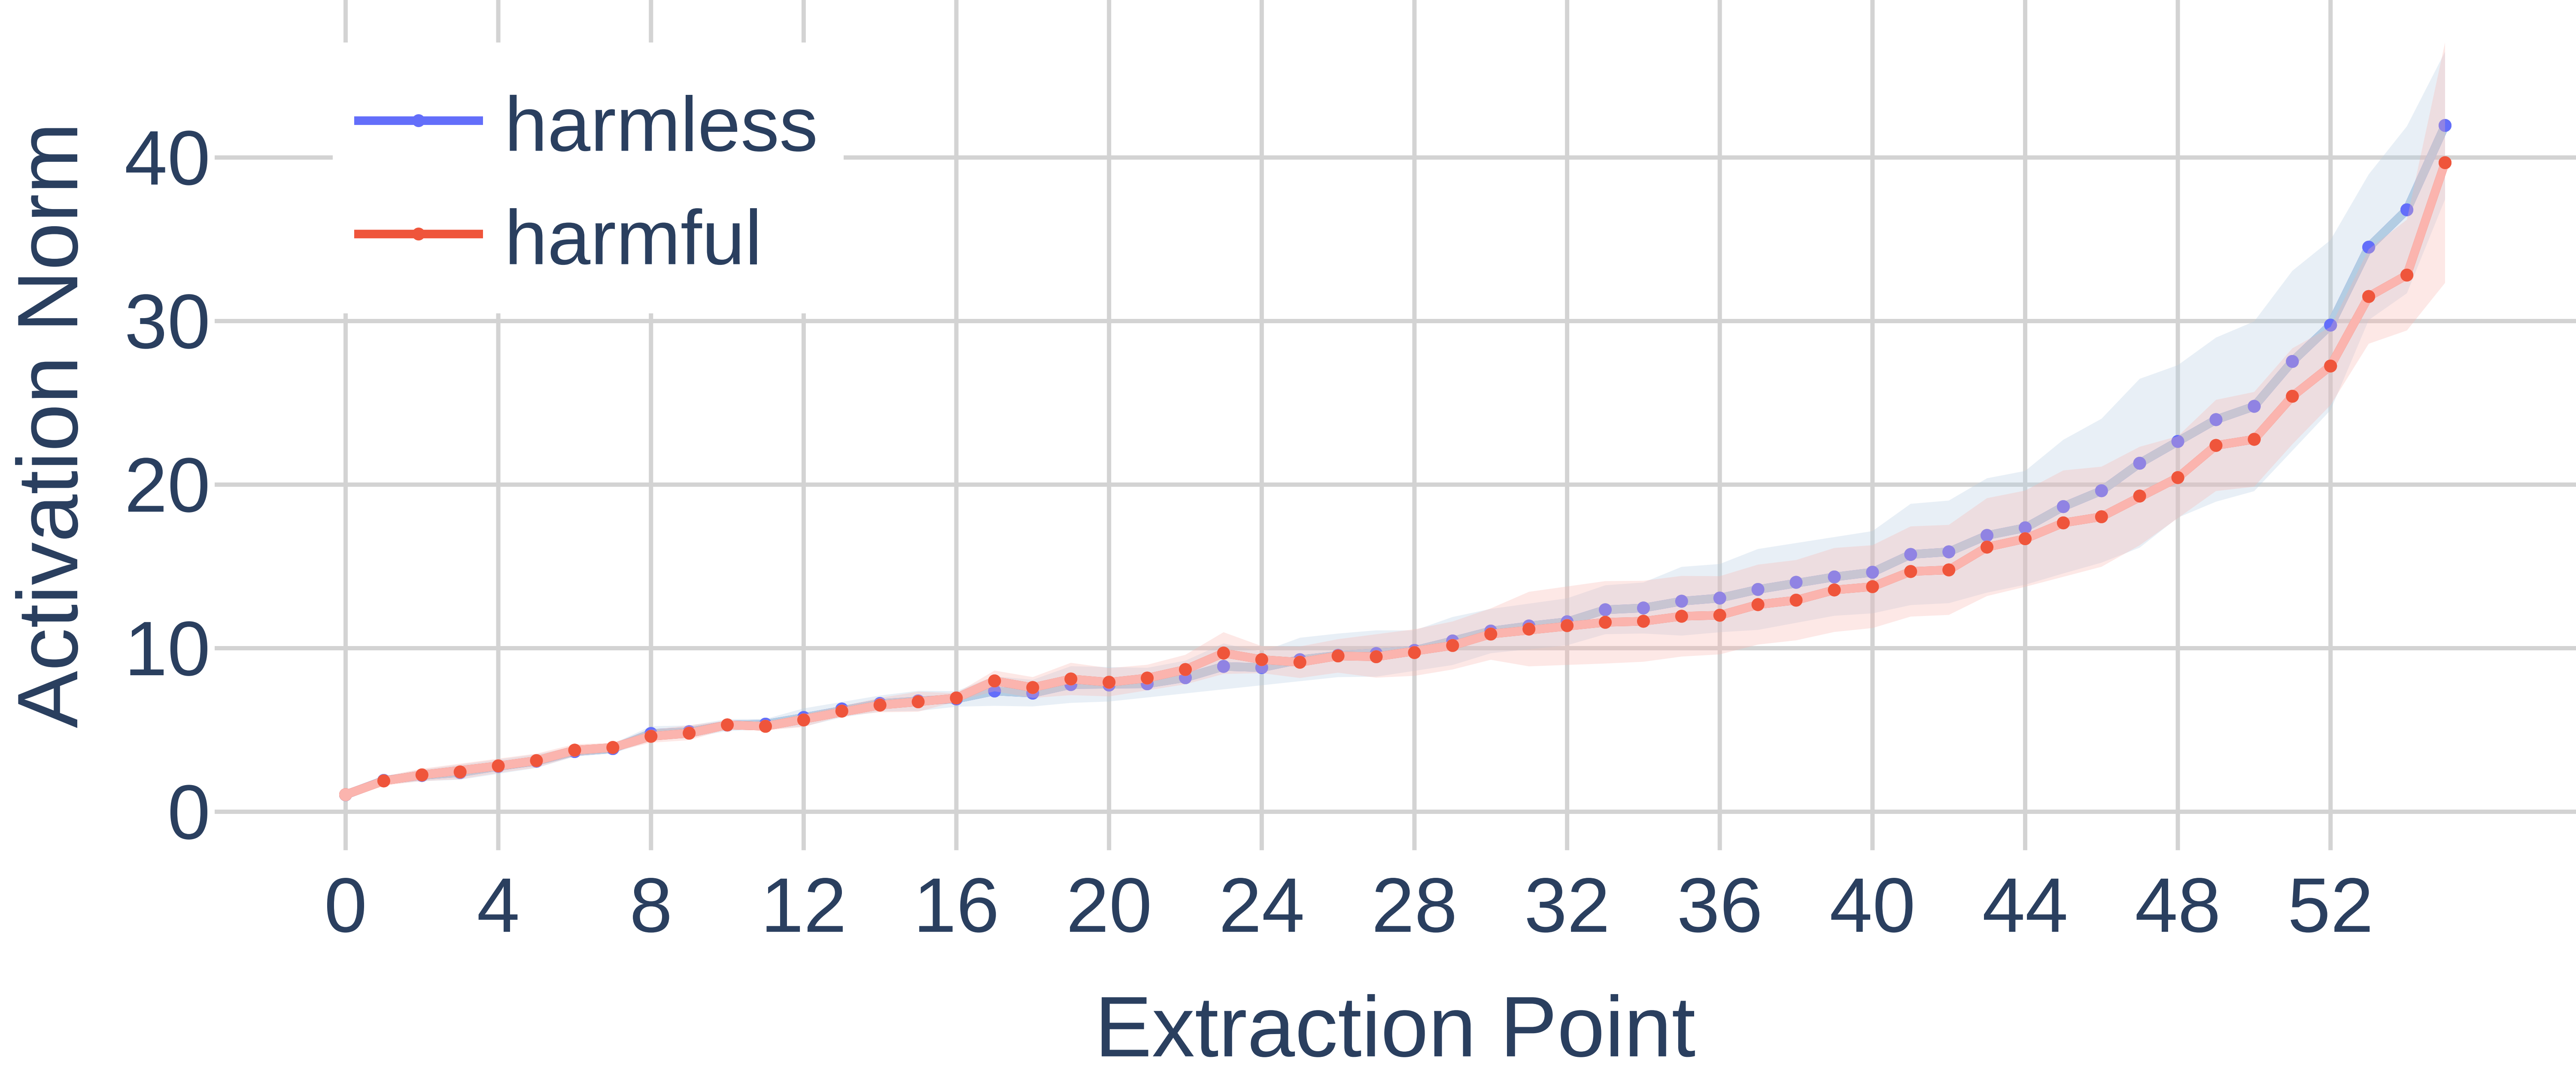

Supplement: supplementary_material [file acts_norm.pdf › angular_steering/angular_steering/visualization/Llama-3.2-3B-Instruct/acts_norm.pdf]

Mean  
Cosine Score

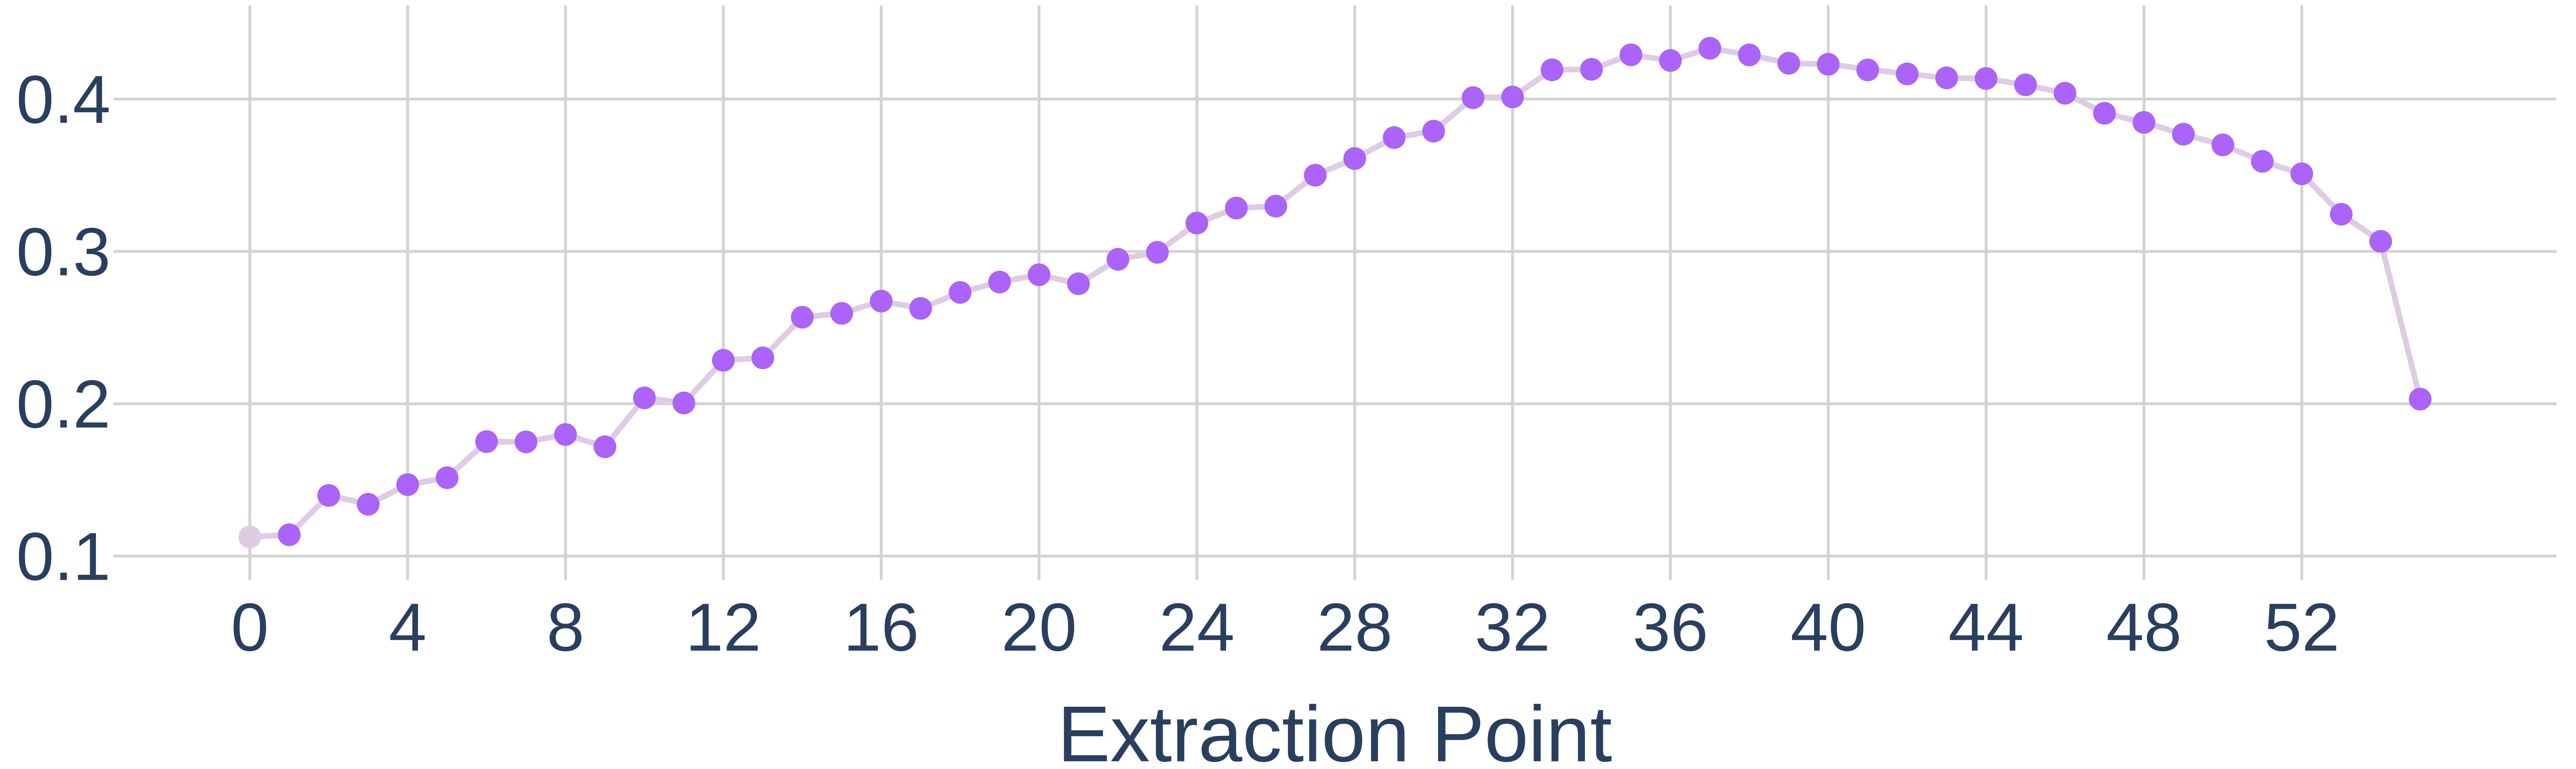

Supplement: supplementary_material [file mean_cosine.pdf › angular_steering/angular_steering/visualization/Llama-3.2-3B-Instruct/mean_cosine.pdf]

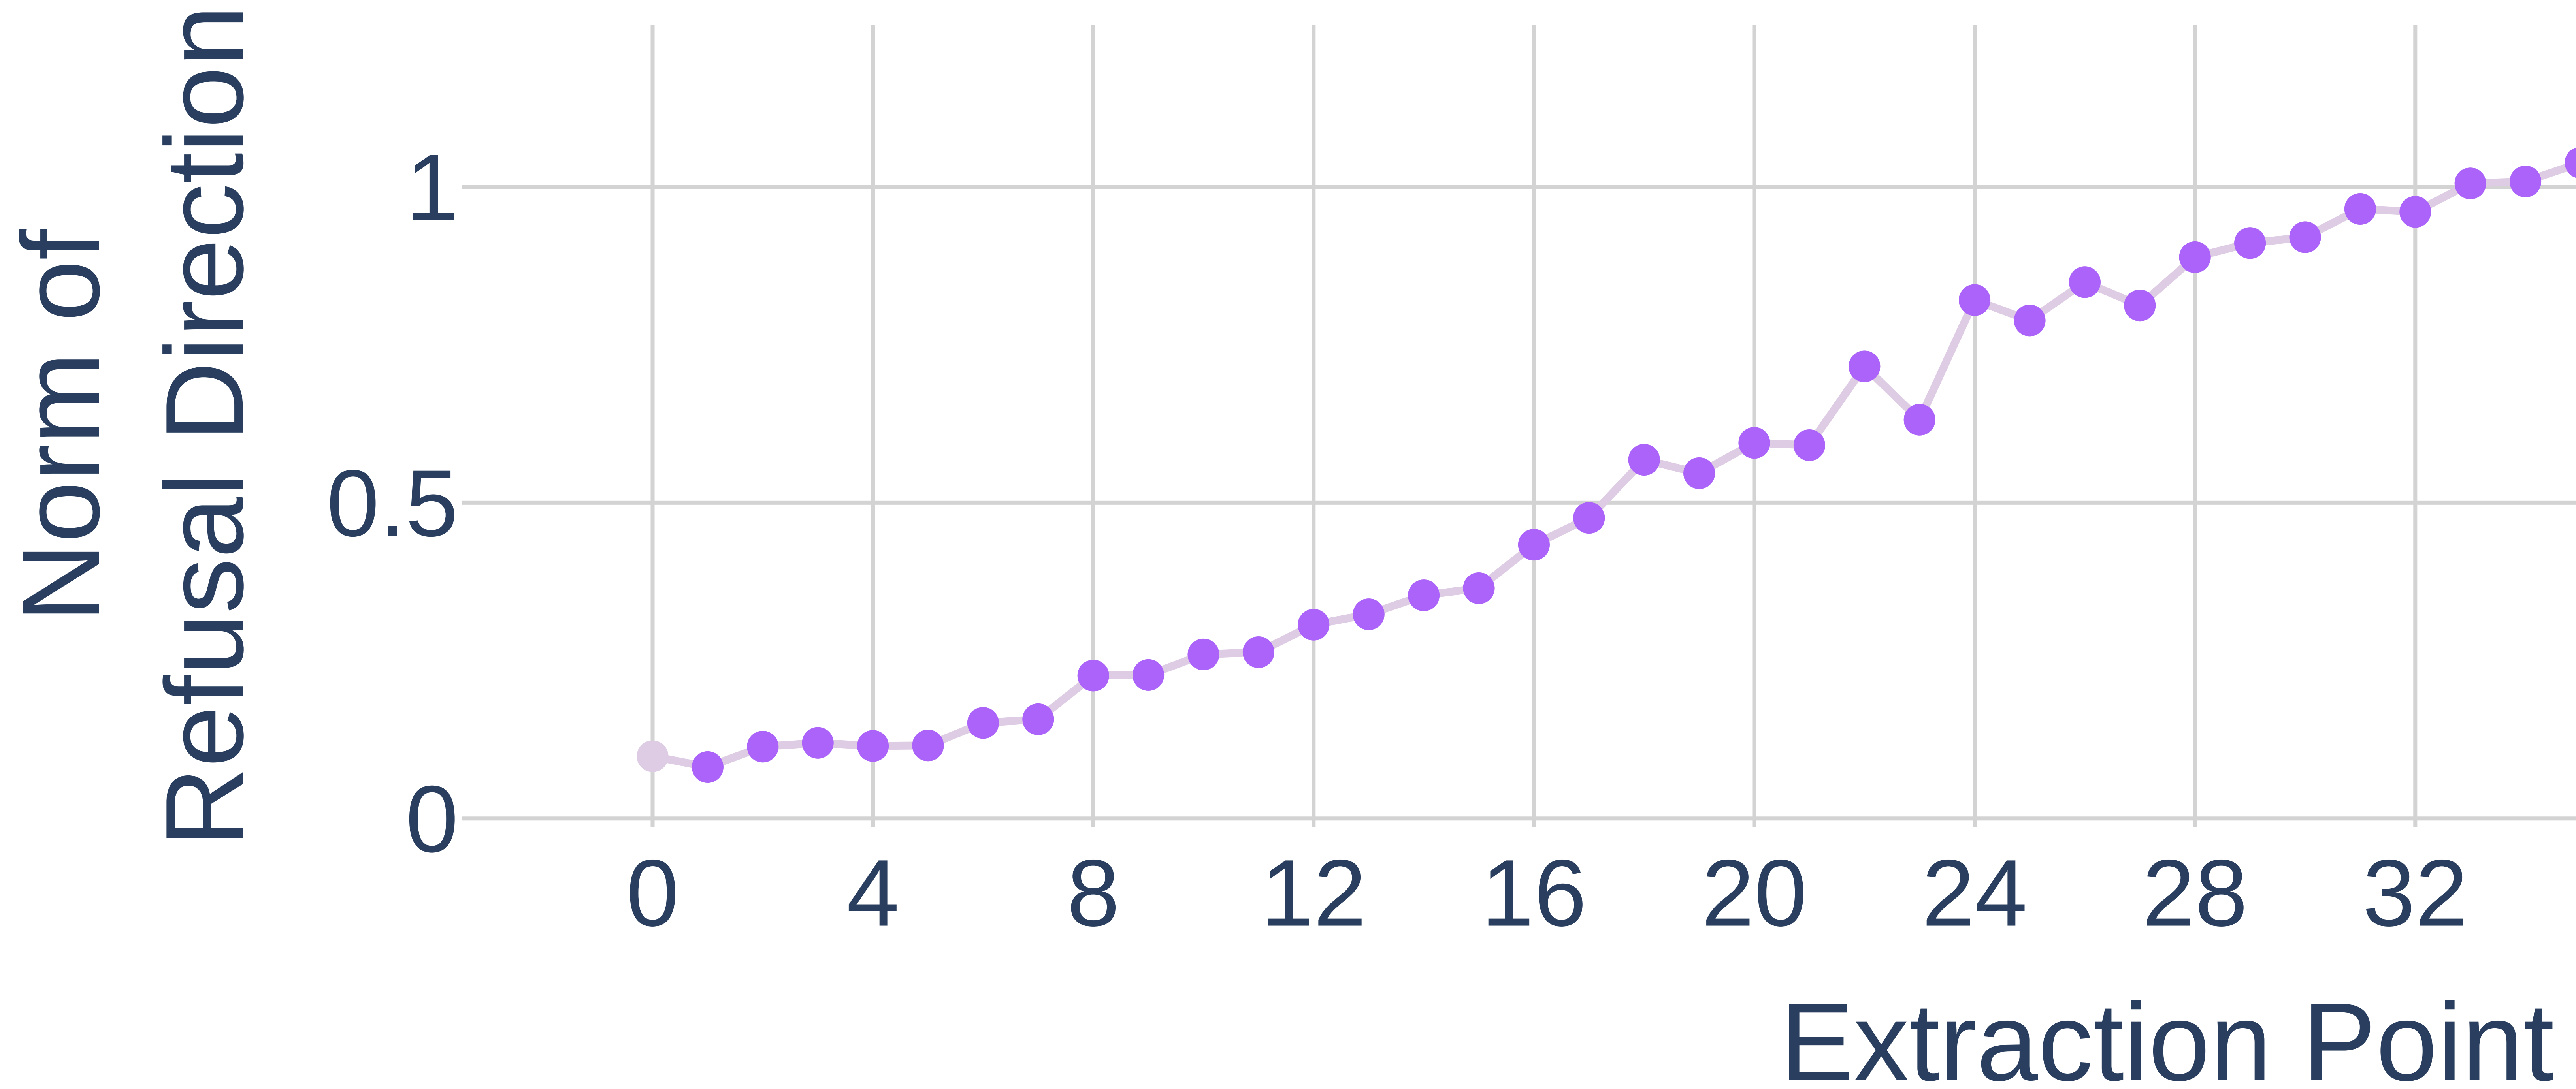

Supplement: supplementary_material [file norm_refusal.pdf › angular_steering/angular_steering/visualization/Llama-3.2-3B-Instruct/norm_refusal.pdf]

Scalar Projections

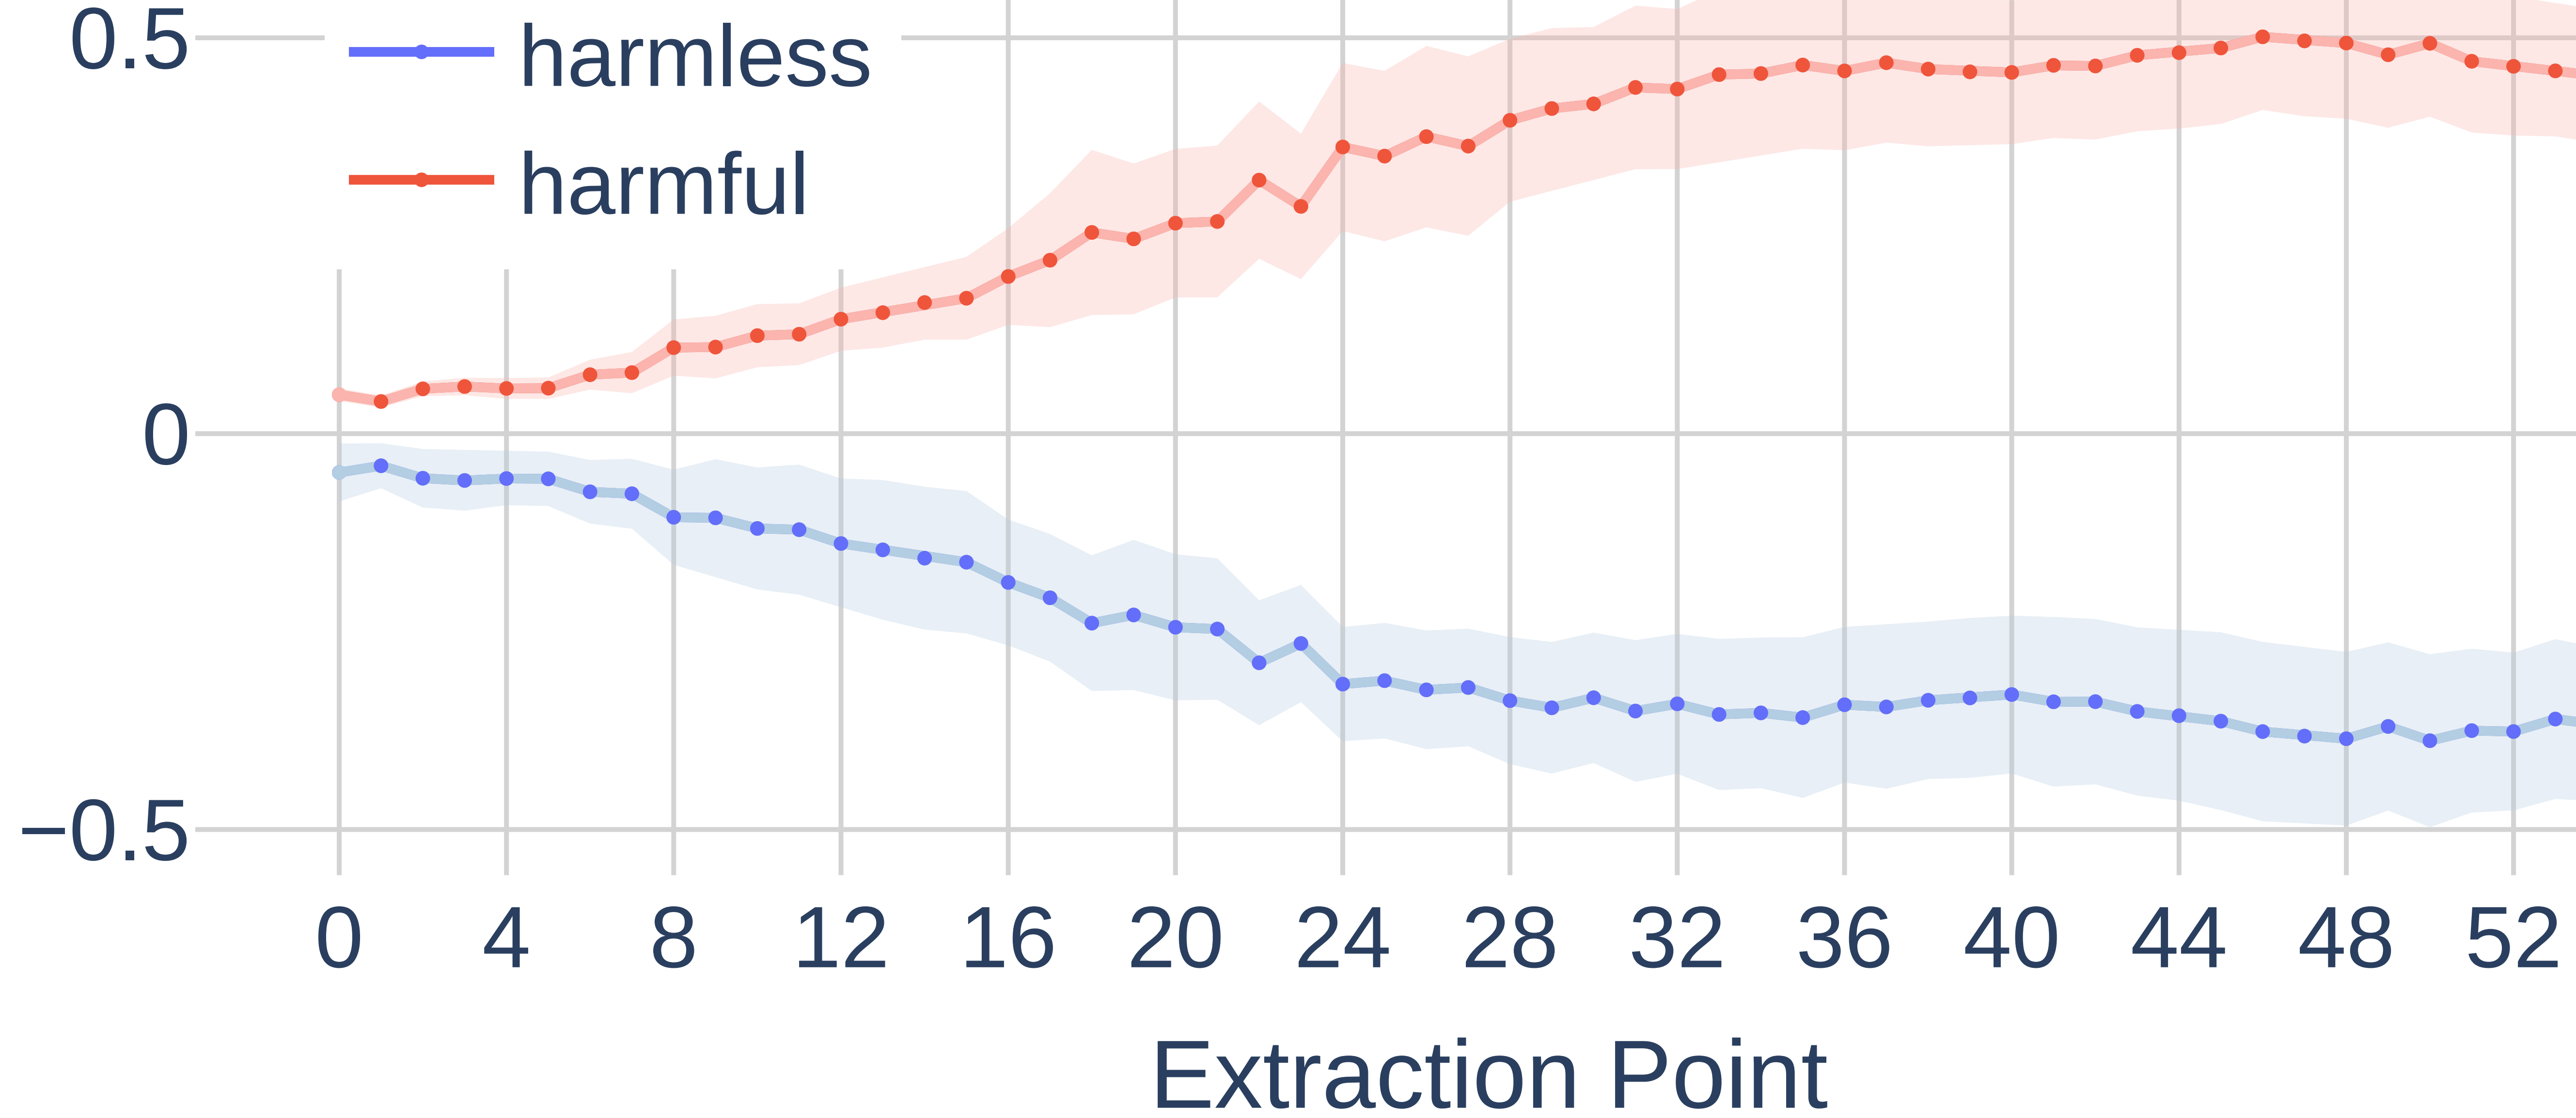

Supplement: supplementary_material [file prj_onto_local_refusal_candidates.pdf › angular_steering/angular_steering/visualization/Llama-3.2-3B-Instruct/prj_onto_local_refusal_candidates.pdf]

Scalar Projections

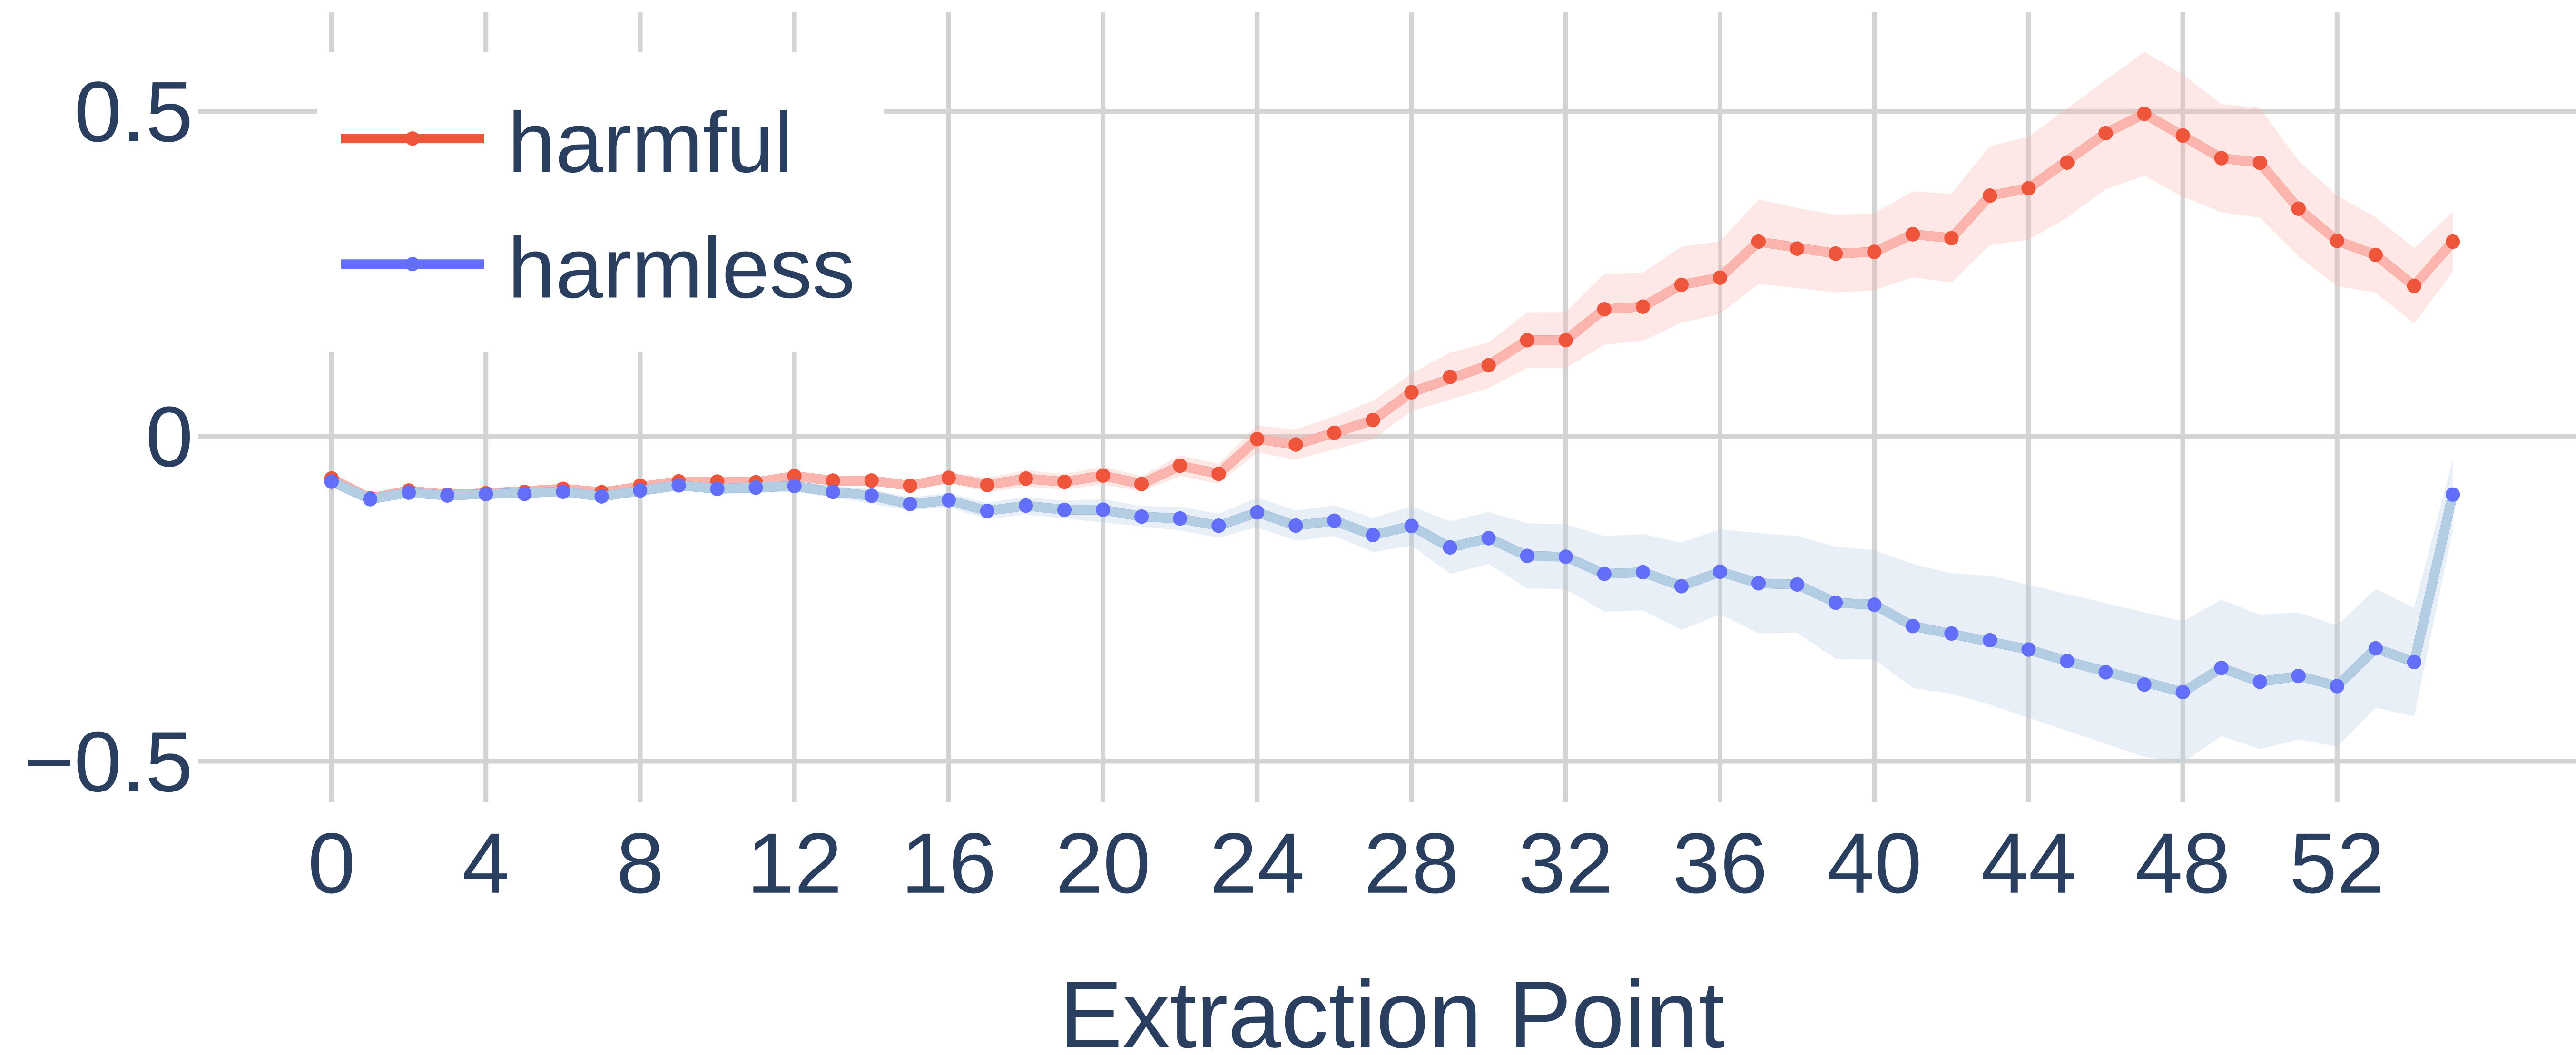

Supplement: supplementary_material [file prj_onto_refusal_dir.pdf › angular_steering/angular_steering/visualization/Llama-3.2-3B-Instruct/prj_onto_refusal_dir.pdf]

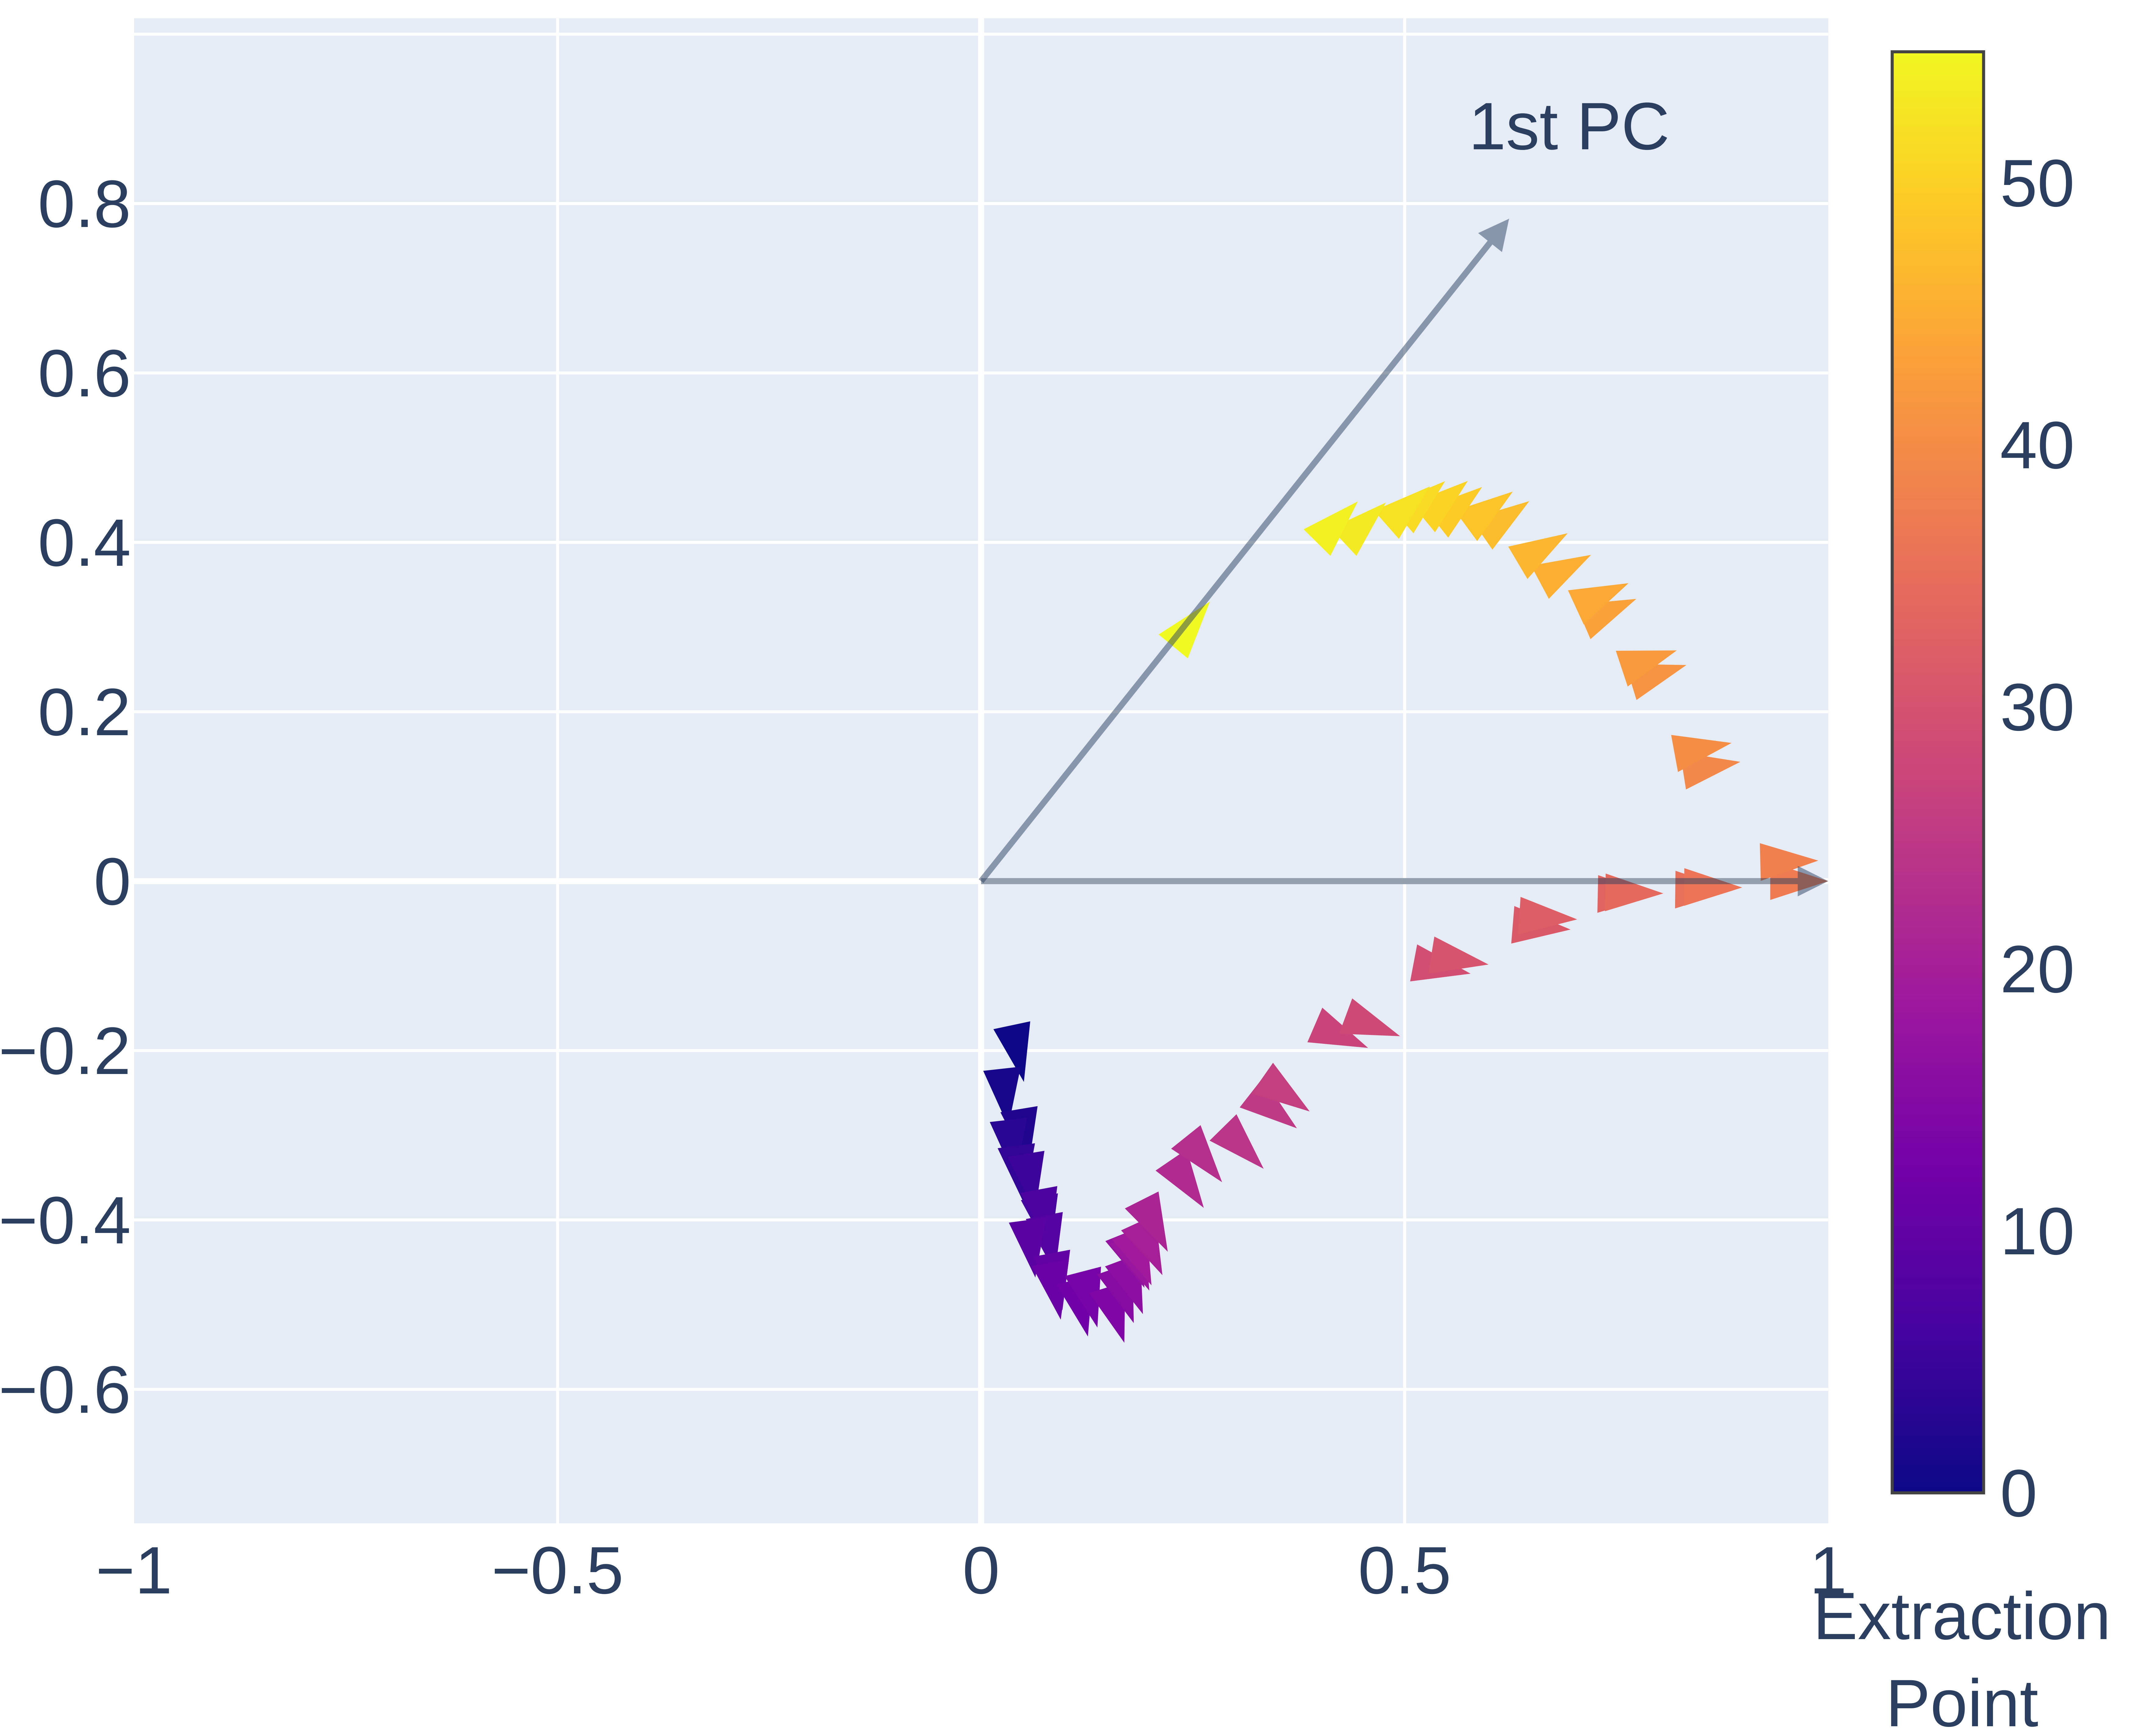

Supplement: supplementary_material [file steering_plane.pdf › angular_steering/angular_steering/visualization/Llama-3.2-3B-Instruct/steering_plane.pdf]

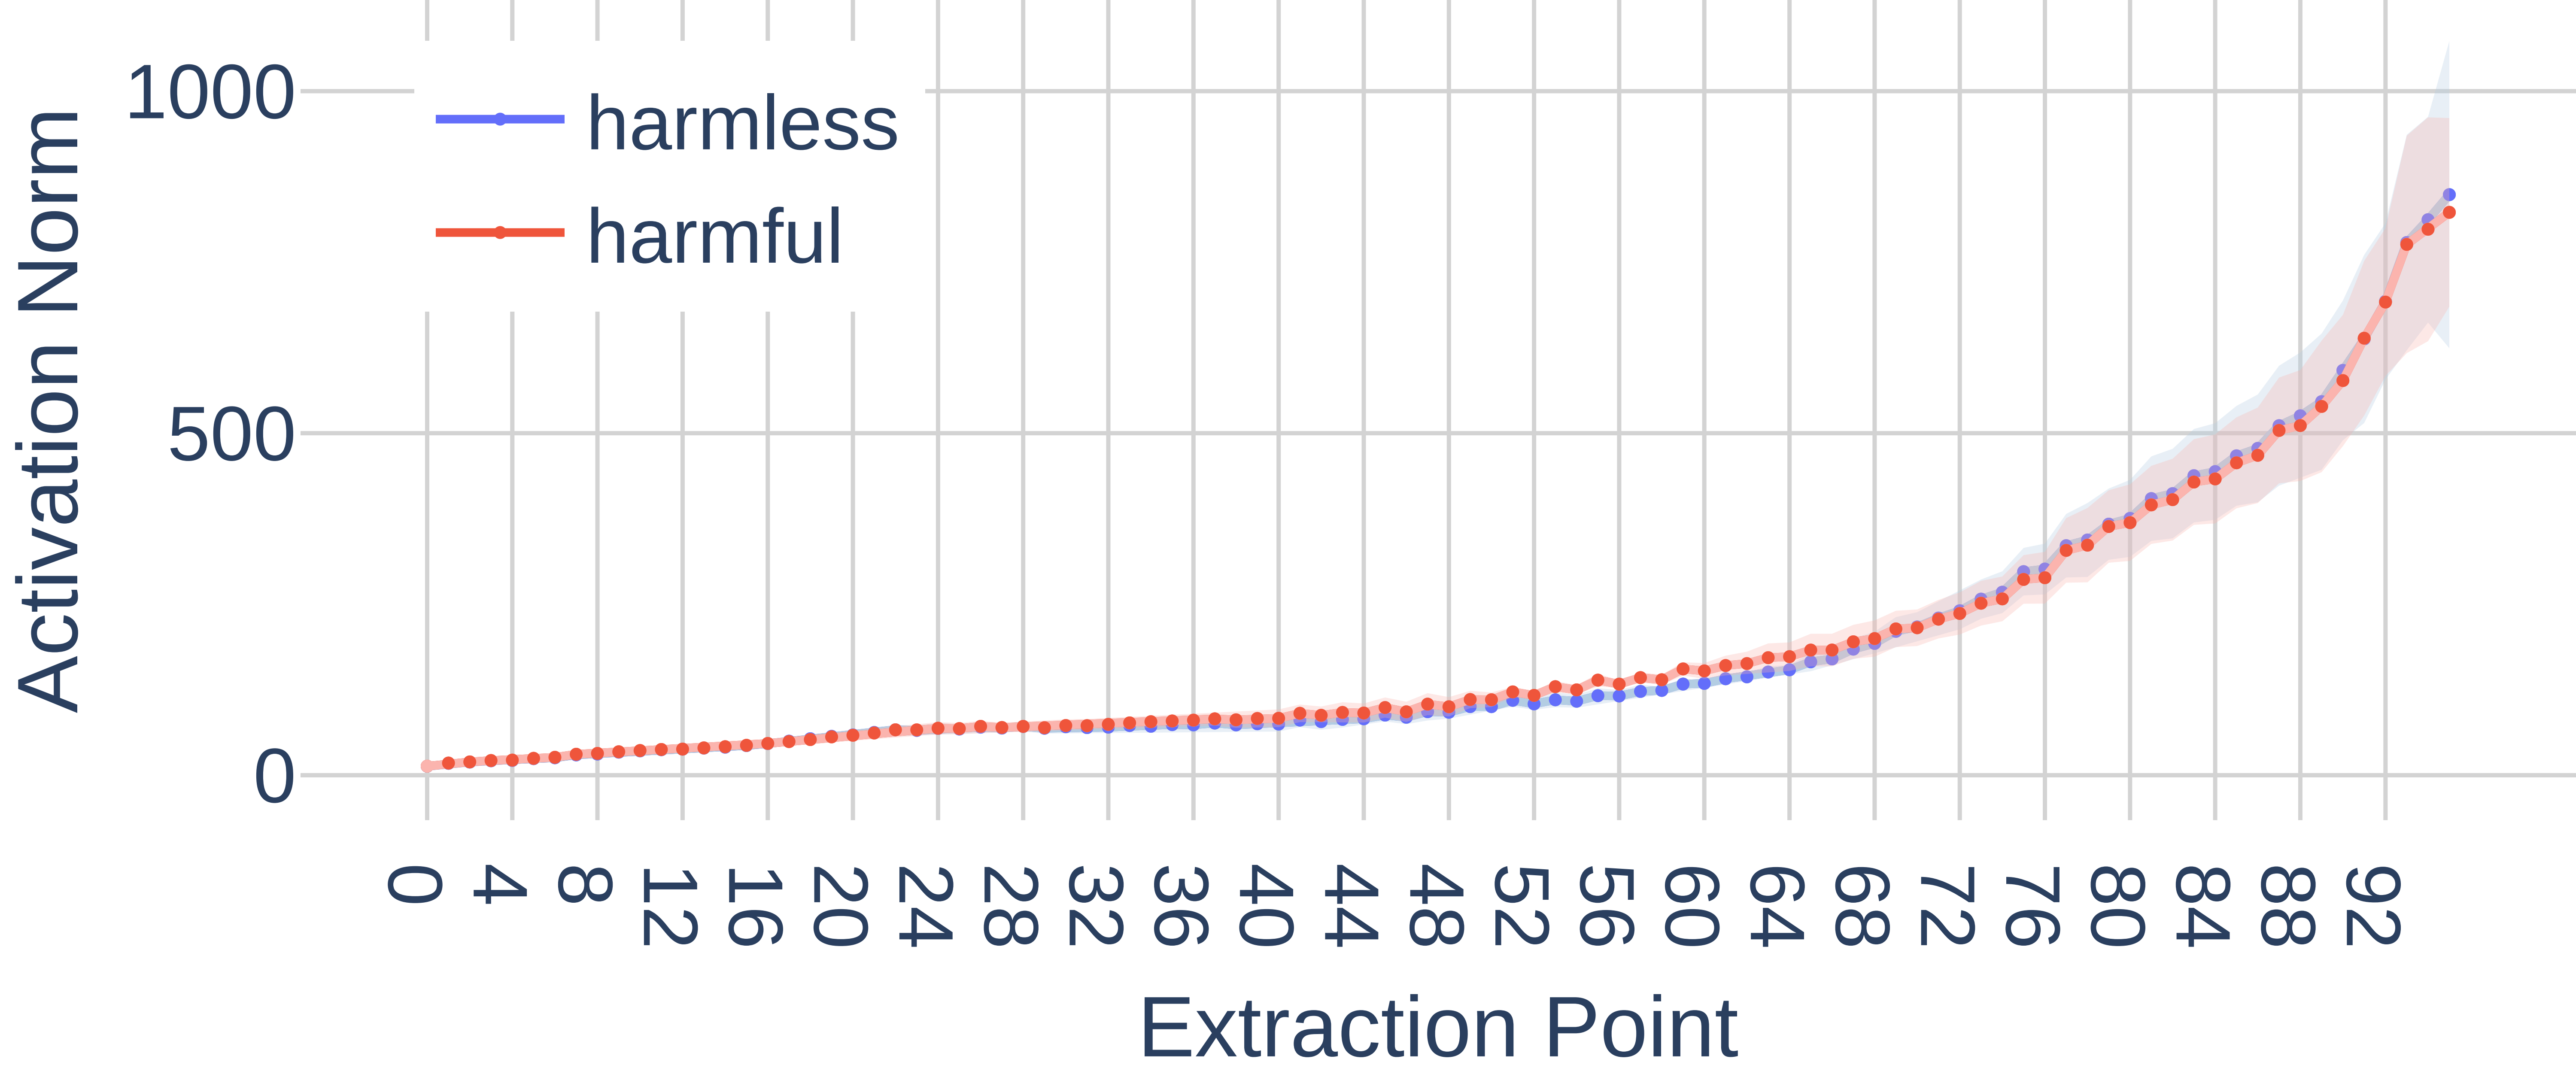

Supplement: supplementary_material [file acts_norm.pdf › angular_steering/angular_steering/visualization/Qwen2.5-14B-Instruct/acts_norm.pdf]

Mean  
Cosine Score

0.35  
0.3  
0.25  
0.2  
0.15

0 4 8 12 16 20 24 28 32 36 40 44 48 52 56 60 64 68 72 76 80 84 88 92

Extraction Point

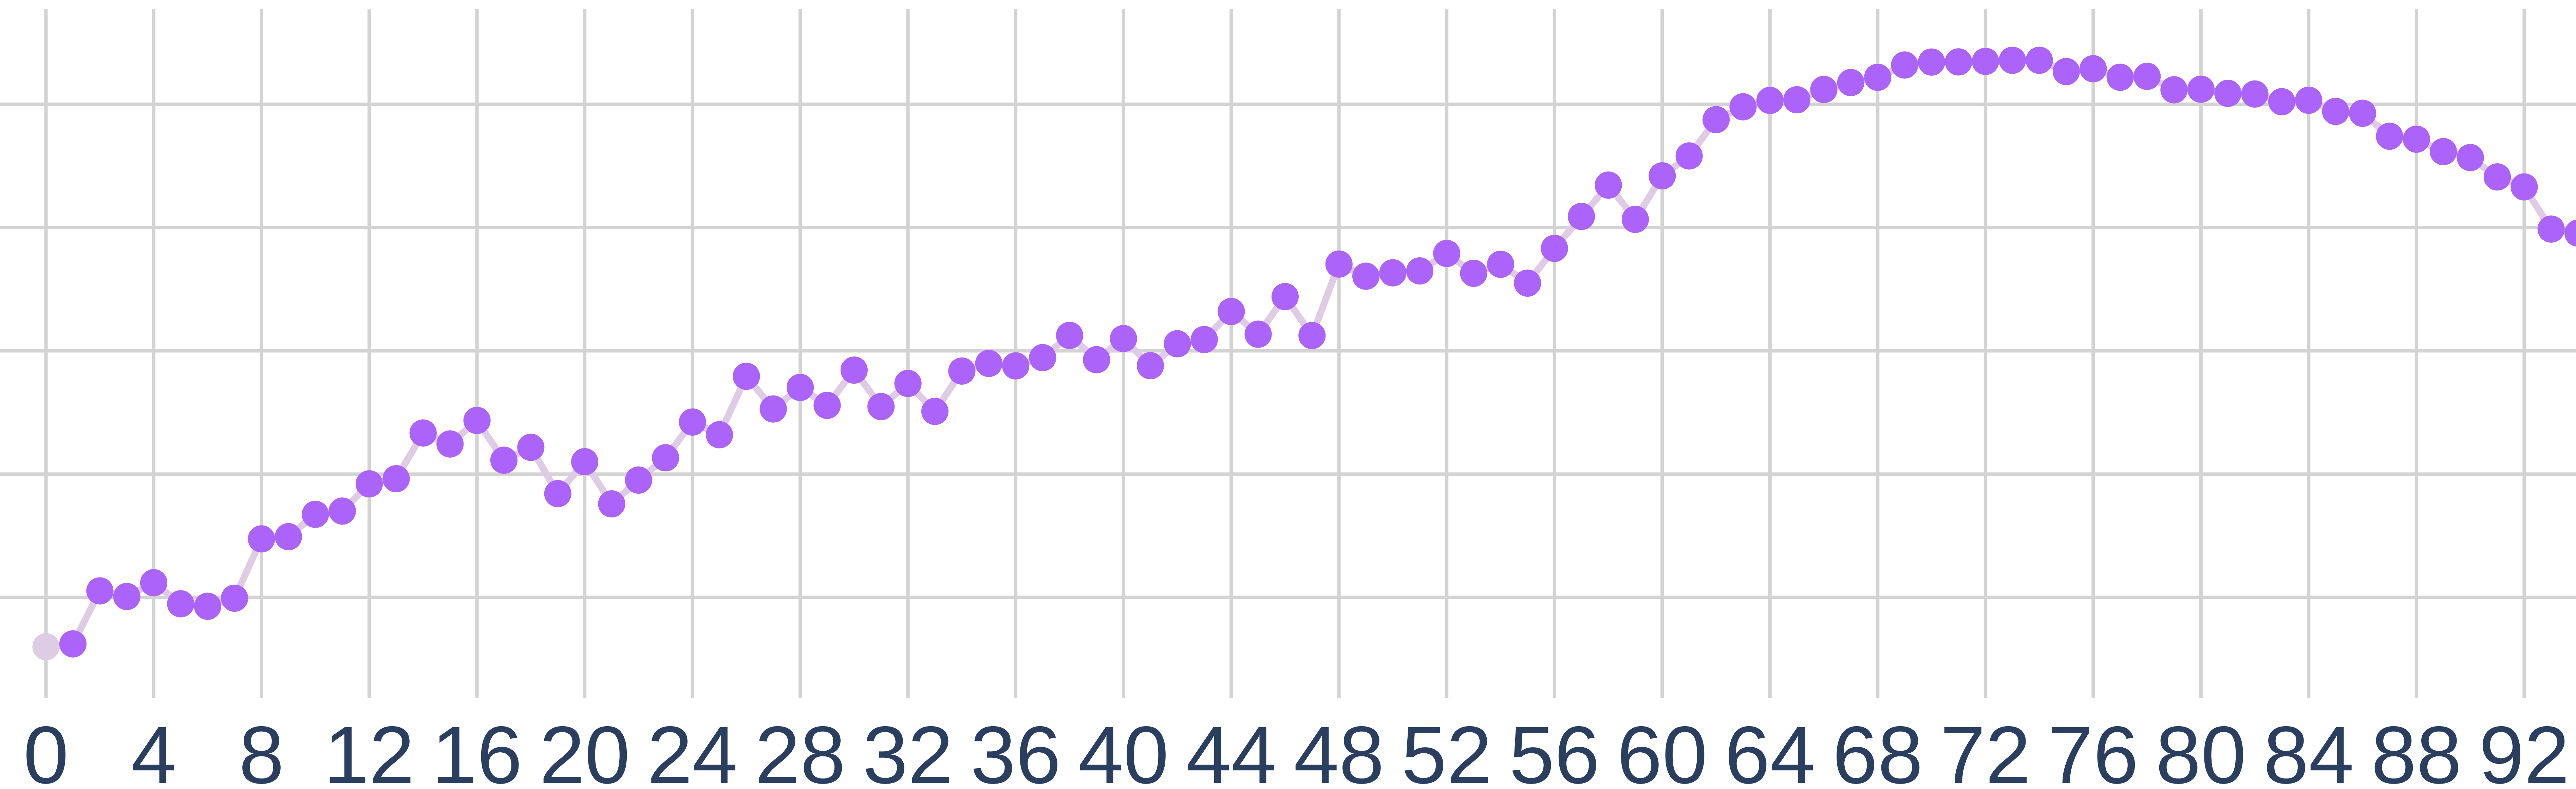

Supplement: supplementary_material [file mean_cosine.pdf › angular_steering/angular_steering/visualization/Qwen2.5-14B-Instruct/mean_cosine.pdf]

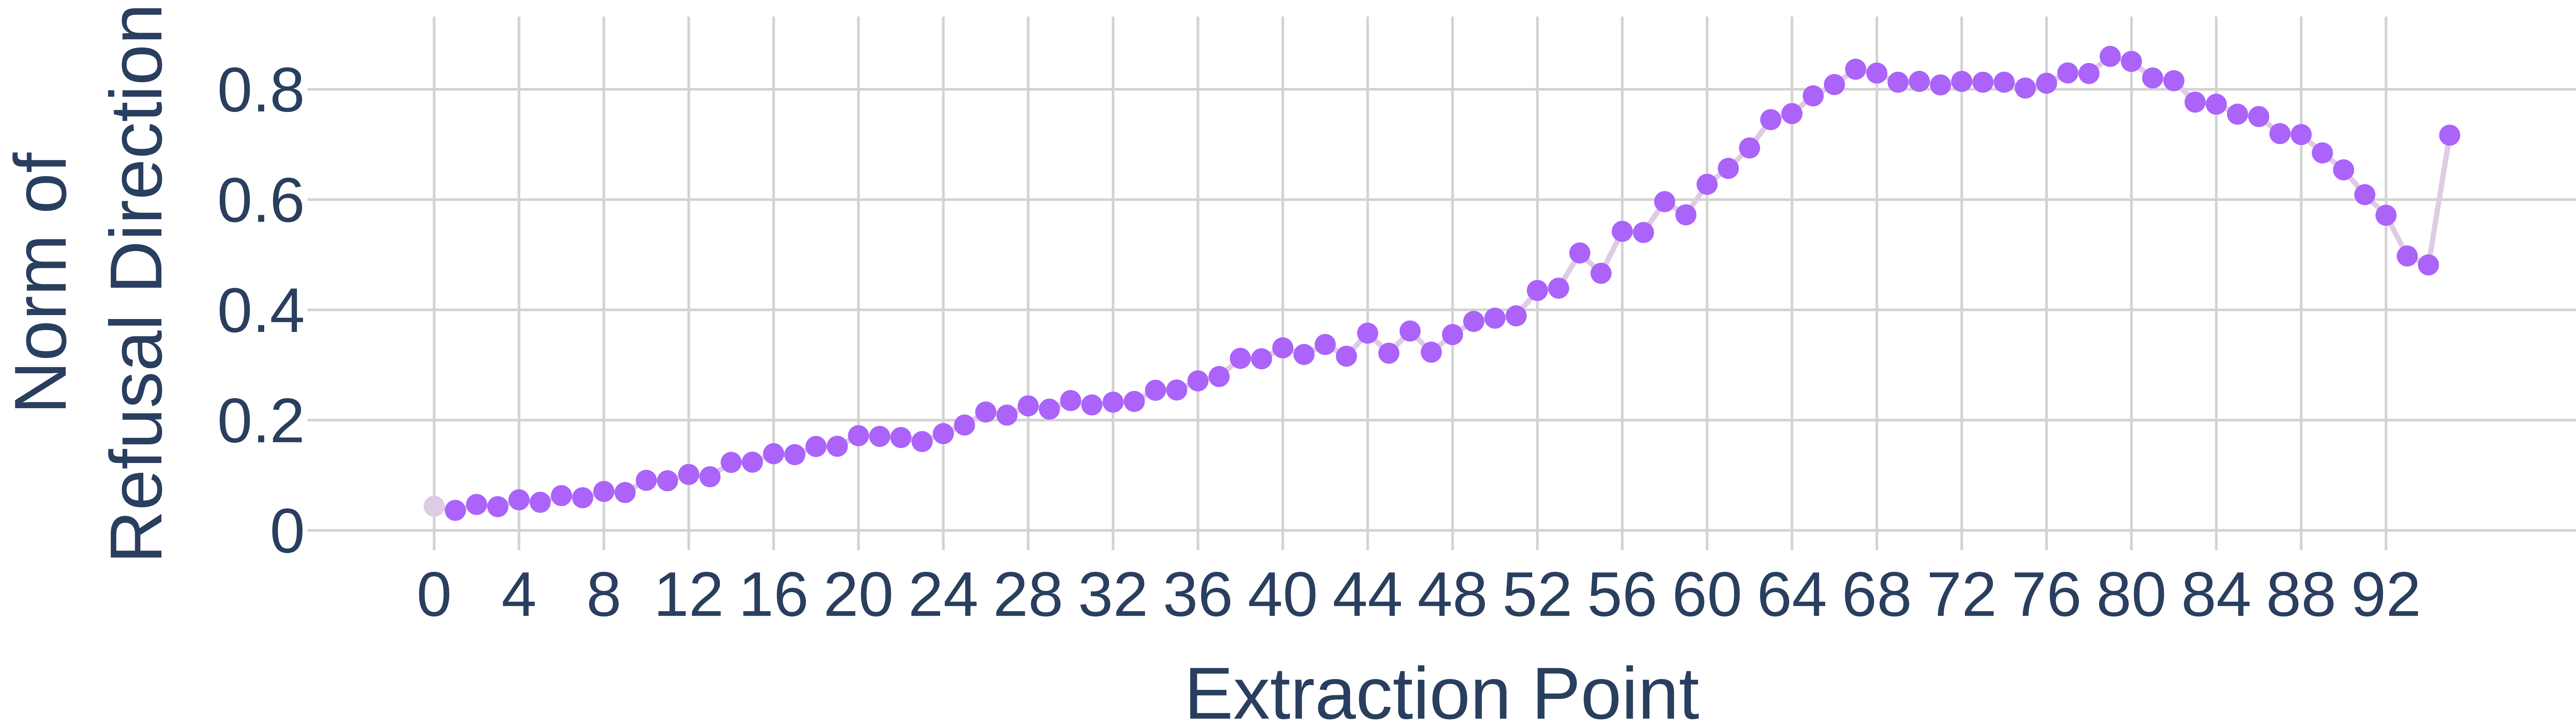

Supplement: supplementary_material [file norm_refusal.pdf › angular_steering/angular_steering/visualization/Qwen2.5-14B-Instruct/norm_refusal.pdf]

Scalar Projections

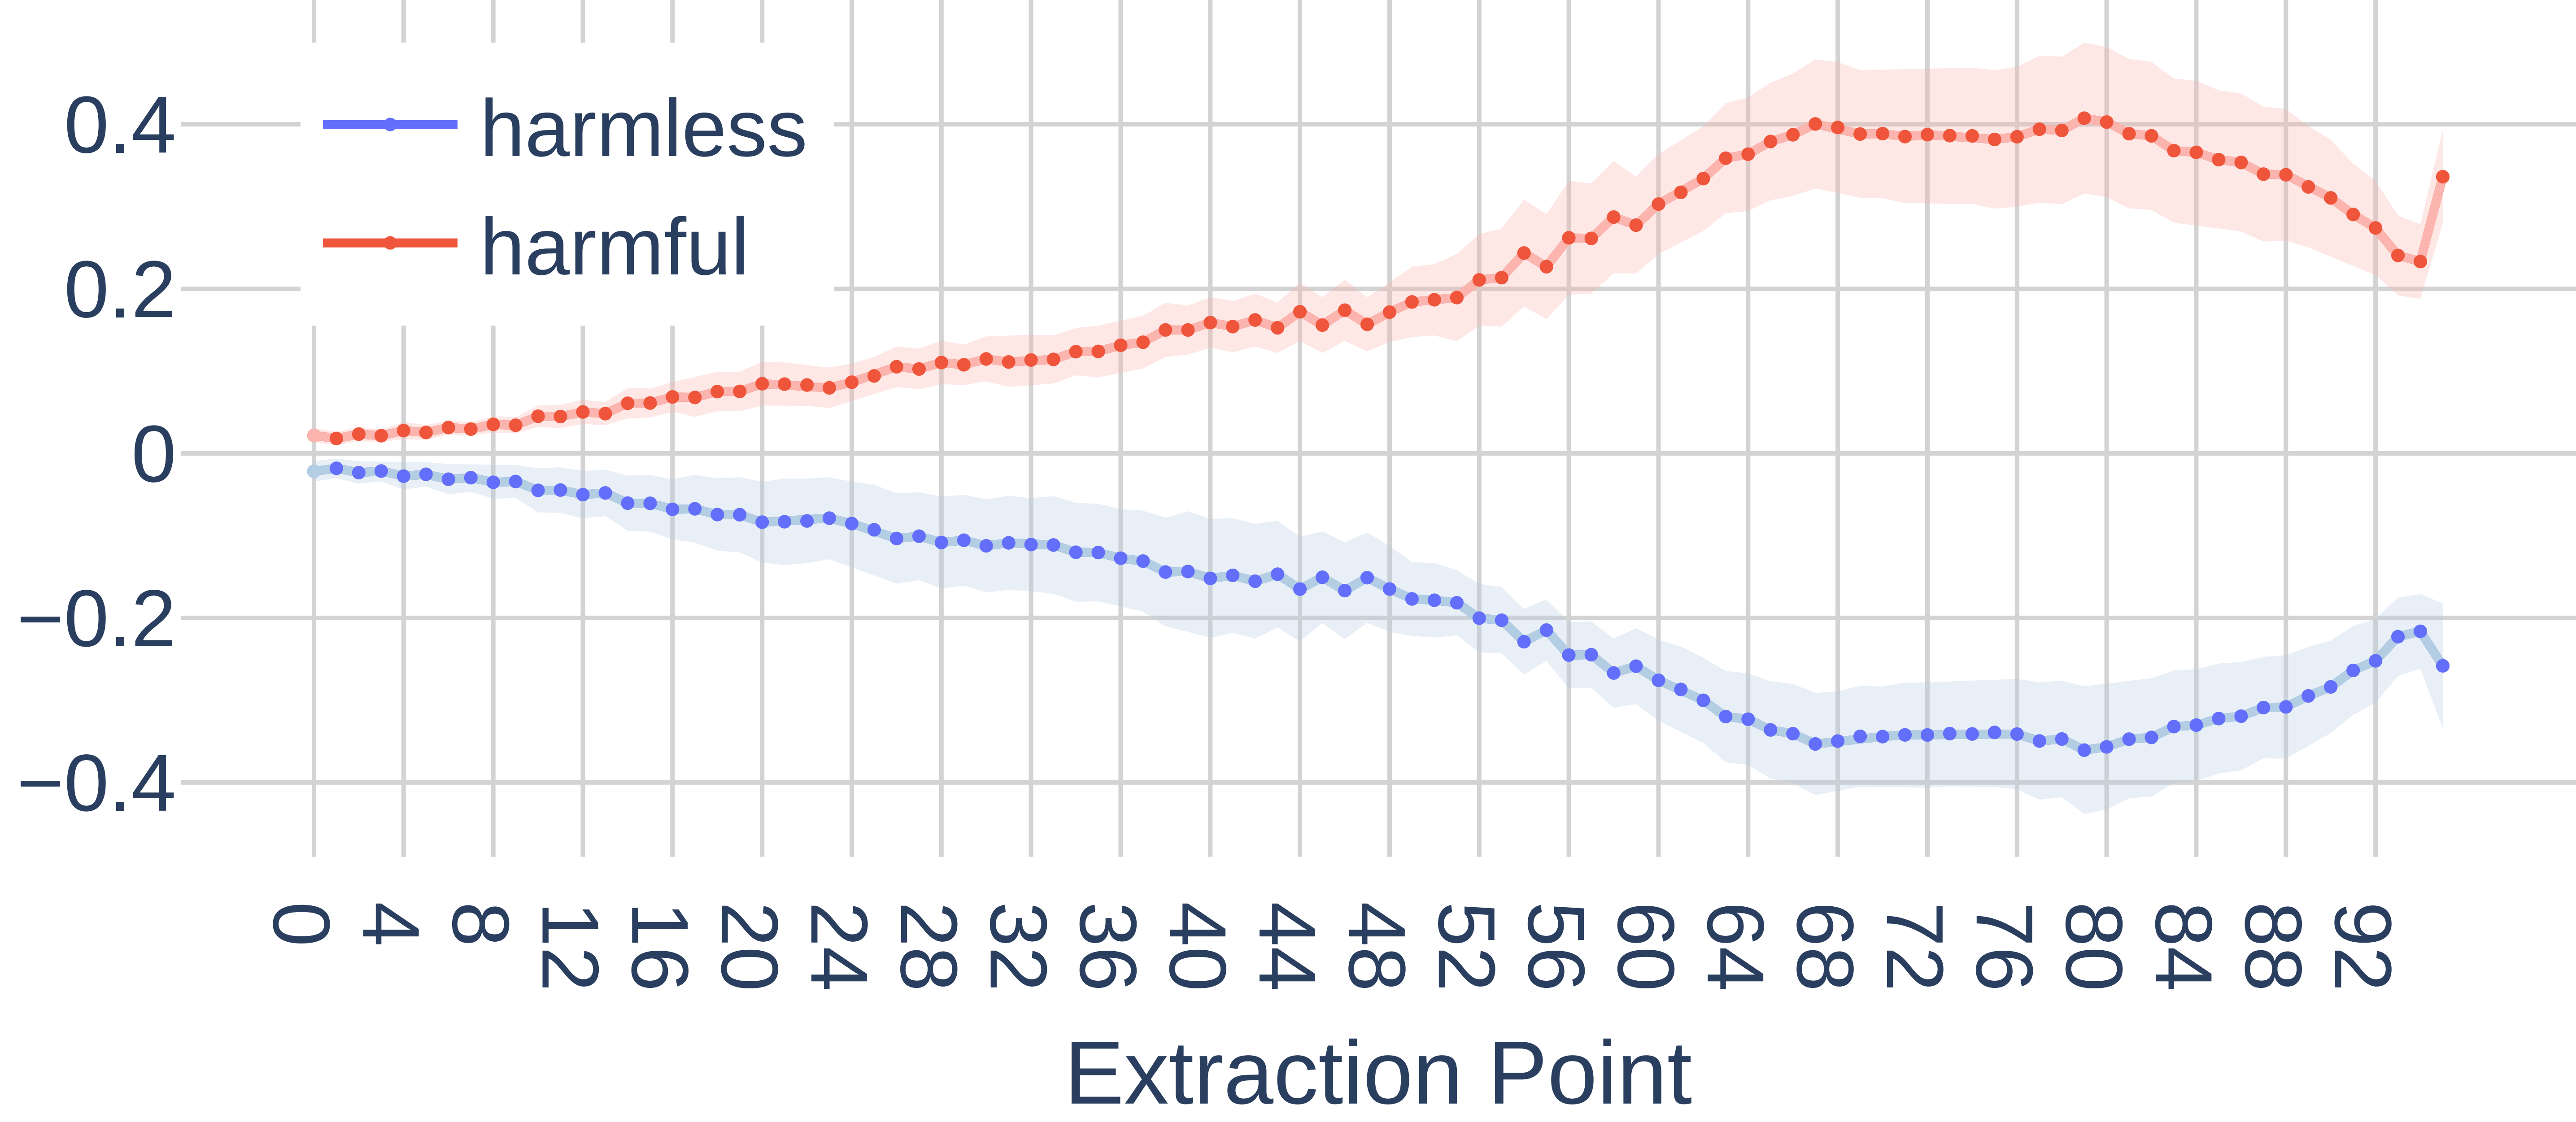

Supplement: supplementary_material [file prj_onto_local_refusal_candidates.pdf › angular_steering/angular_steering/visualization/Qwen2.5-14B-Instruct/prj_onto_local_refusal_candidates.pdf]

Scalar Projections

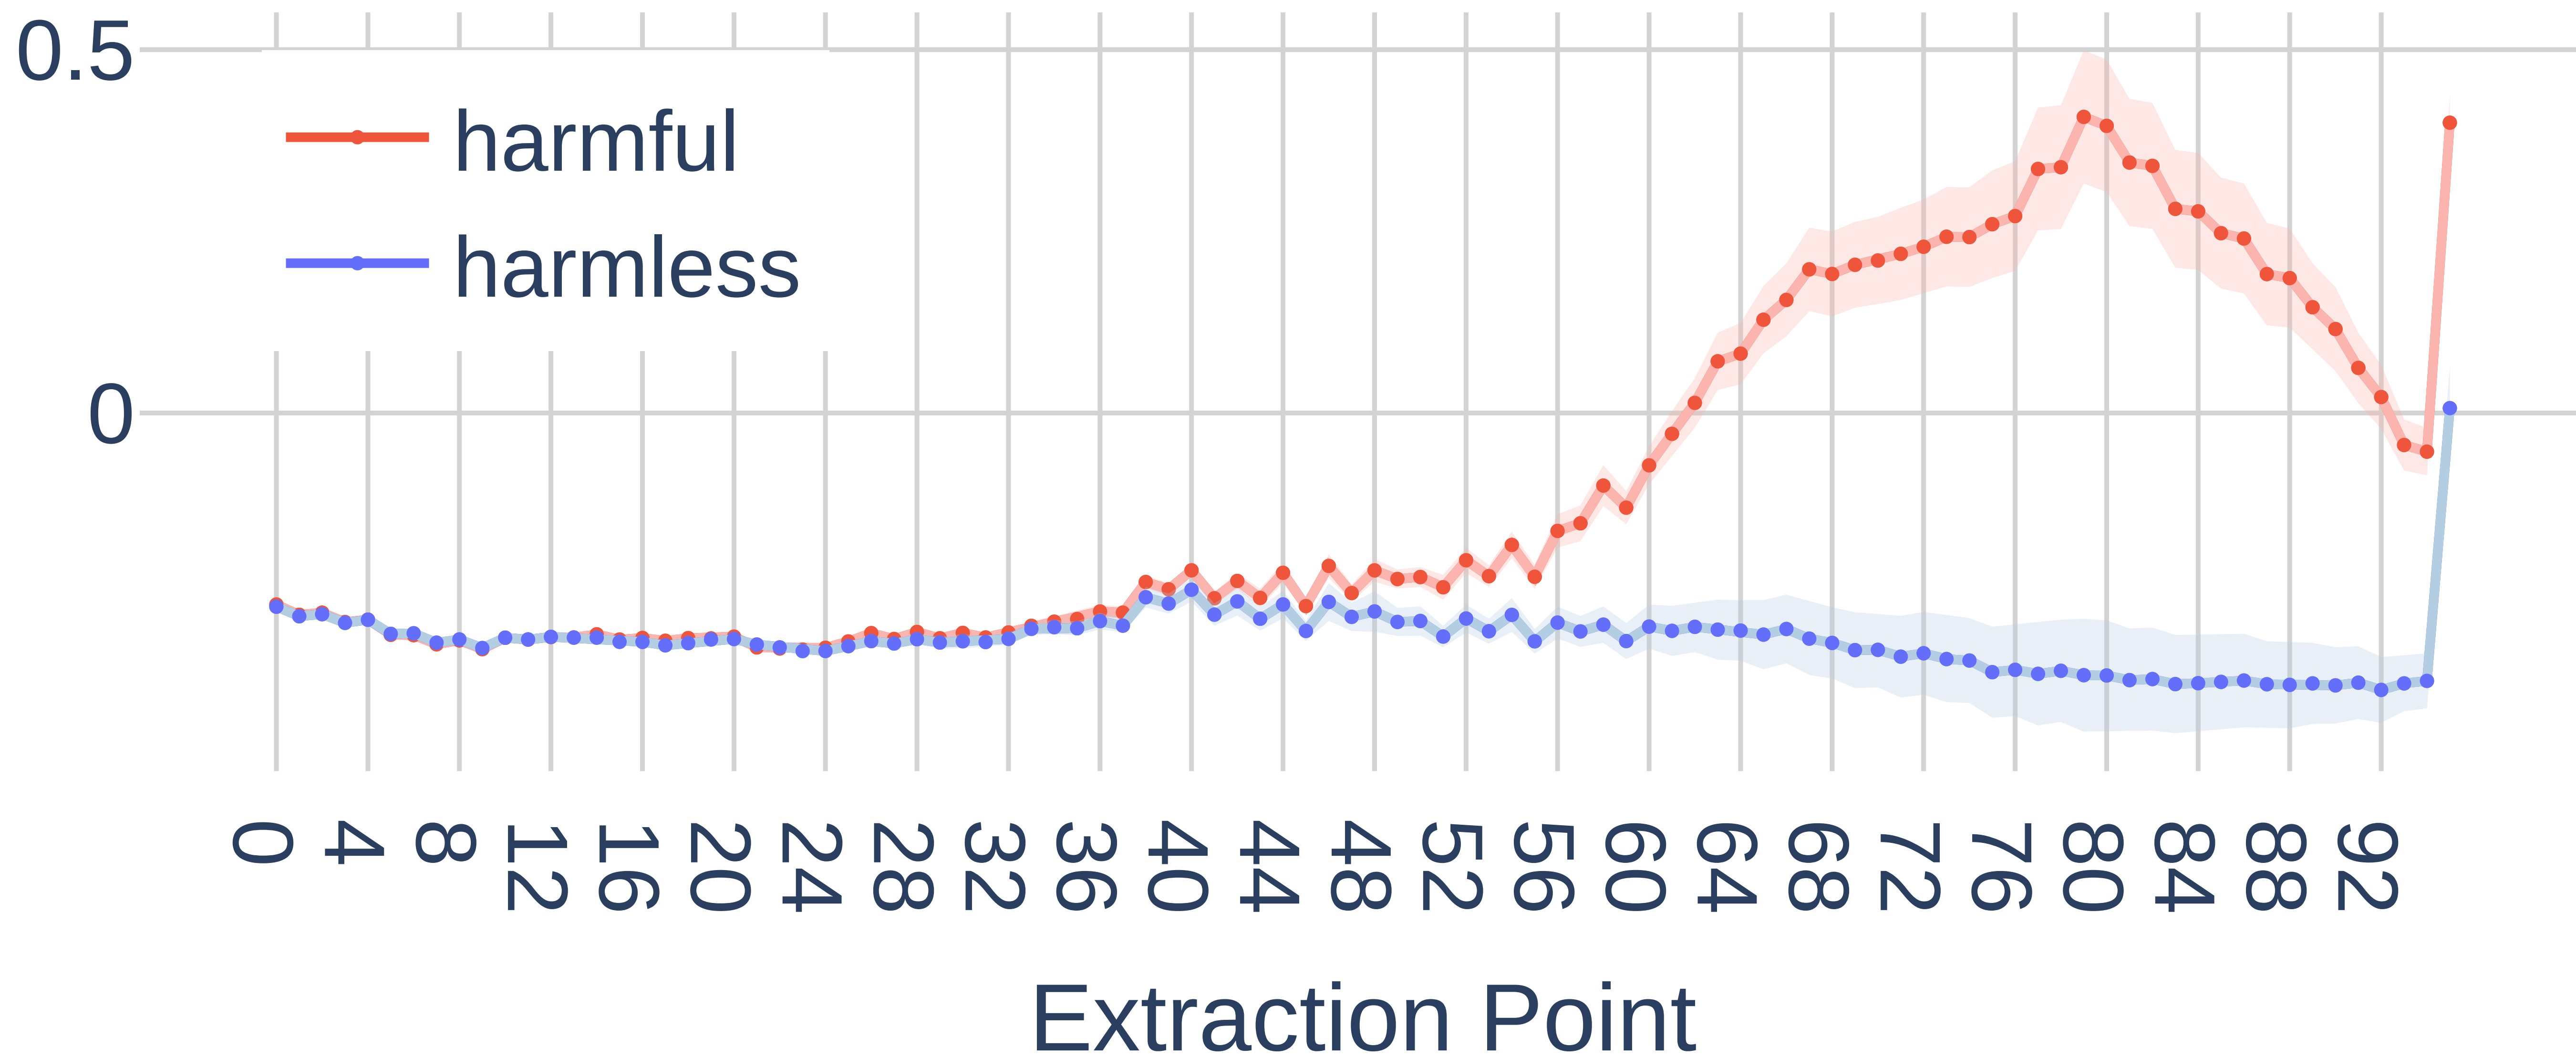

Supplement: supplementary_material [file prj_onto_refusal_dir.pdf › angular_steering/angular_steering/visualization/Qwen2.5-14B-Instruct/prj_onto_refusal_dir.pdf]

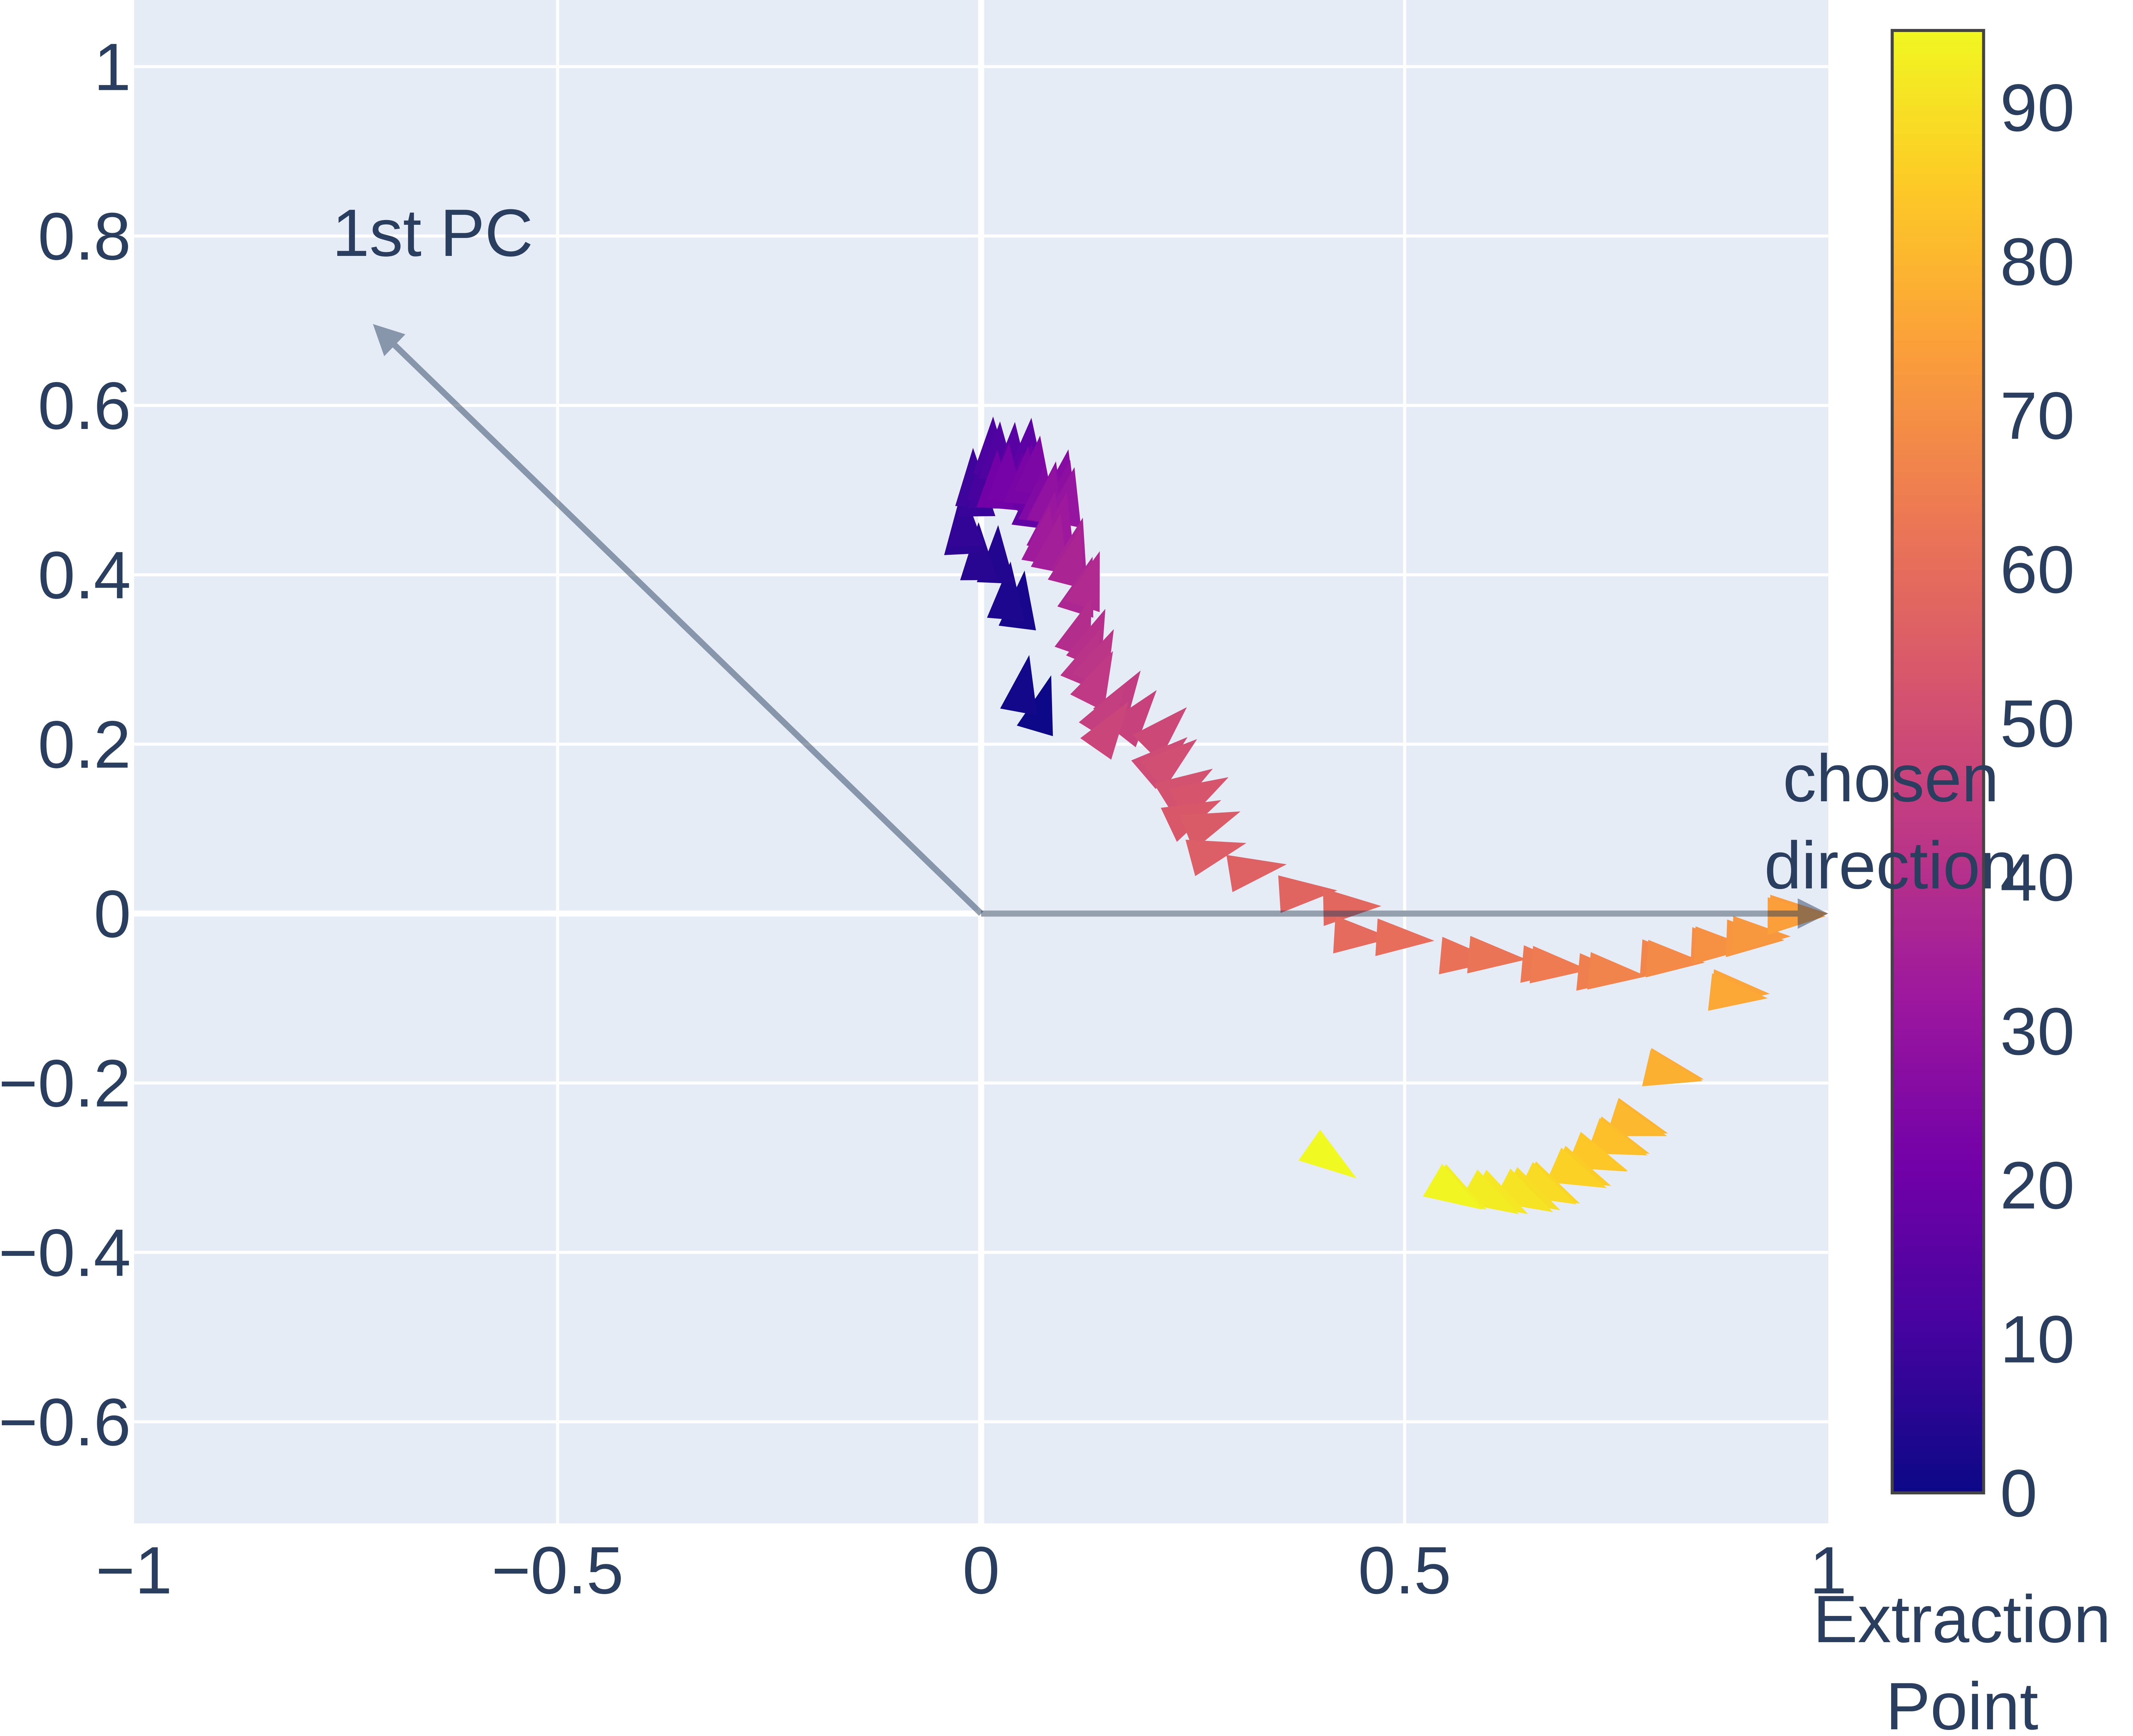

Supplement: supplementary_material [file steering_plane.pdf › angular_steering/angular_steering/visualization/Qwen2.5-14B-Instruct/steering_plane.pdf]

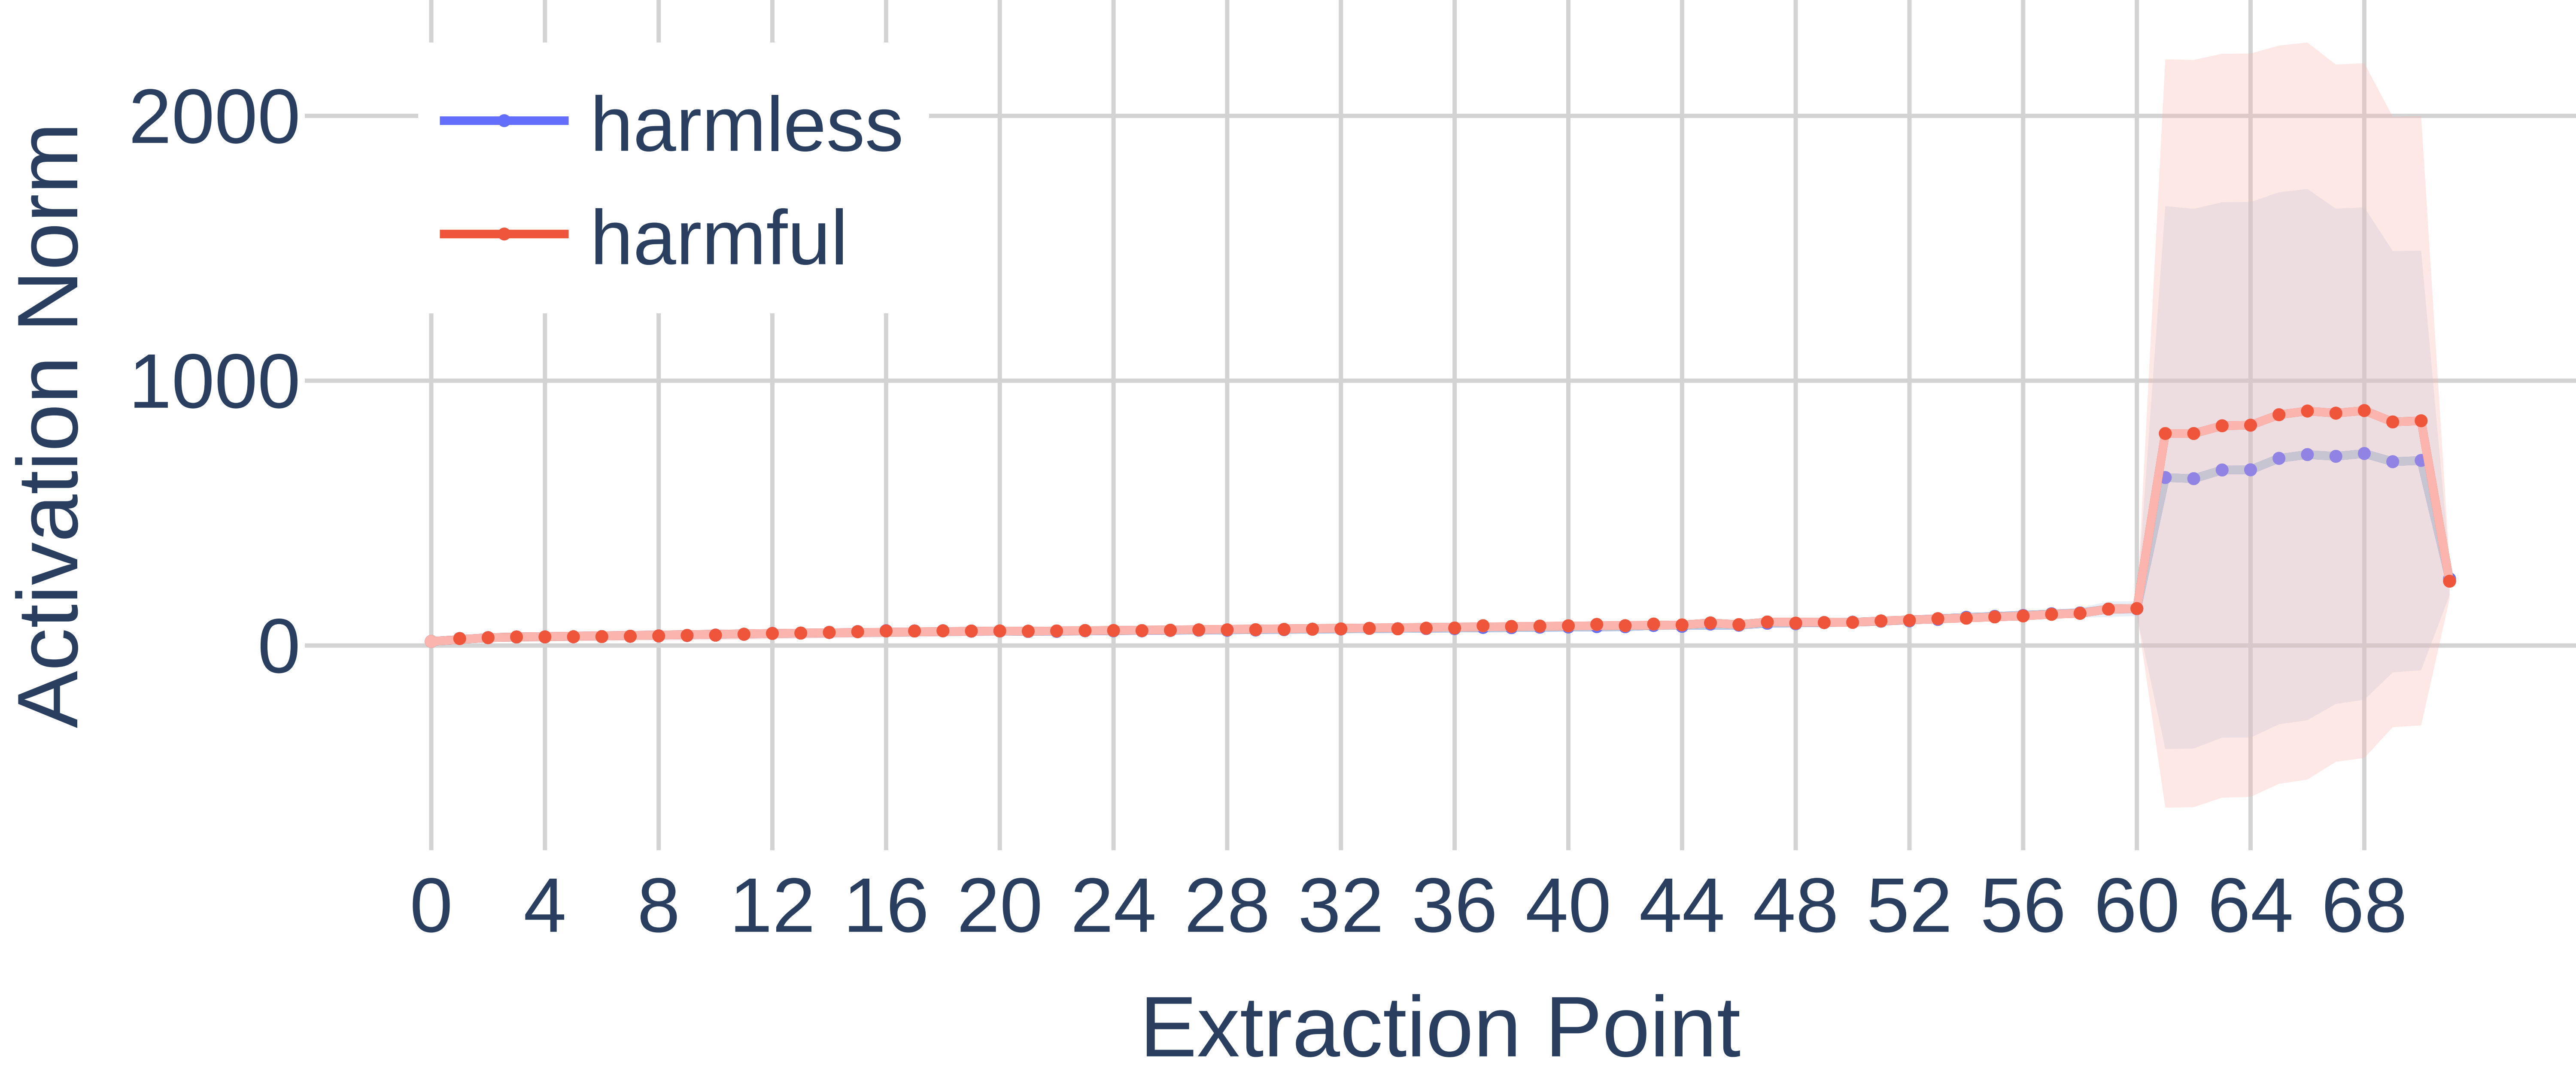

Supplement: supplementary_material [file acts_norm.pdf › angular_steering/angular_steering/visualization/Qwen2.5-3B-Instruct/acts_norm.pdf]

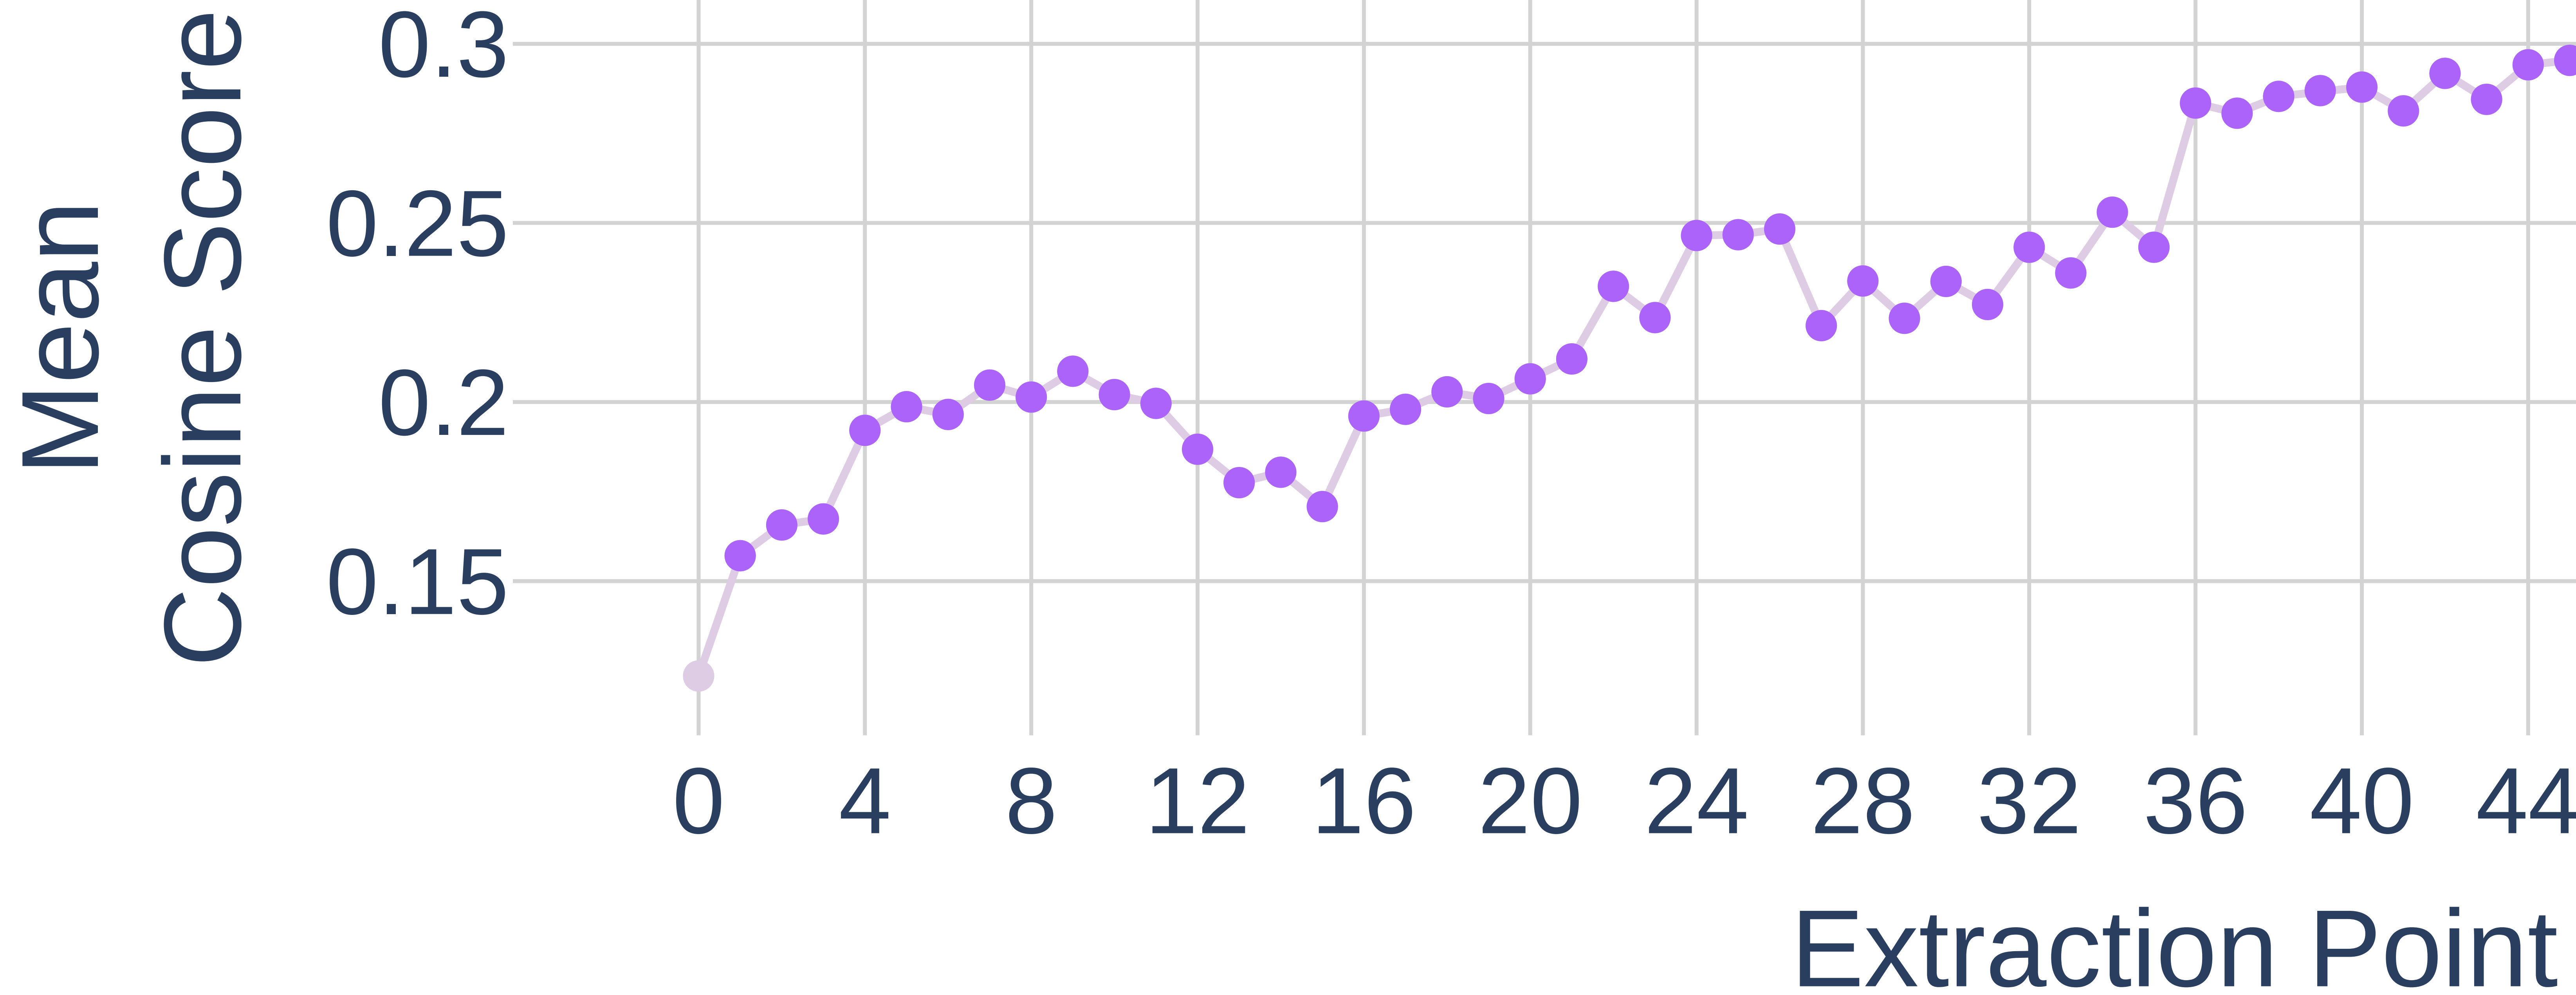

Supplement: supplementary_material [file mean_cosine.pdf › angular_steering/angular_steering/visualization/Qwen2.5-3B-Instruct/mean_cosine.pdf]

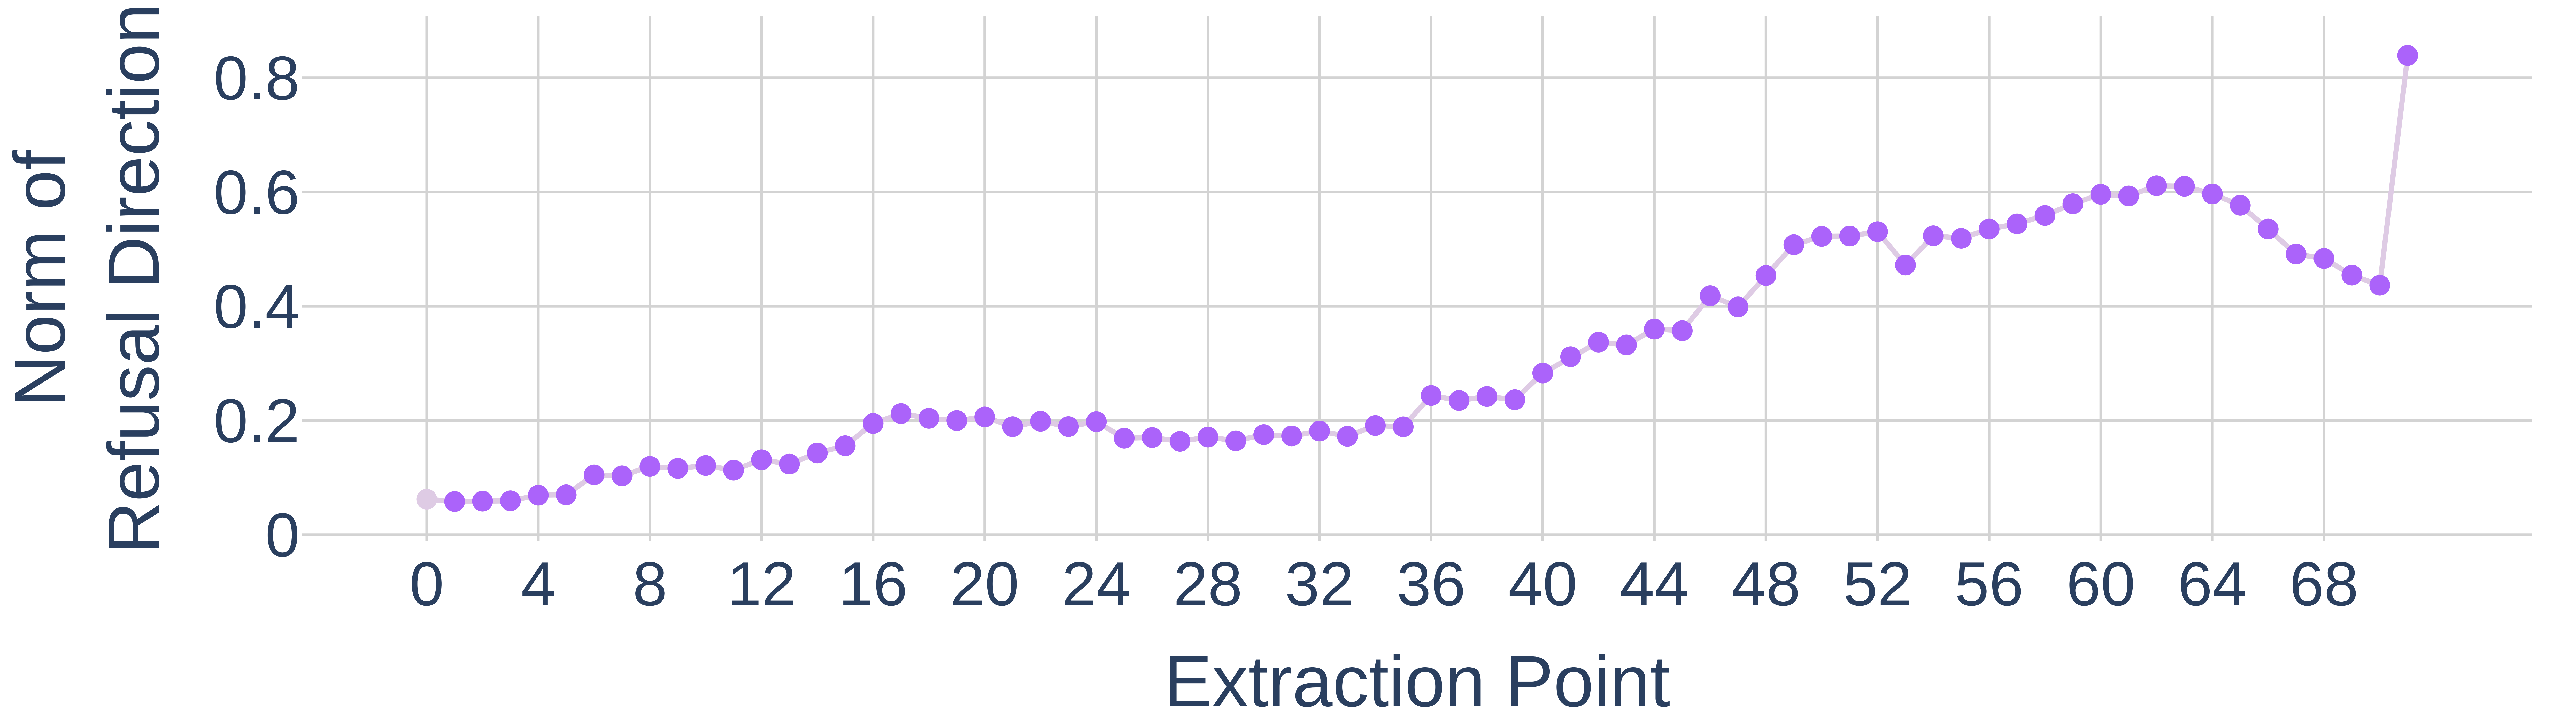

Supplement: supplementary_material [file norm_refusal.pdf › angular_steering/angular_steering/visualization/Qwen2.5-3B-Instruct/norm_refusal.pdf]

Scalar Projections

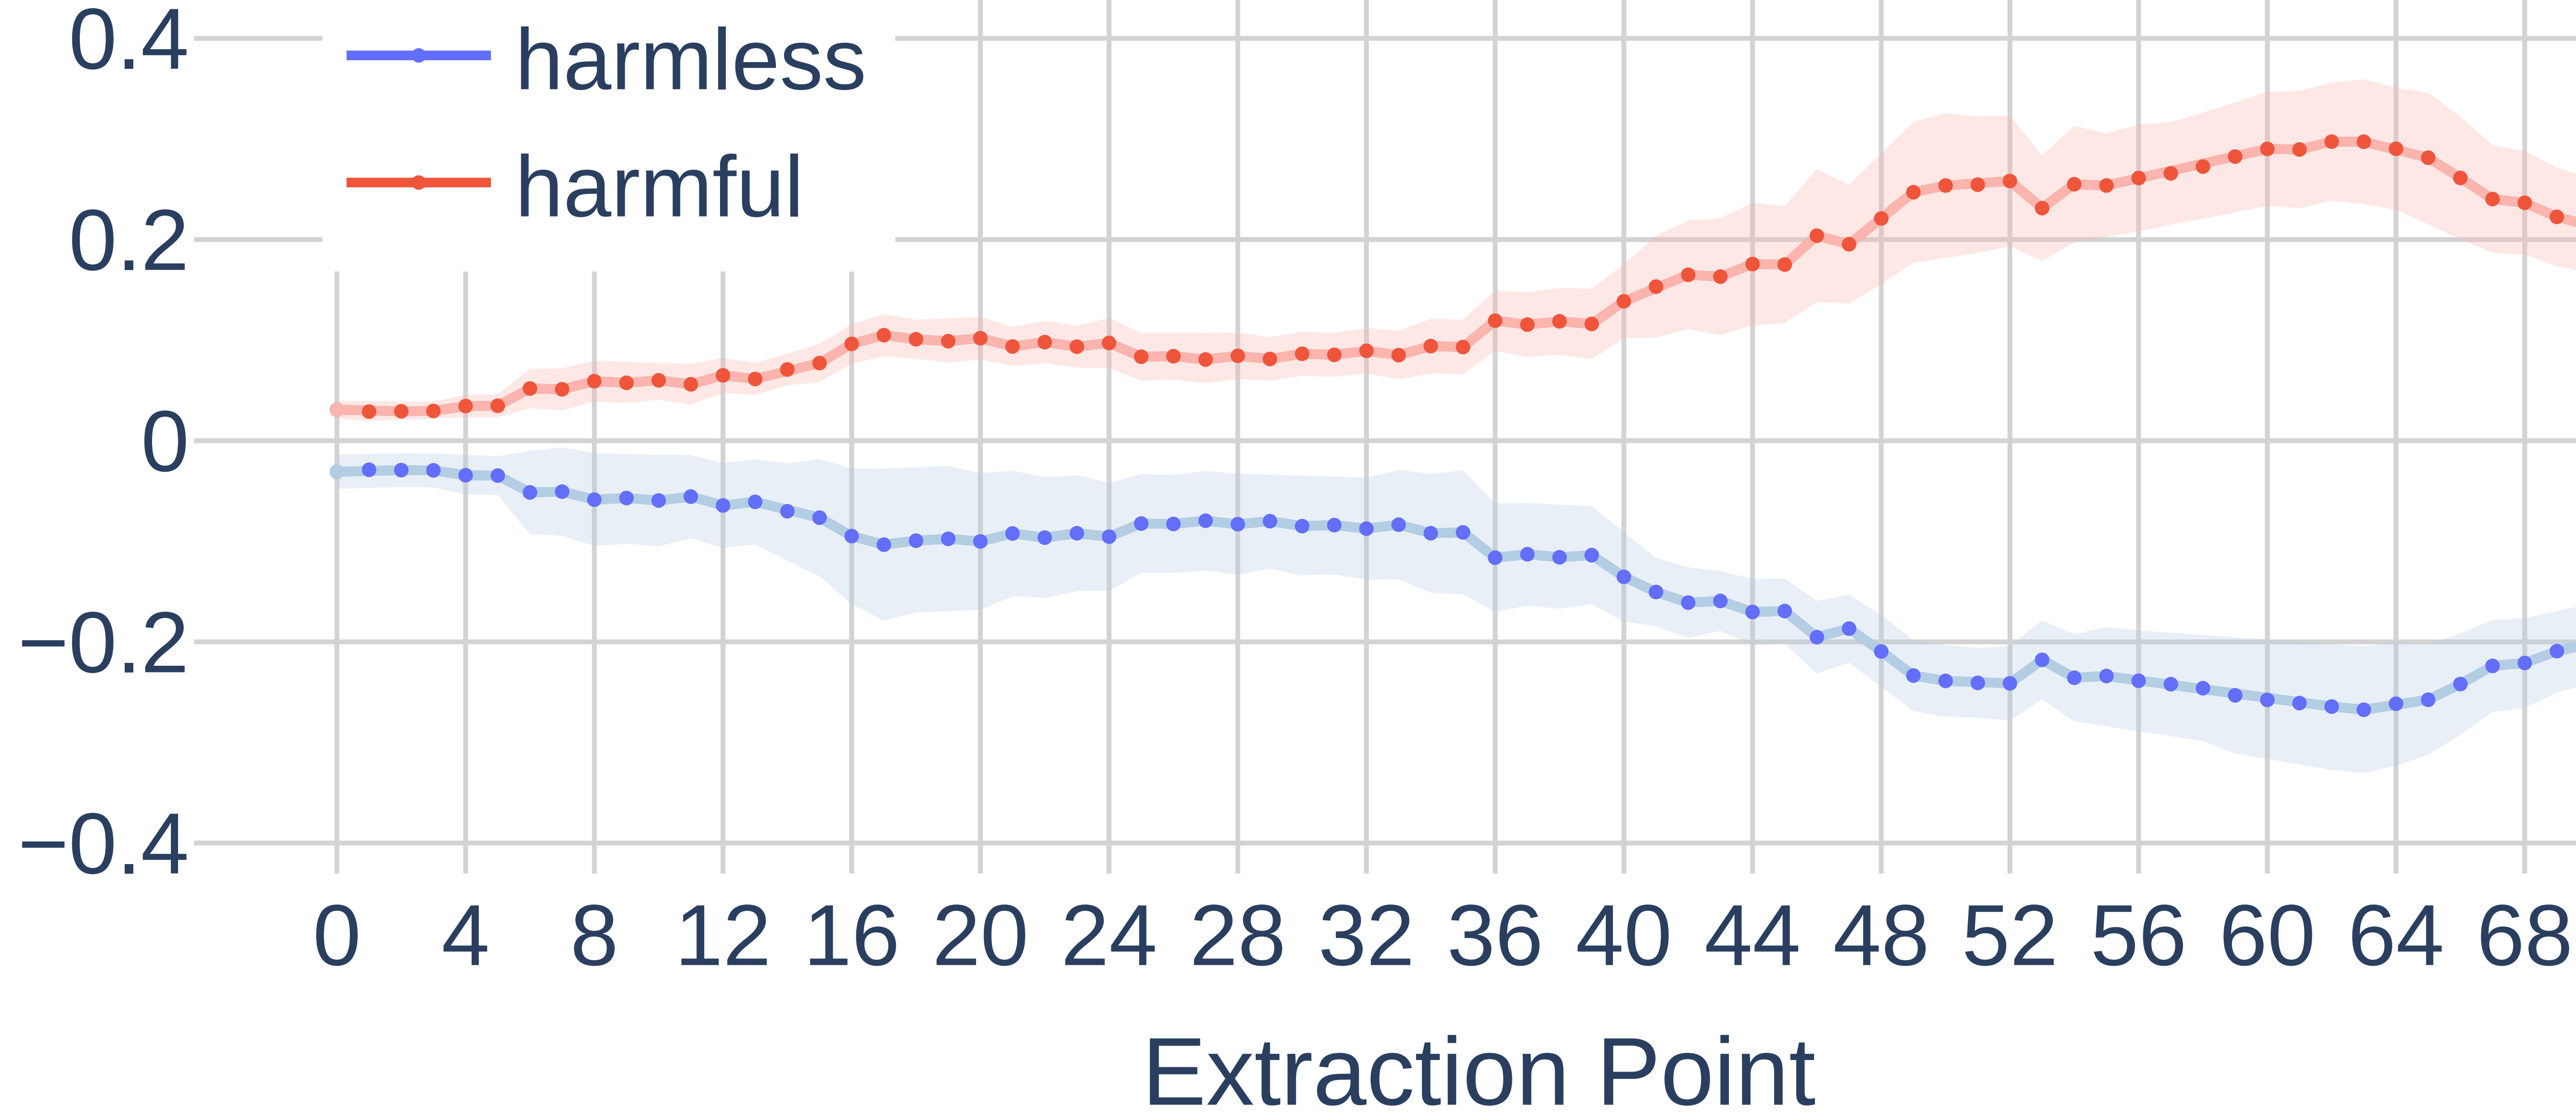

Supplement: supplementary_material [file prj_onto_local_refusal_candidates.pdf › angular_steering/angular_steering/visualization/Qwen2.5-3B-Instruct/prj_onto_local_refusal_candidates.pdf]

Scalar Projections

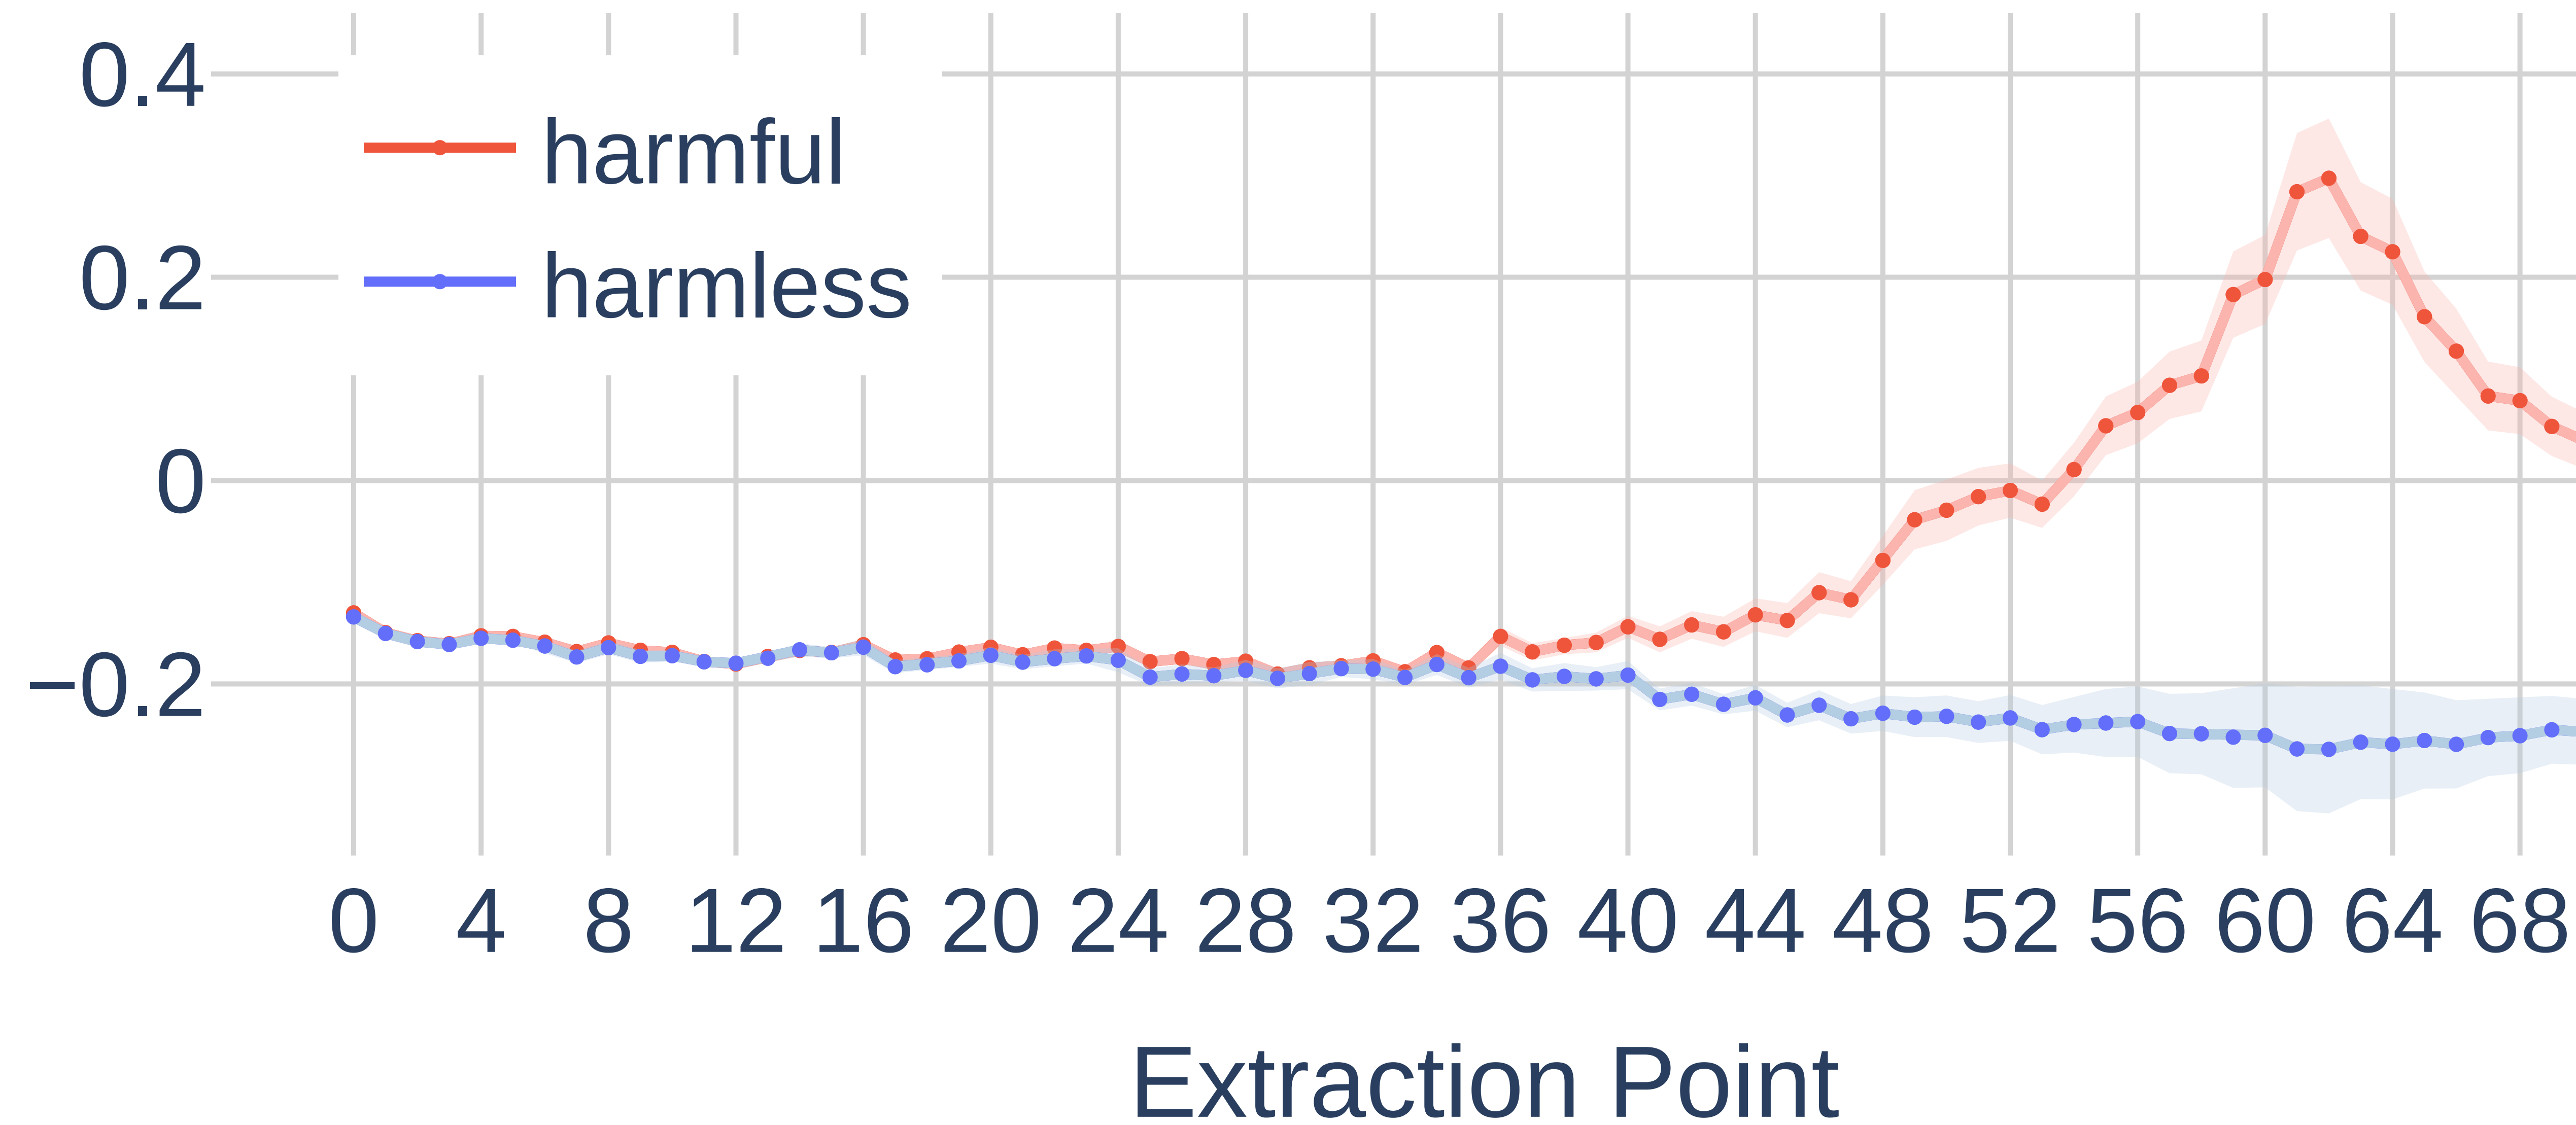

Supplement: supplementary_material [file prj_onto_refusal_dir.pdf › angular_steering/angular_steering/visualization/Qwen2.5-3B-Instruct/prj_onto_refusal_dir.pdf]

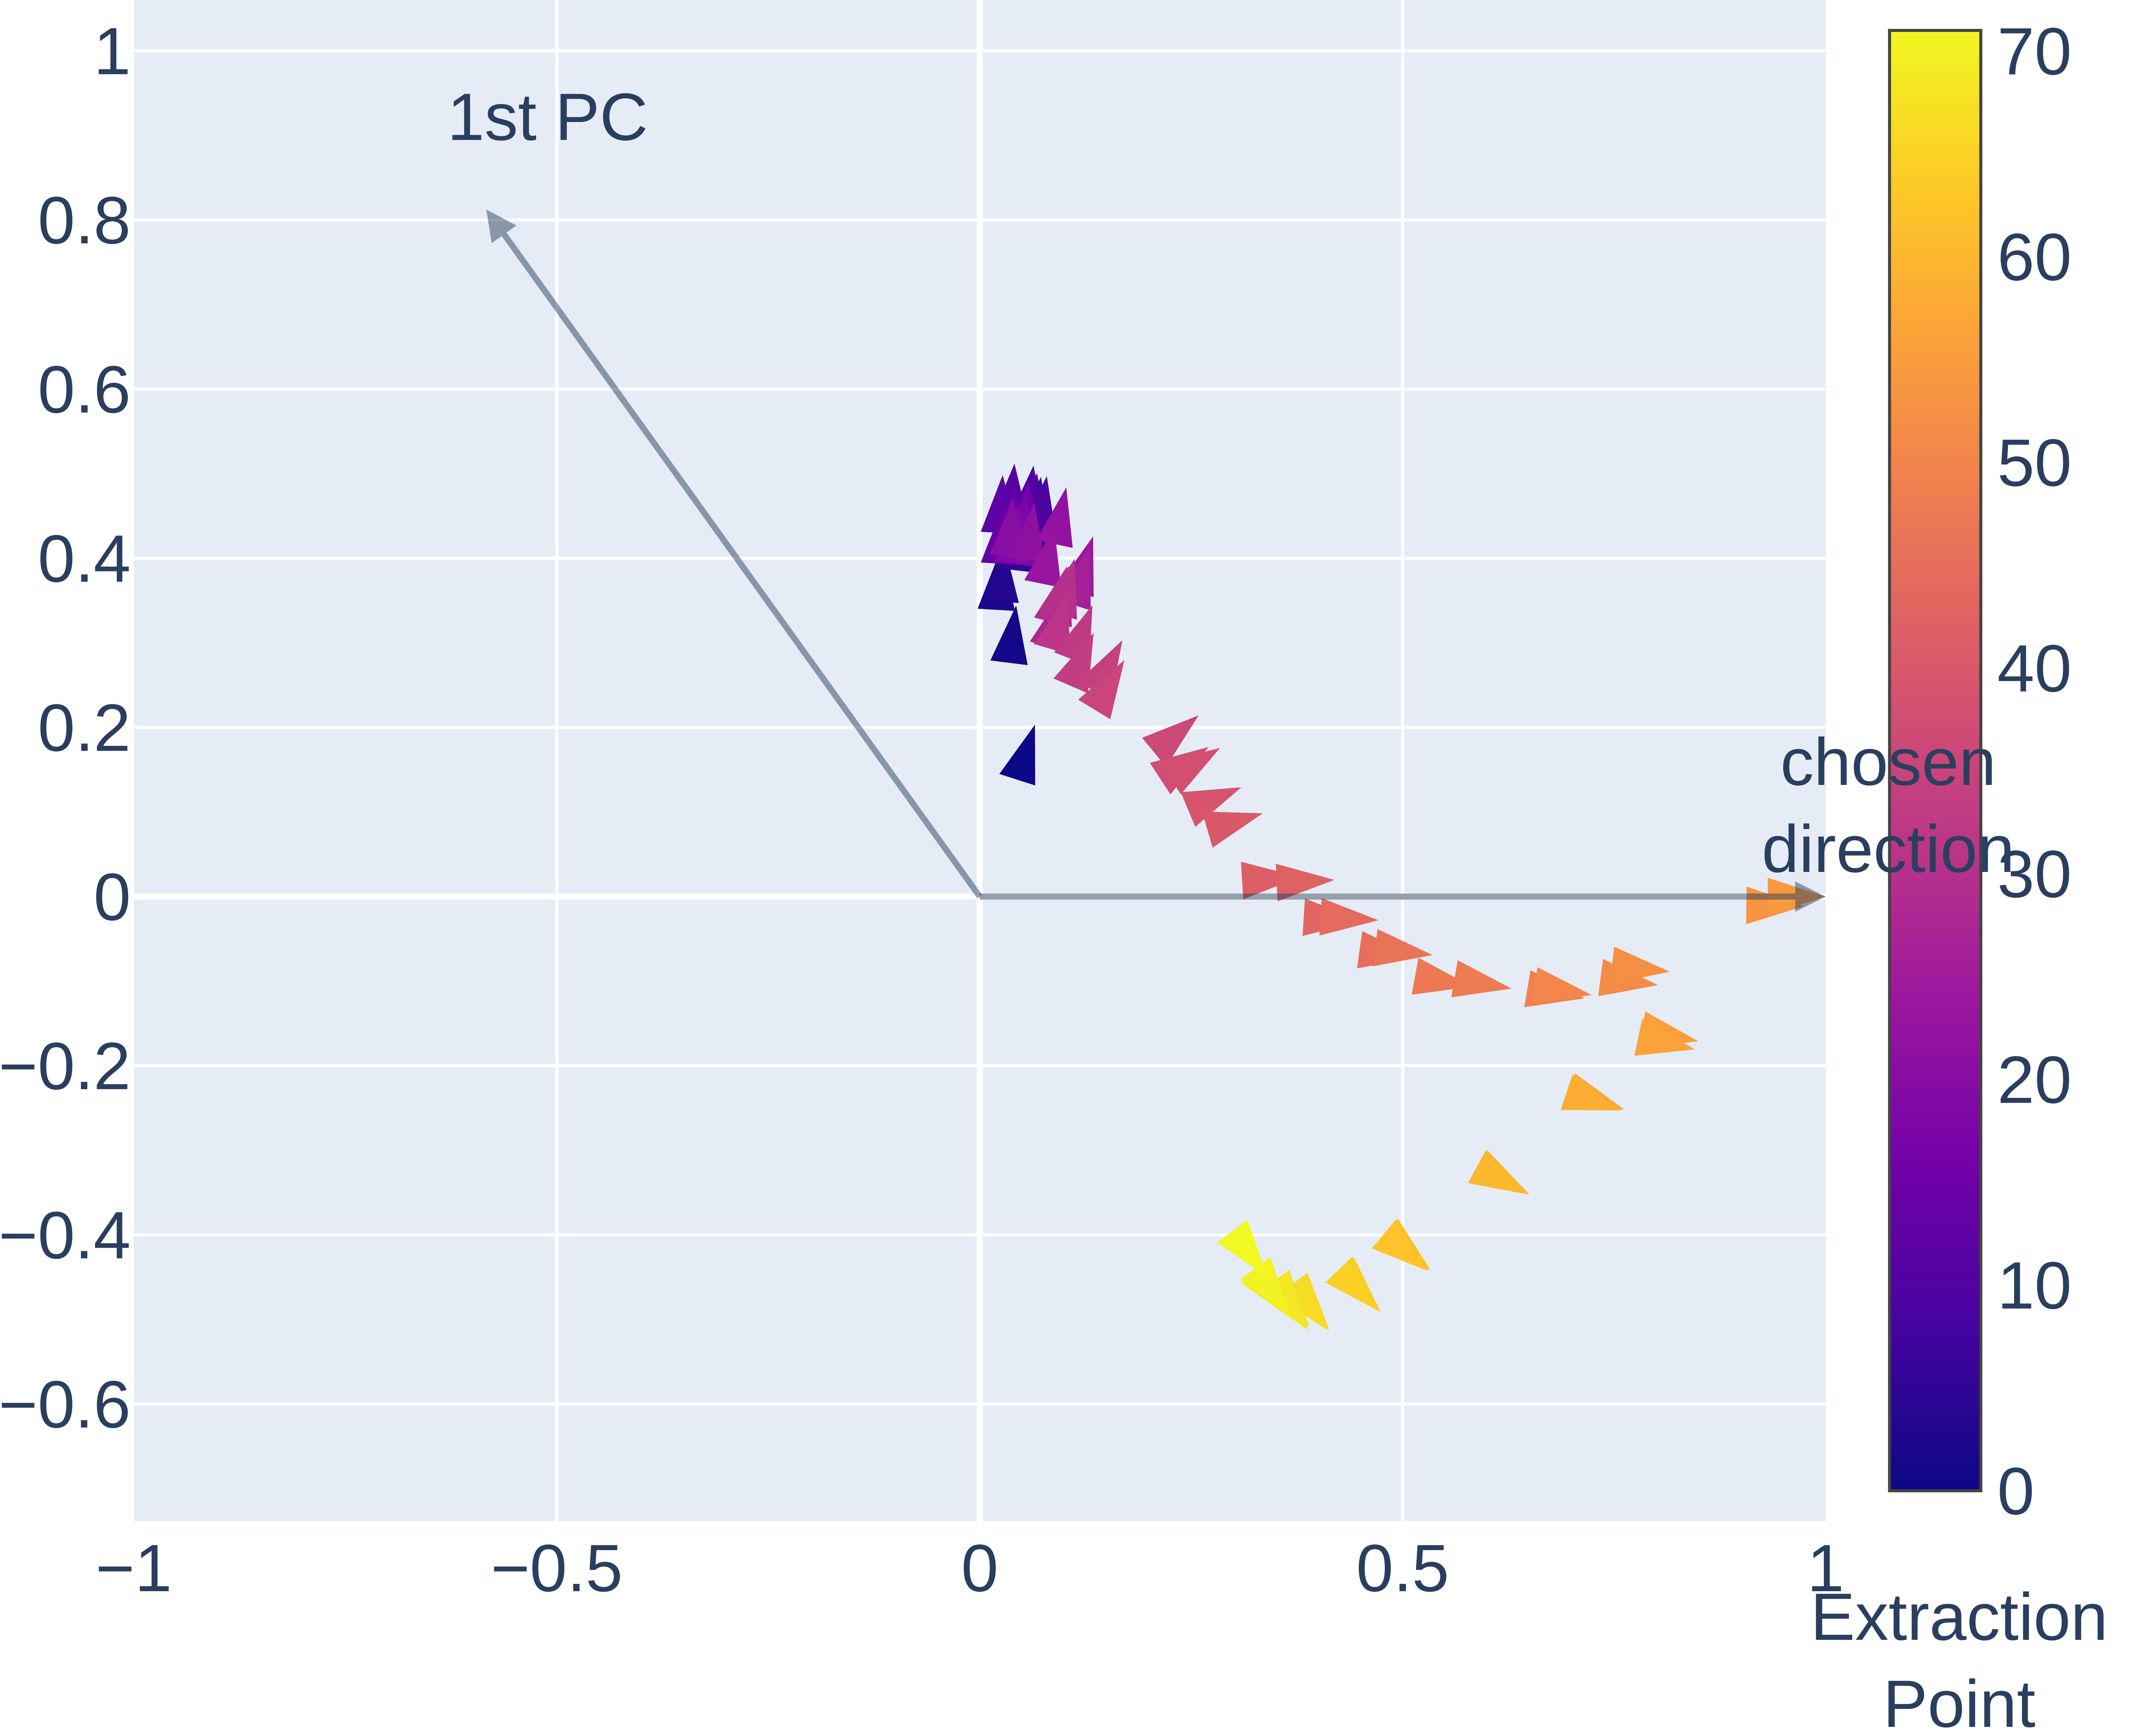

Supplement: supplementary_material [file steering_plane.pdf › angular_steering/angular_steering/visualization/Qwen2.5-3B-Instruct/steering_plane.pdf]

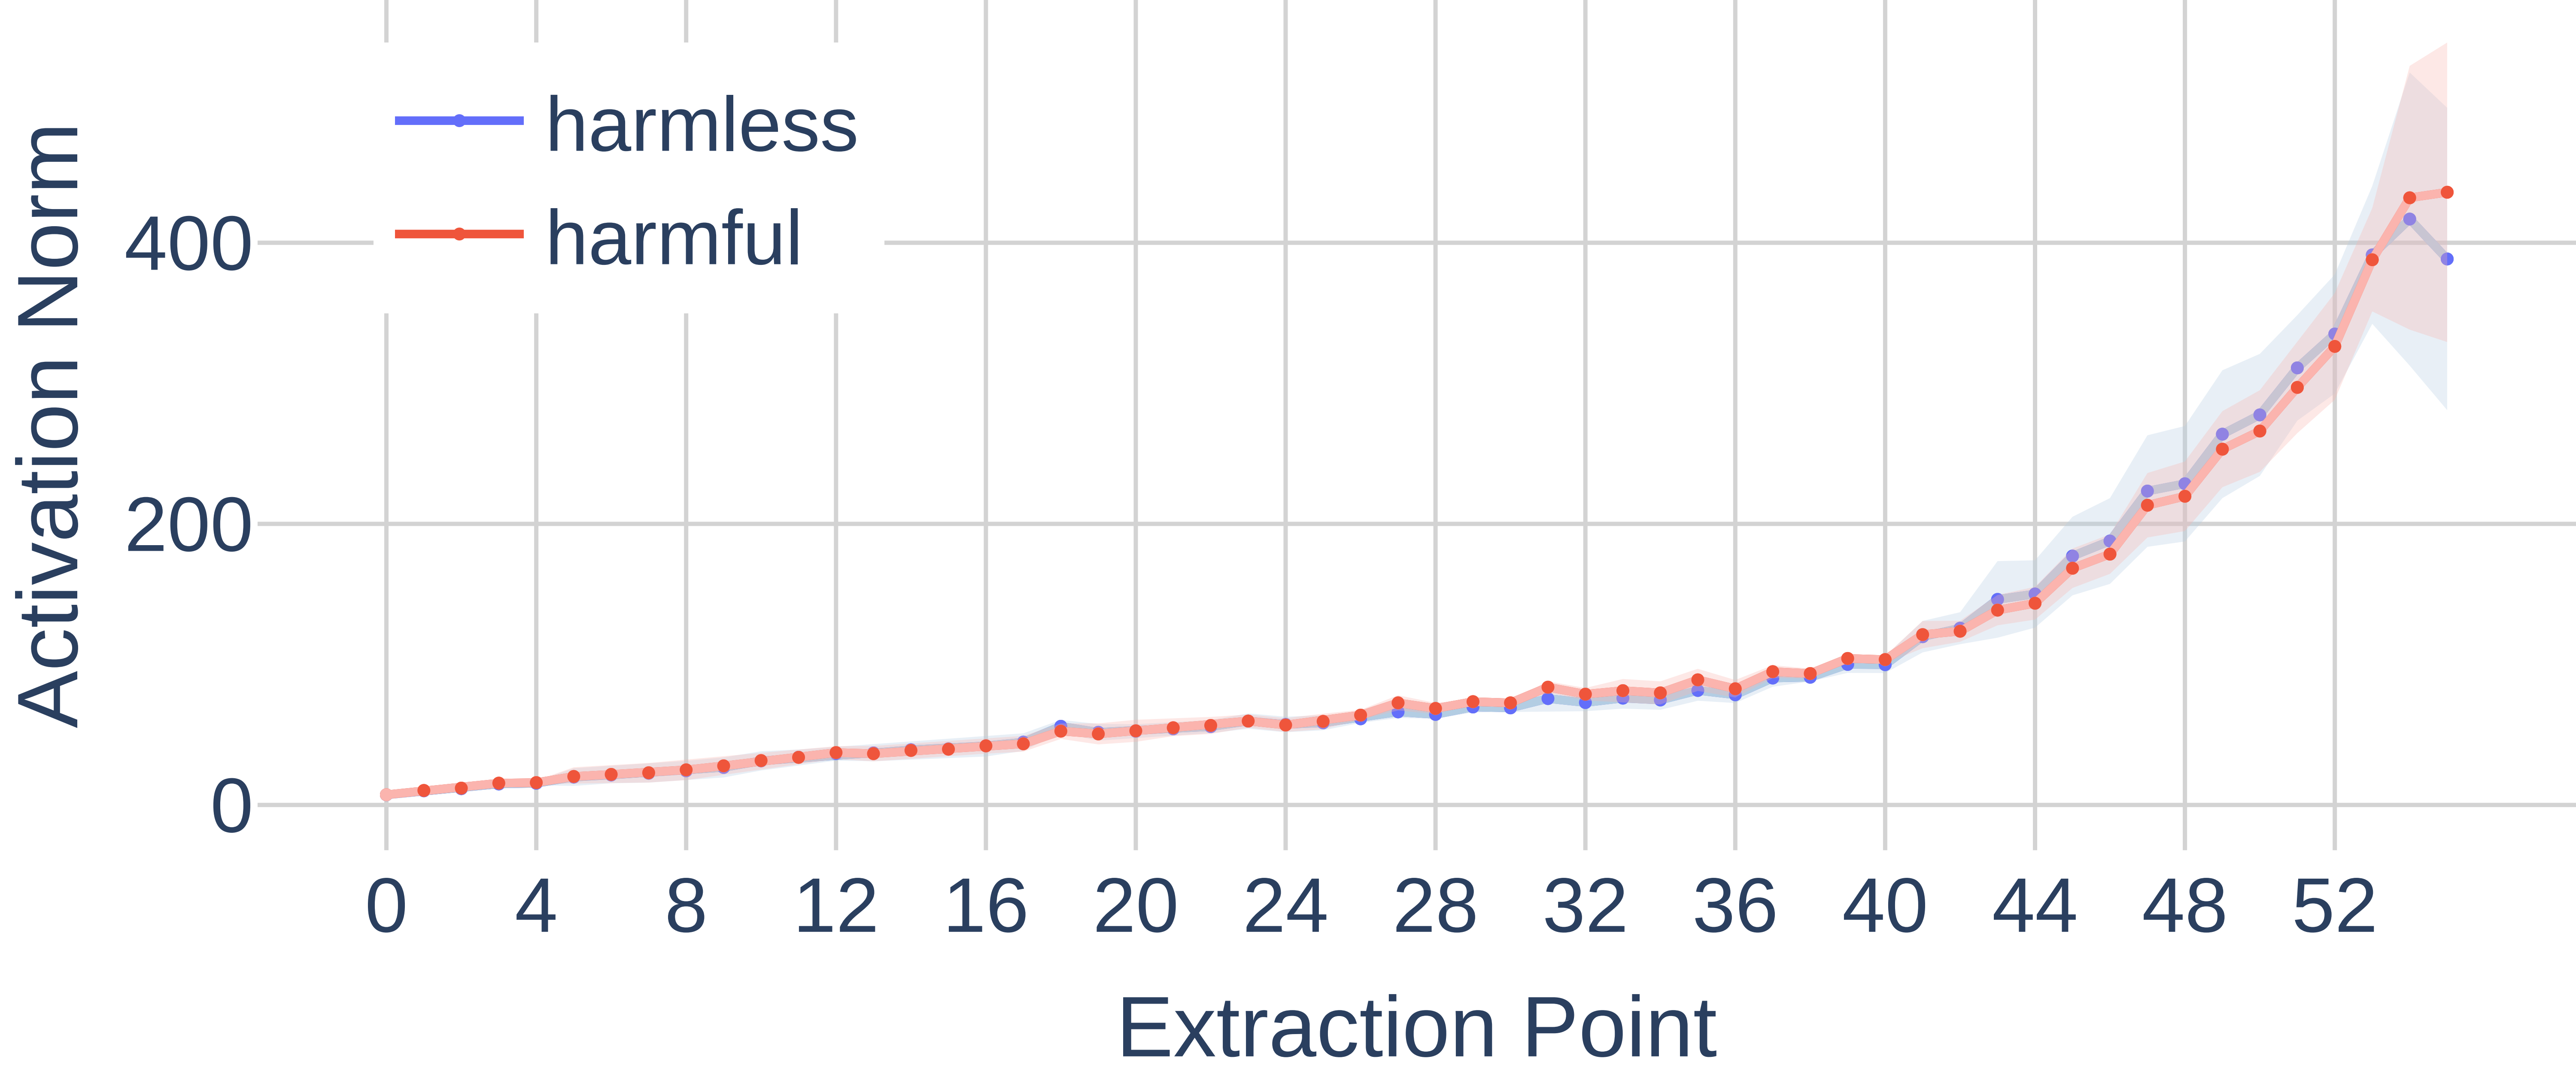

Supplement: supplementary_material [file acts_norm.pdf › angular_steering/angular_steering/visualization/Qwen2.5-7B-Instruct/acts_norm.pdf]

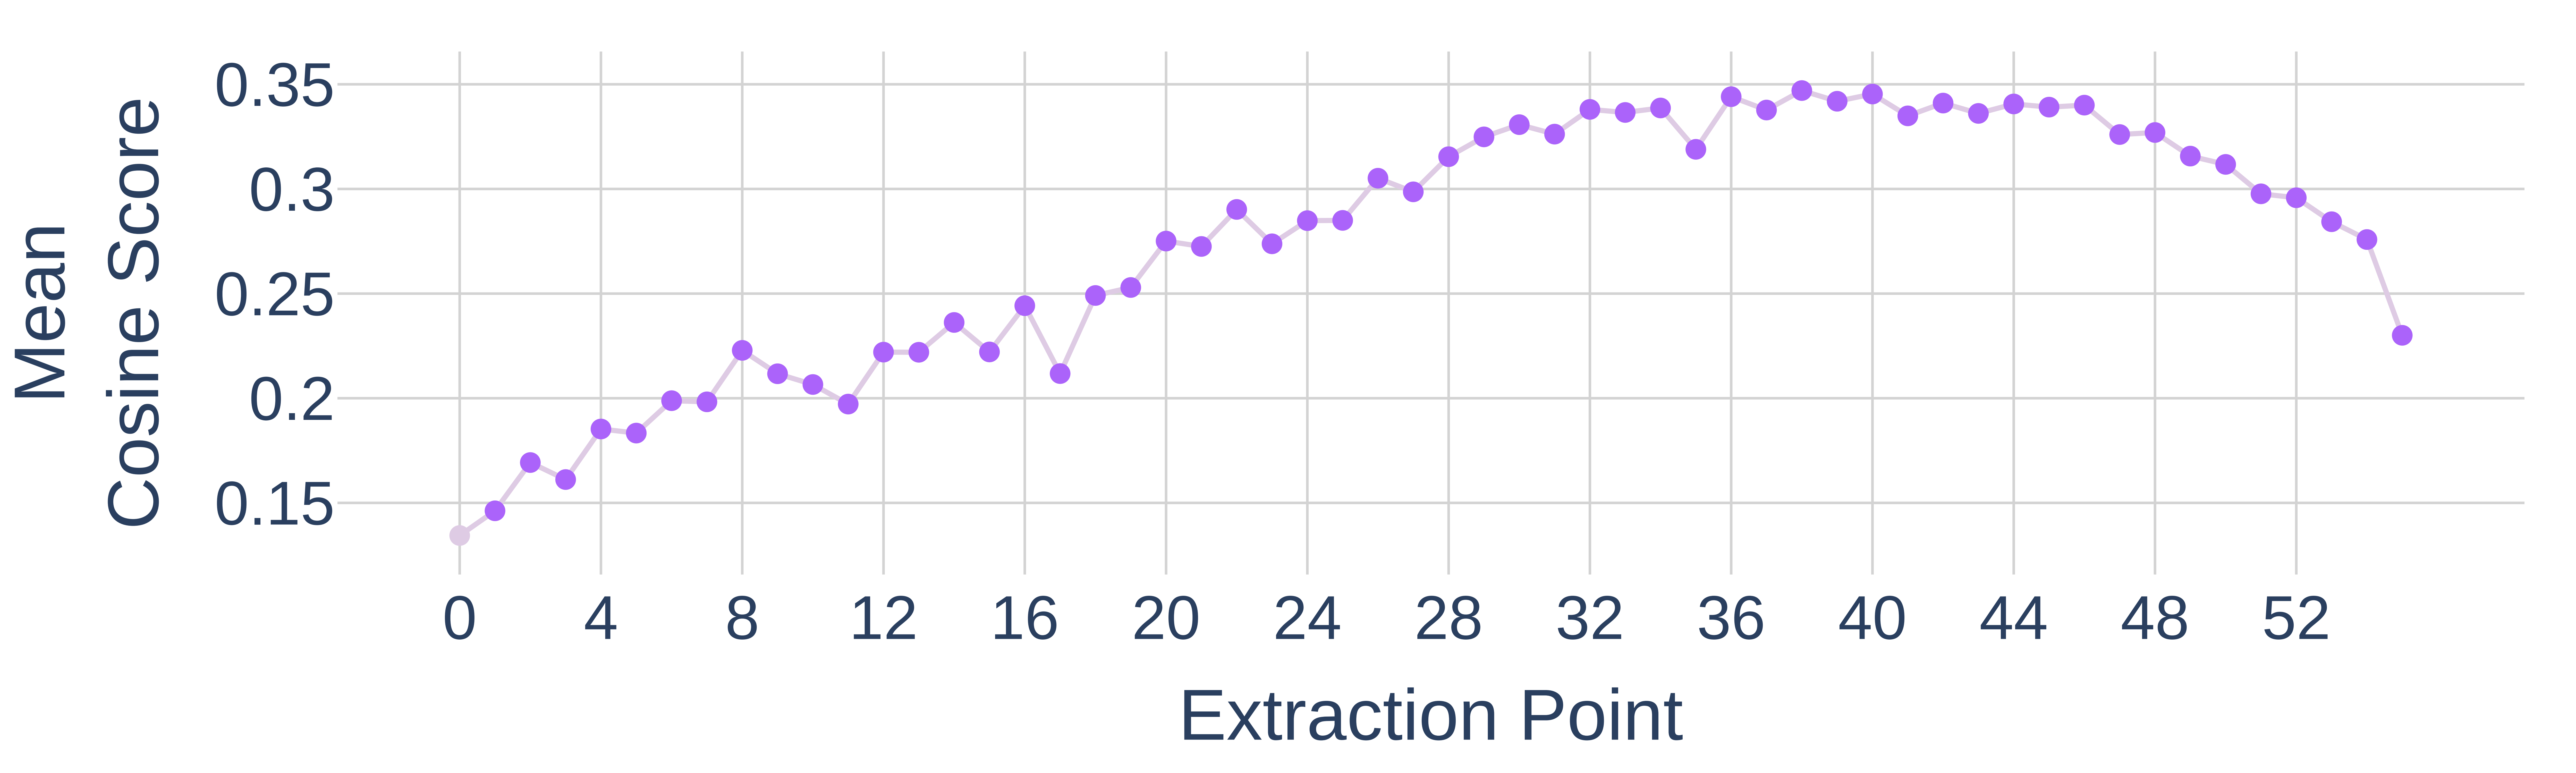

Supplement: supplementary_material [file mean_cosine.pdf › angular_steering/angular_steering/visualization/Qwen2.5-7B-Instruct/mean_cosine.pdf]

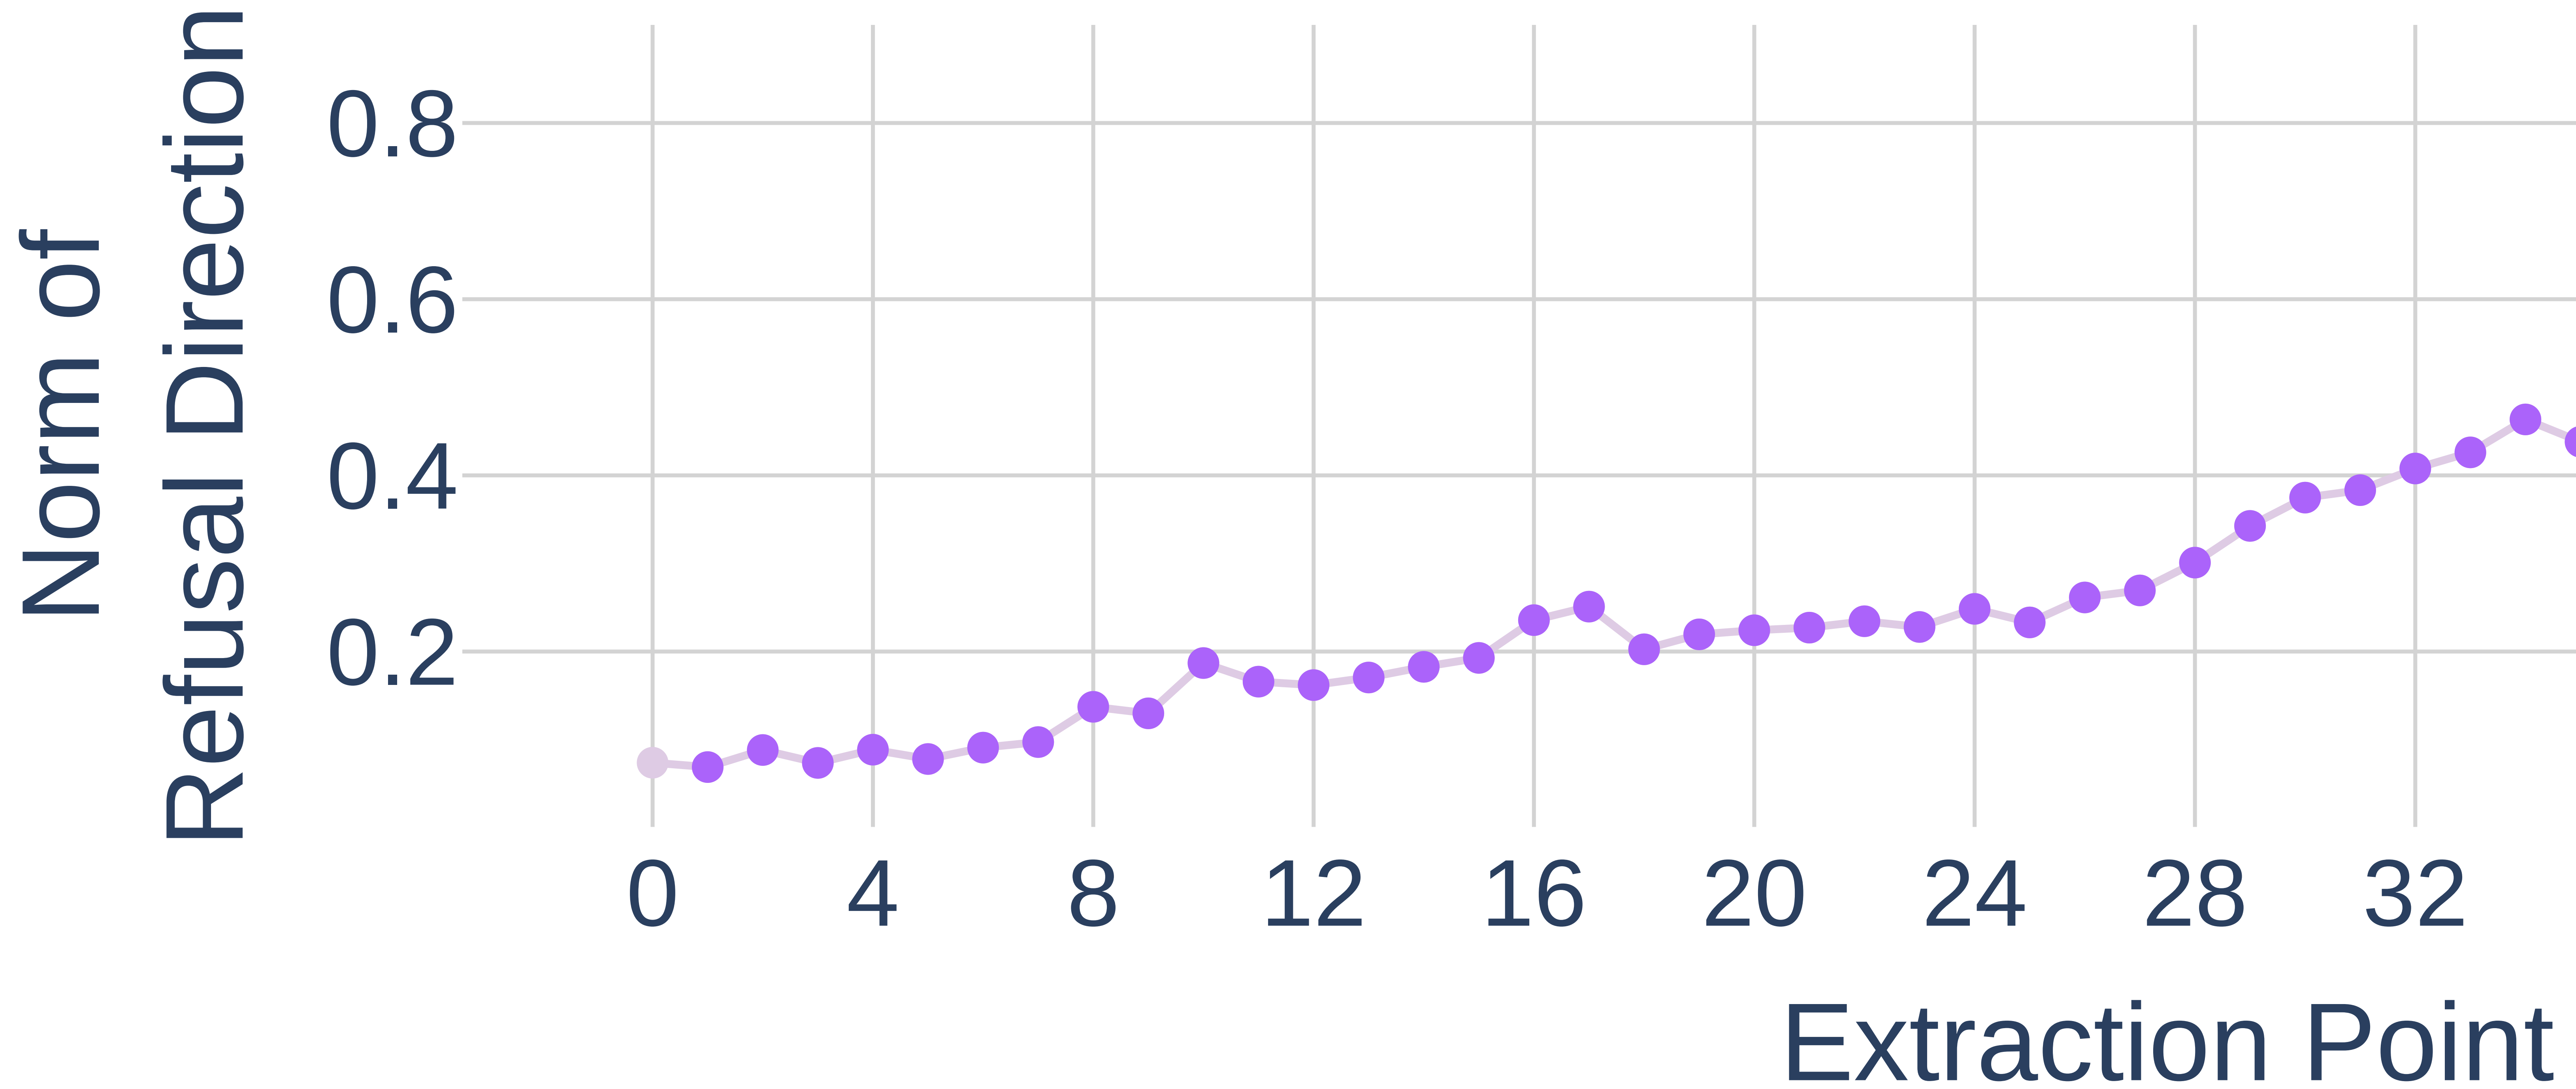

Supplement: supplementary_material [file norm_refusal.pdf › angular_steering/angular_steering/visualization/Qwen2.5-7B-Instruct/norm_refusal.pdf]

Scalar Projections

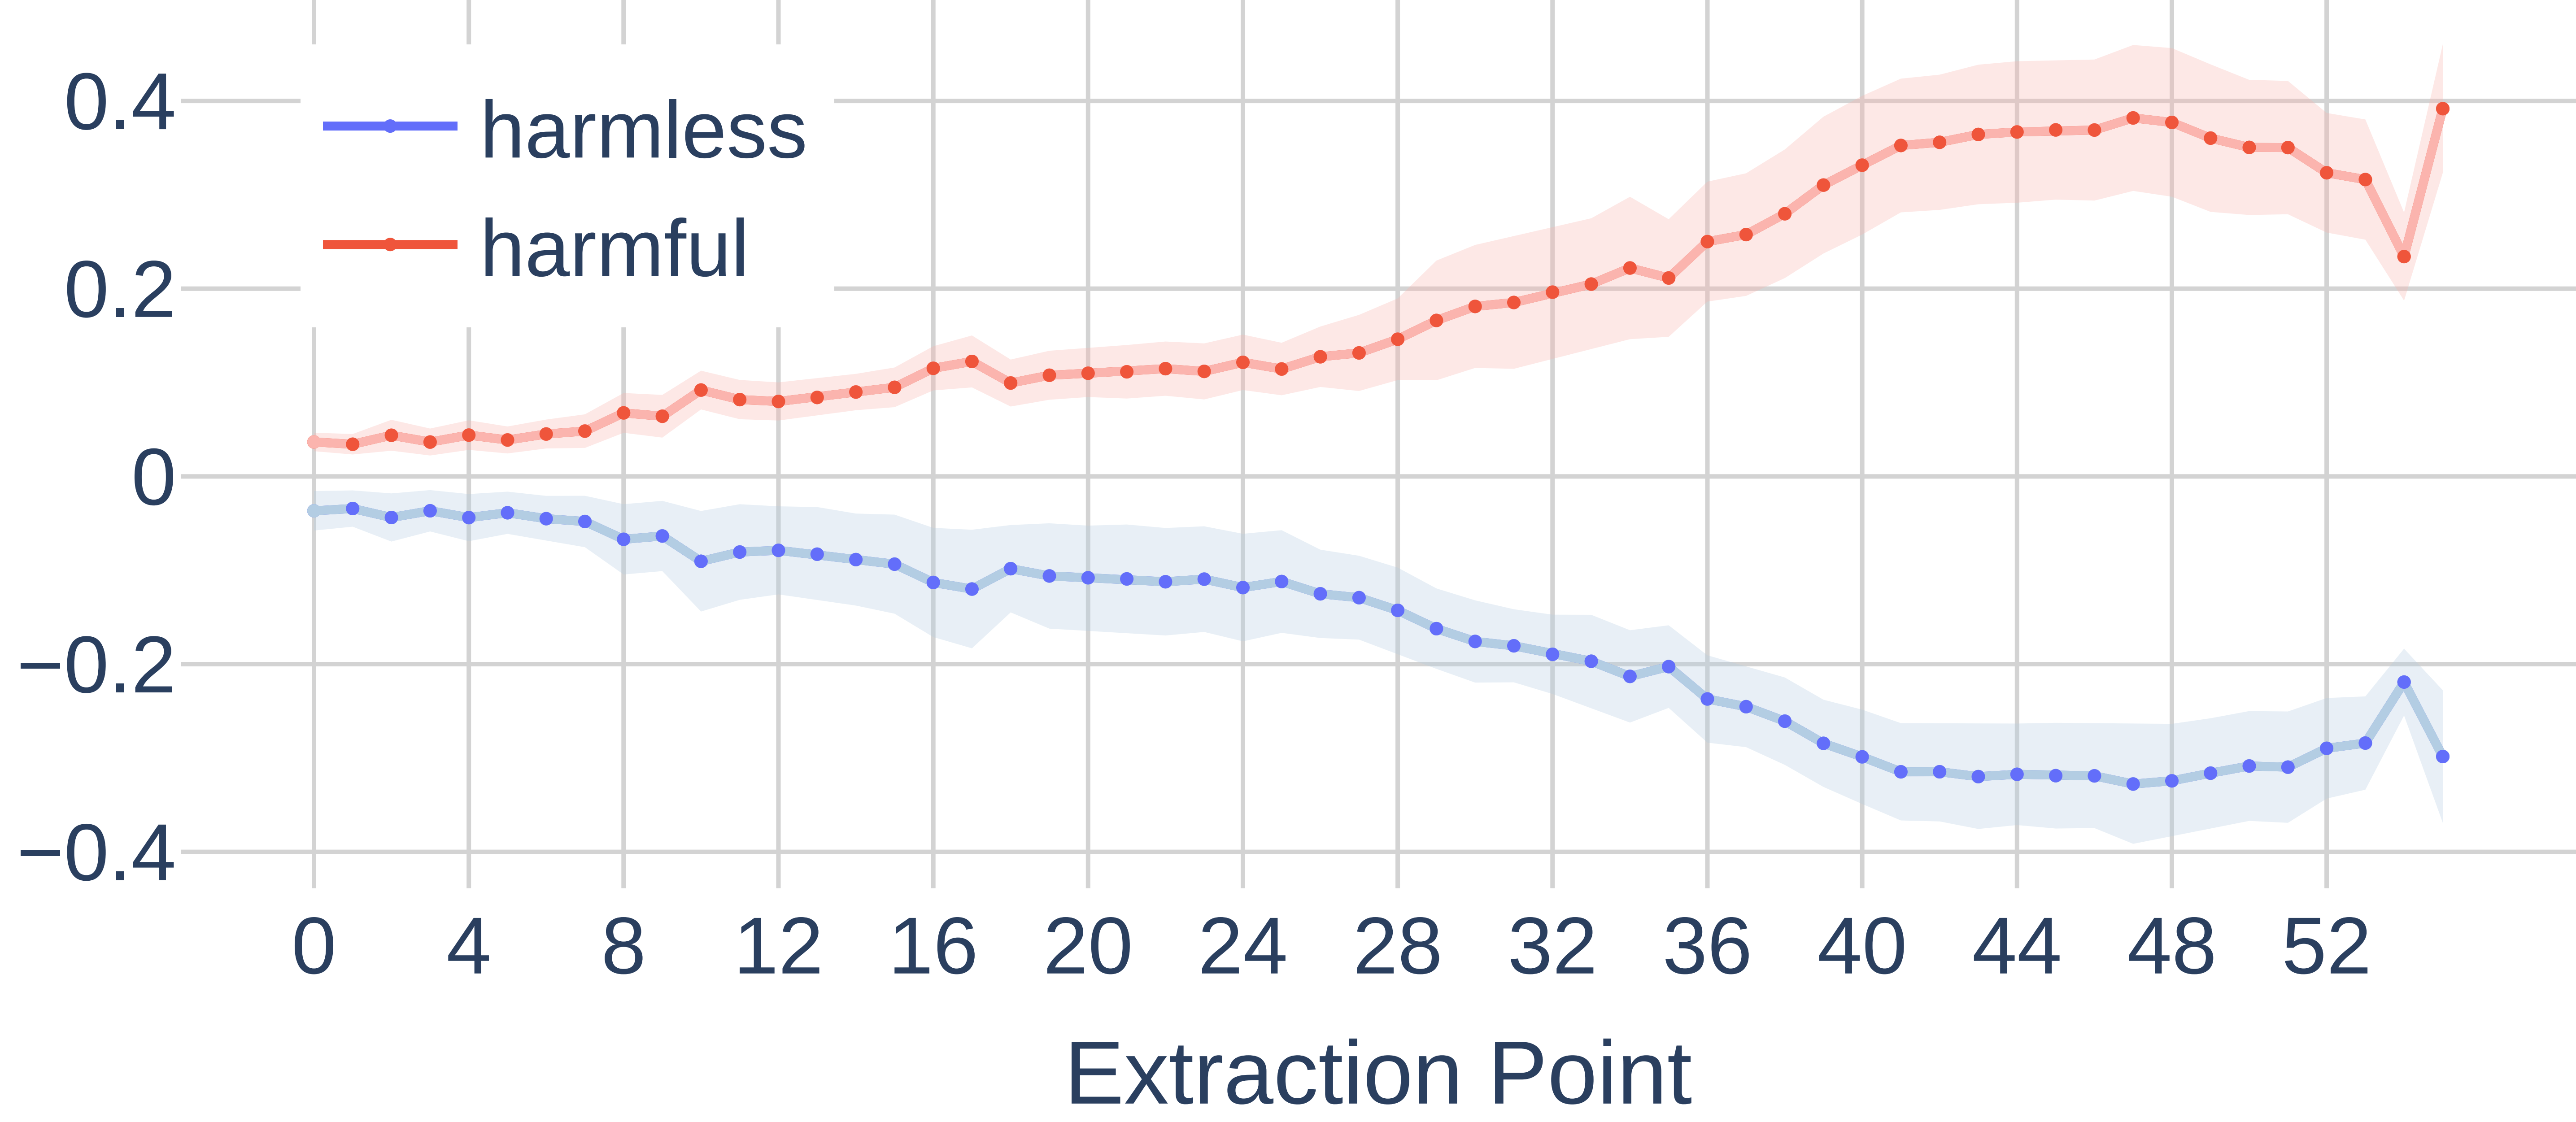

Supplement: supplementary_material [file prj_onto_local_refusal_candidates.pdf › angular_steering/angular_steering/visualization/Qwen2.5-7B-Instruct/prj_onto_local_refusal_candidates.pdf]

Scalar Projections

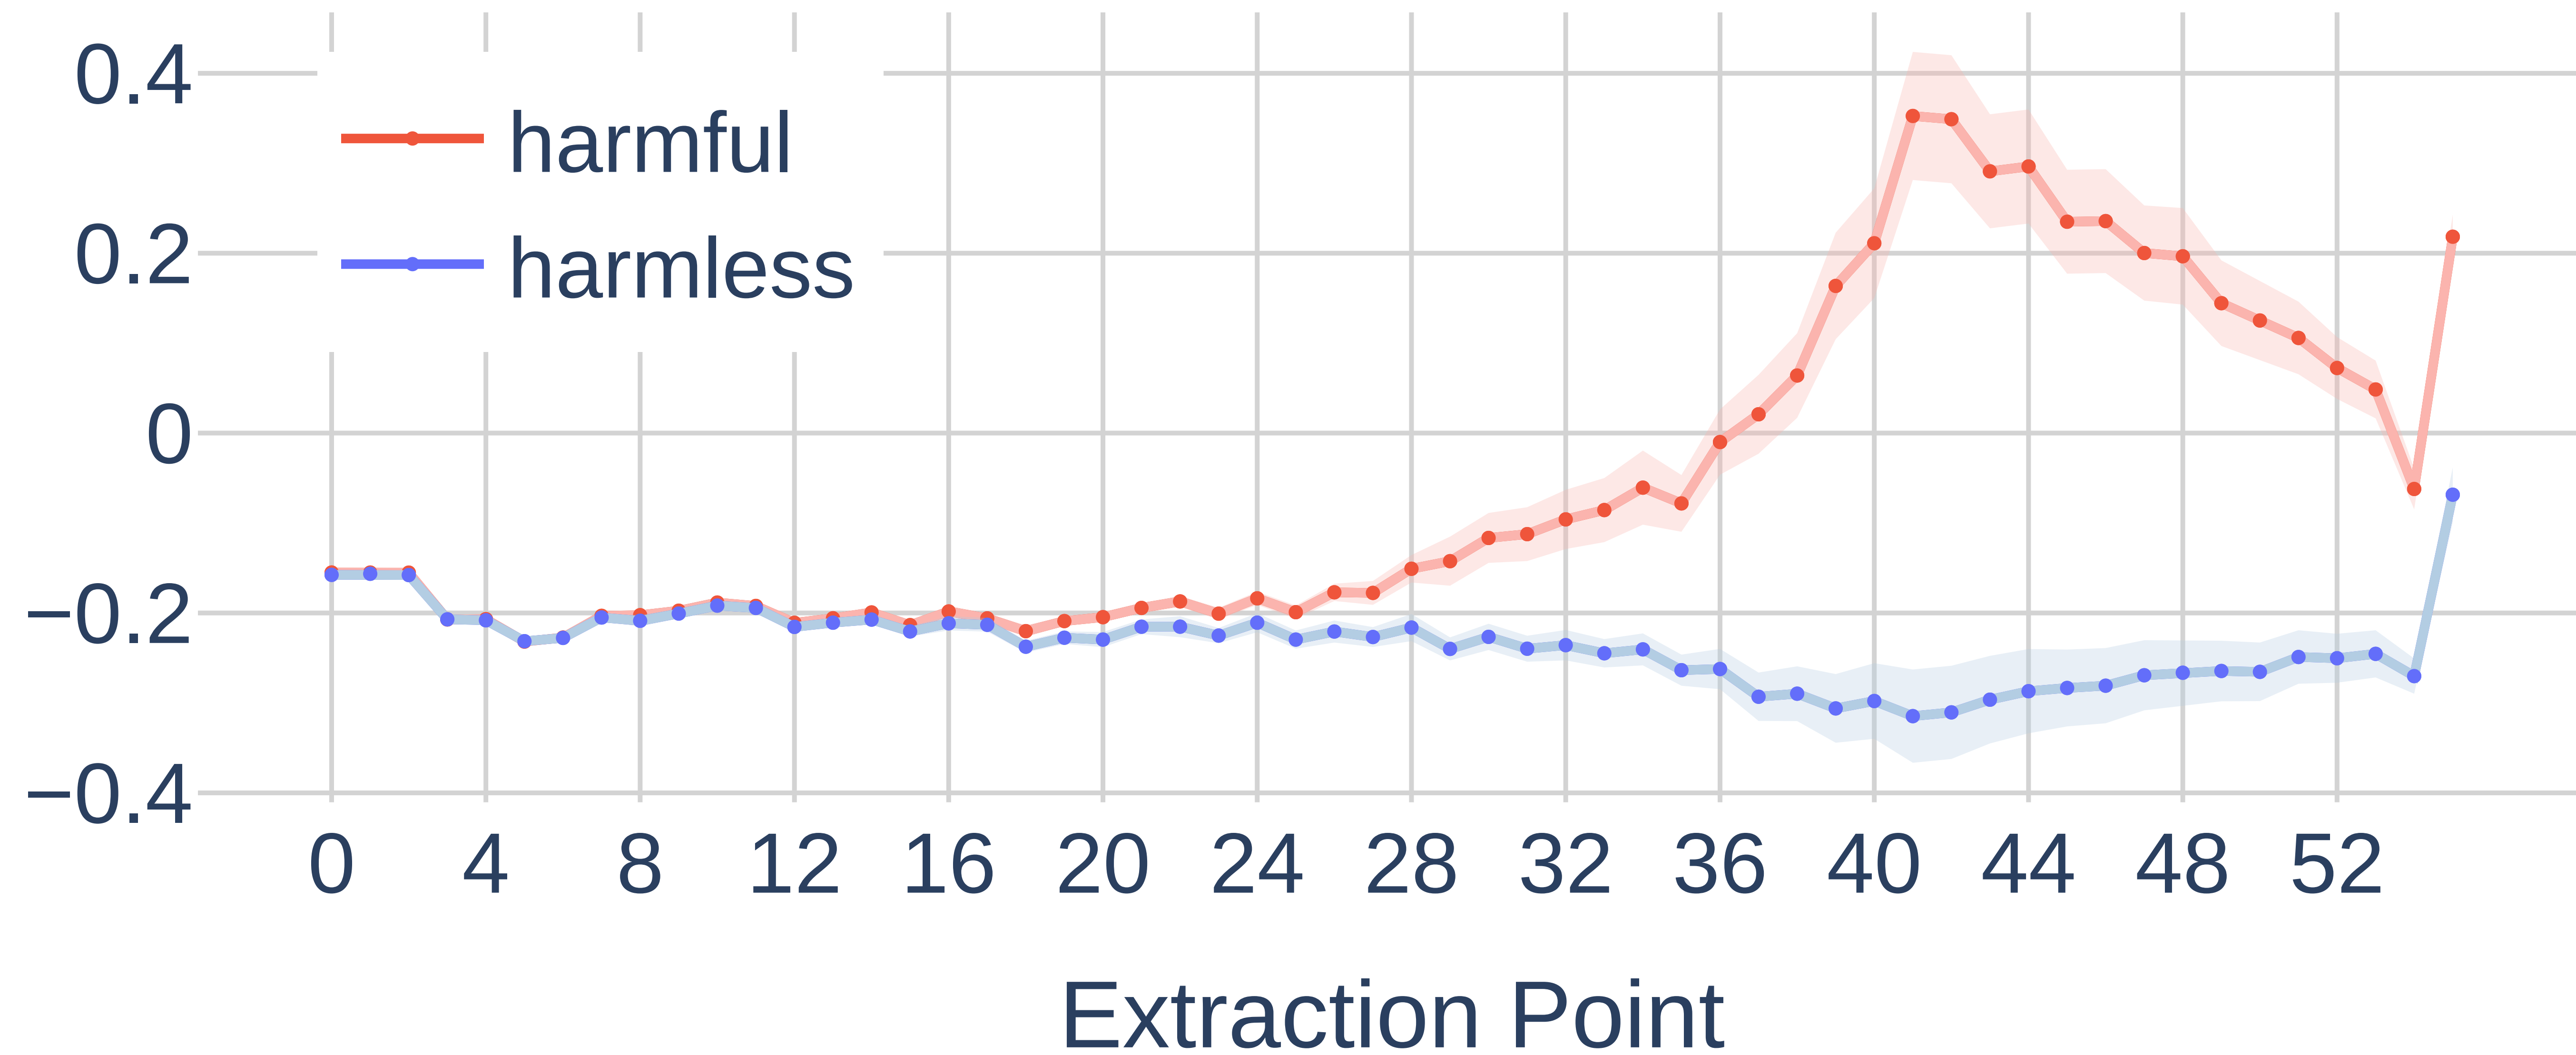

Supplement: supplementary_material [file prj_onto_refusal_dir.pdf › angular_steering/angular_steering/visualization/Qwen2.5-7B-Instruct/prj_onto_refusal_dir.pdf]

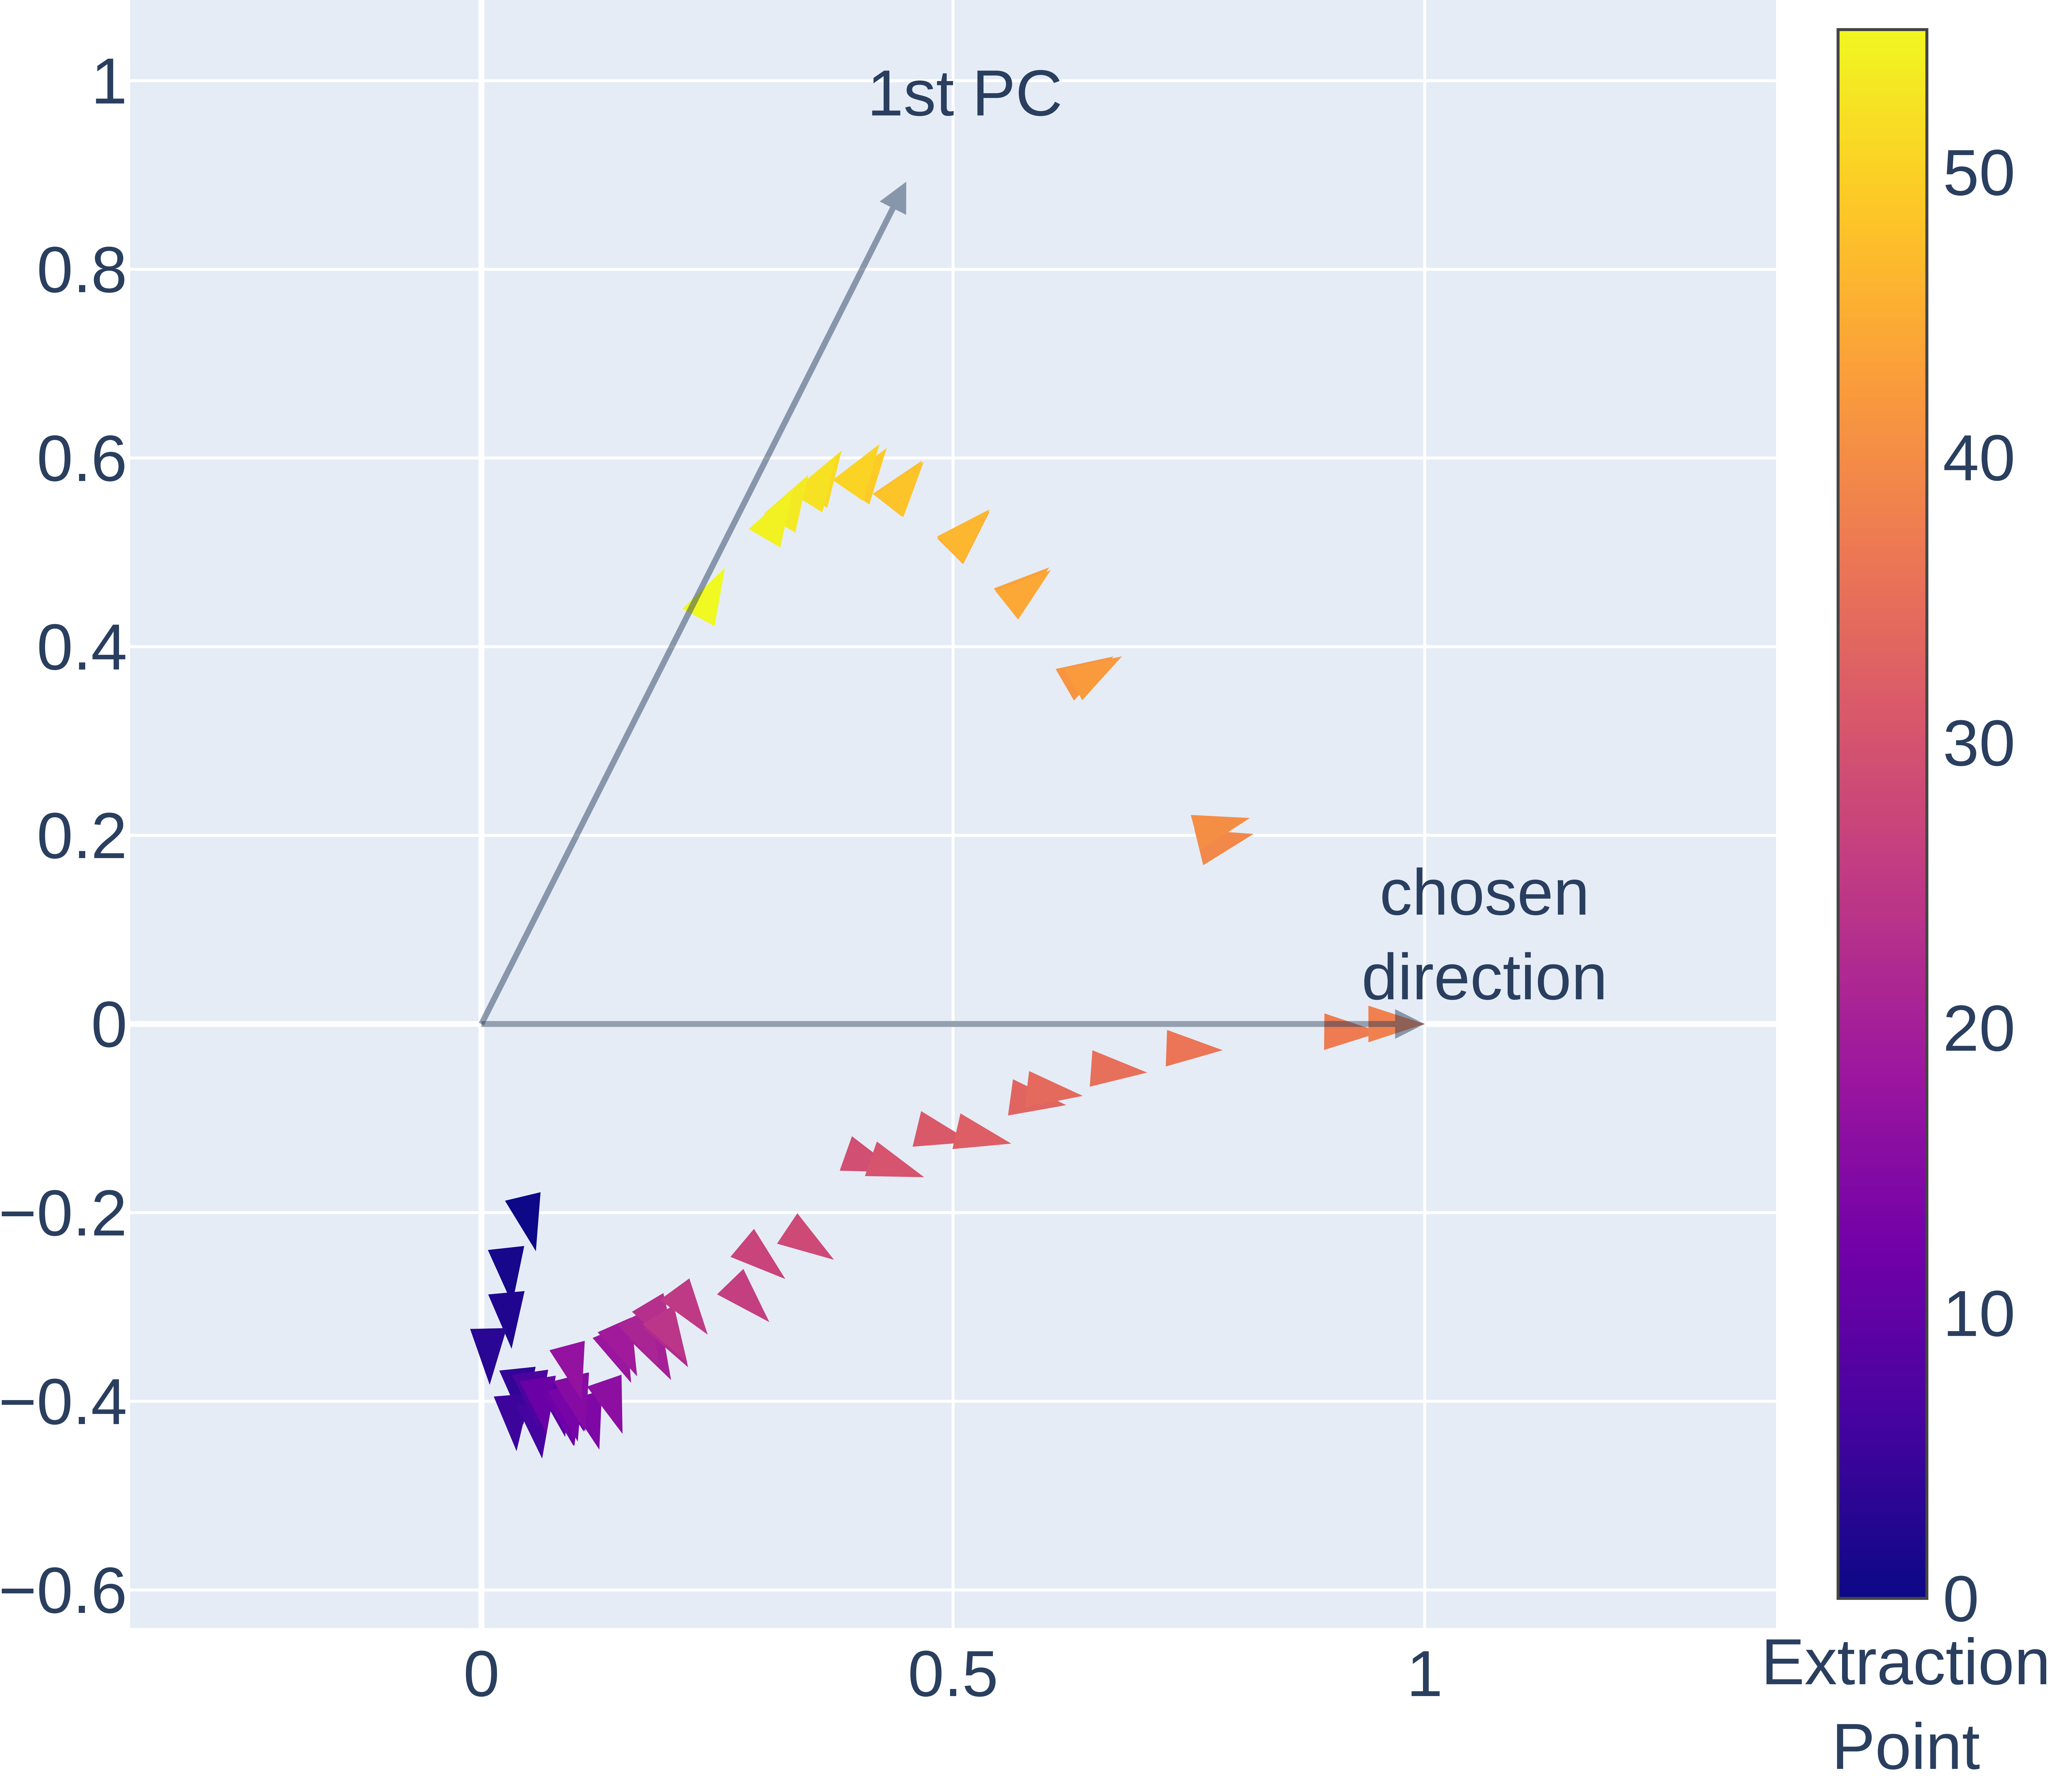

Supplement: supplementary_material [file steering_plane.pdf › angular_steering/angular_steering/visualization/Qwen2.5-7B-Instruct/steering_plane.pdf]

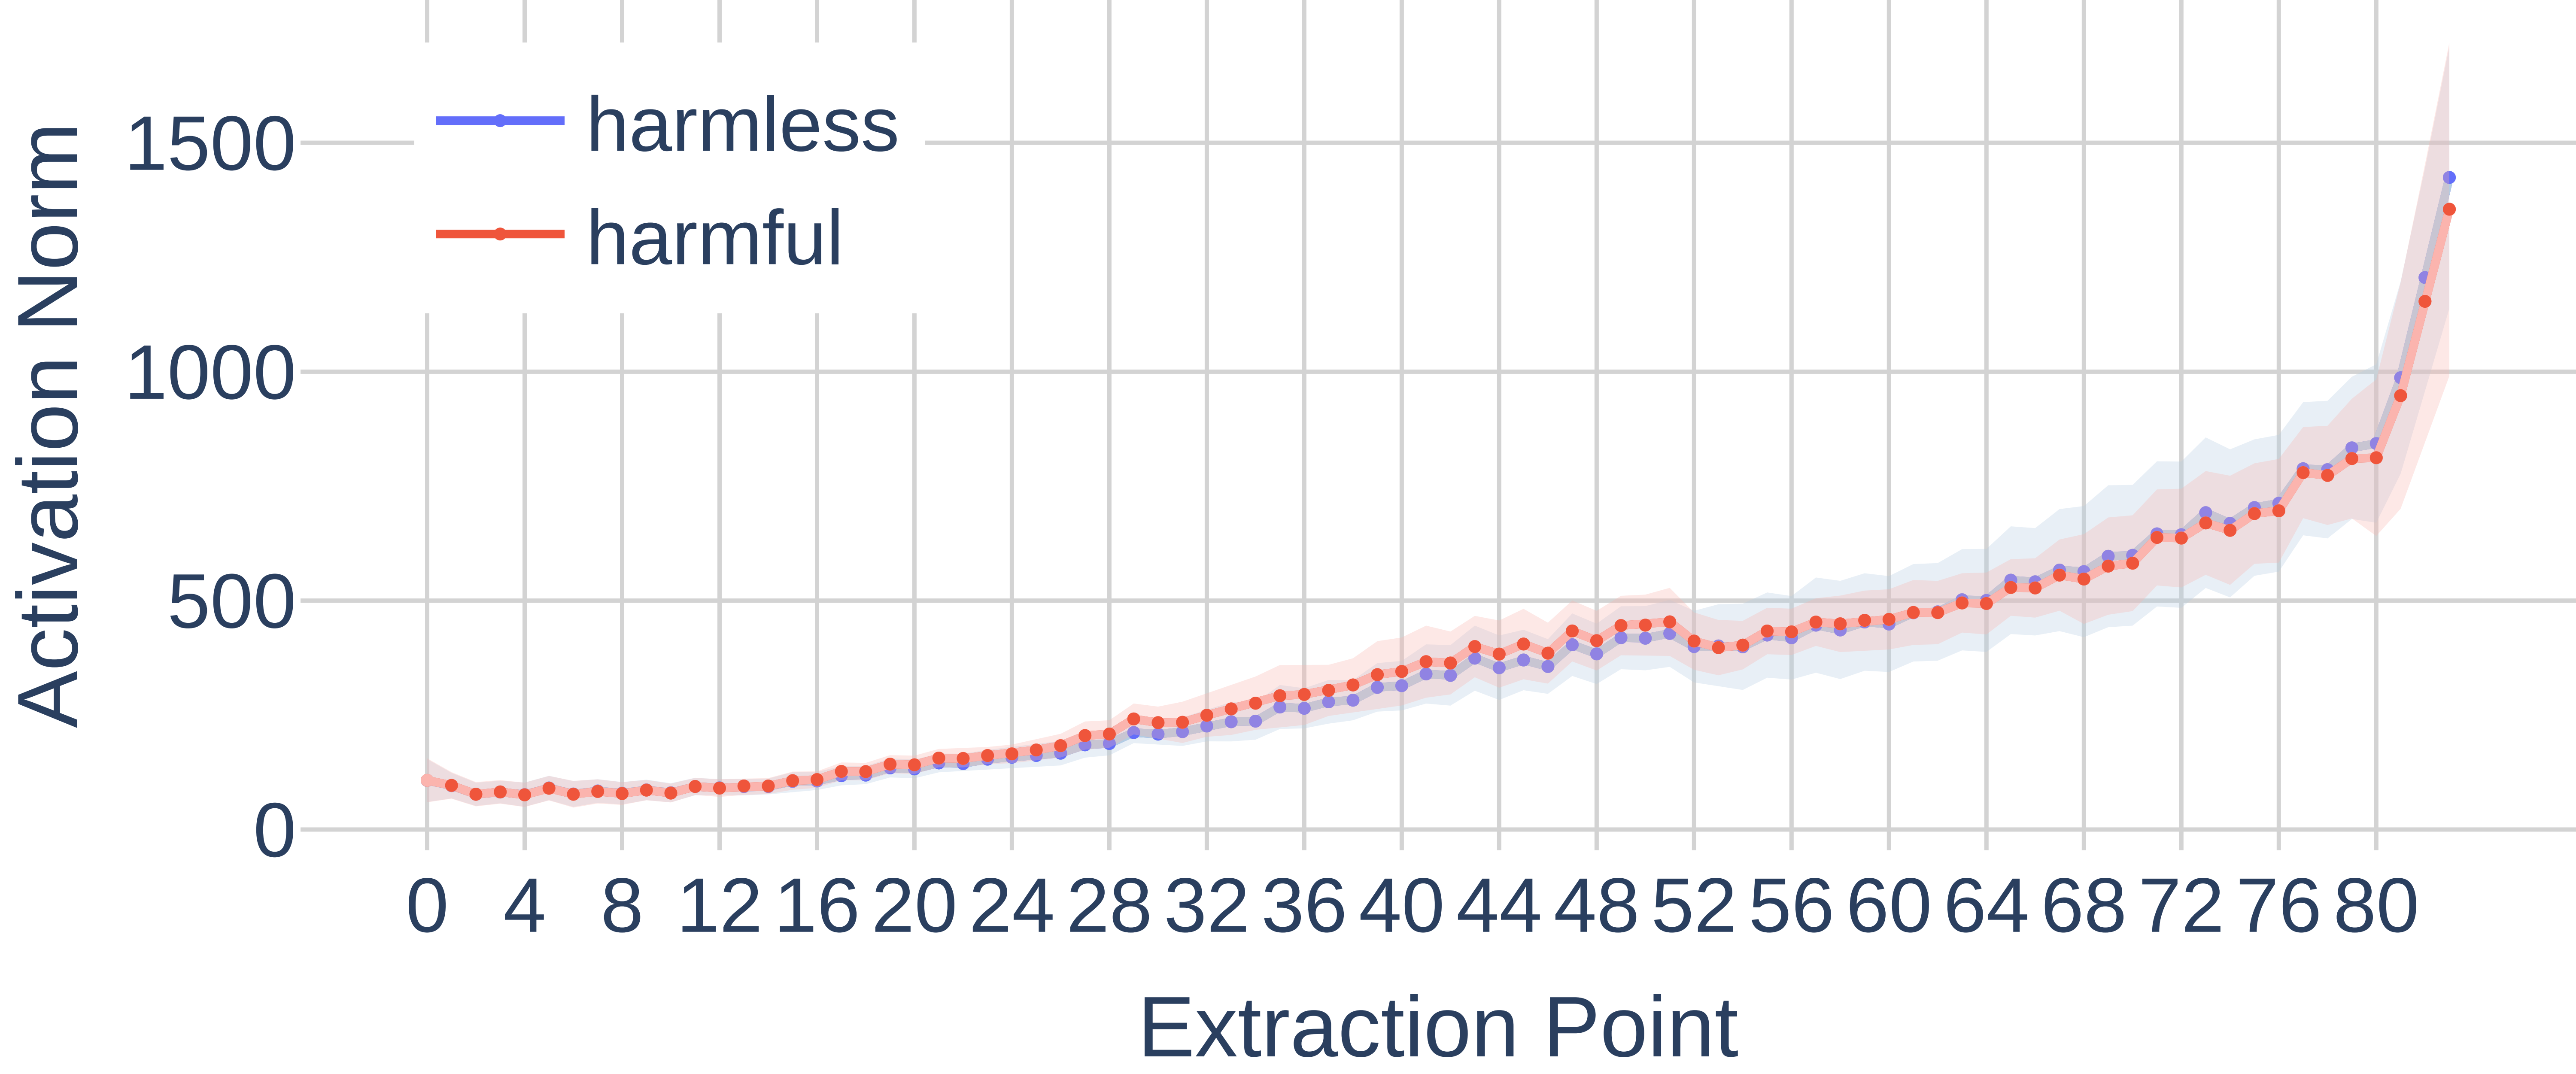

Supplement: supplementary_material [file acts_norm.pdf › angular_steering/angular_steering/visualization/gemma-2-9b-it/acts_norm.pdf]

Mean

Cosine Score

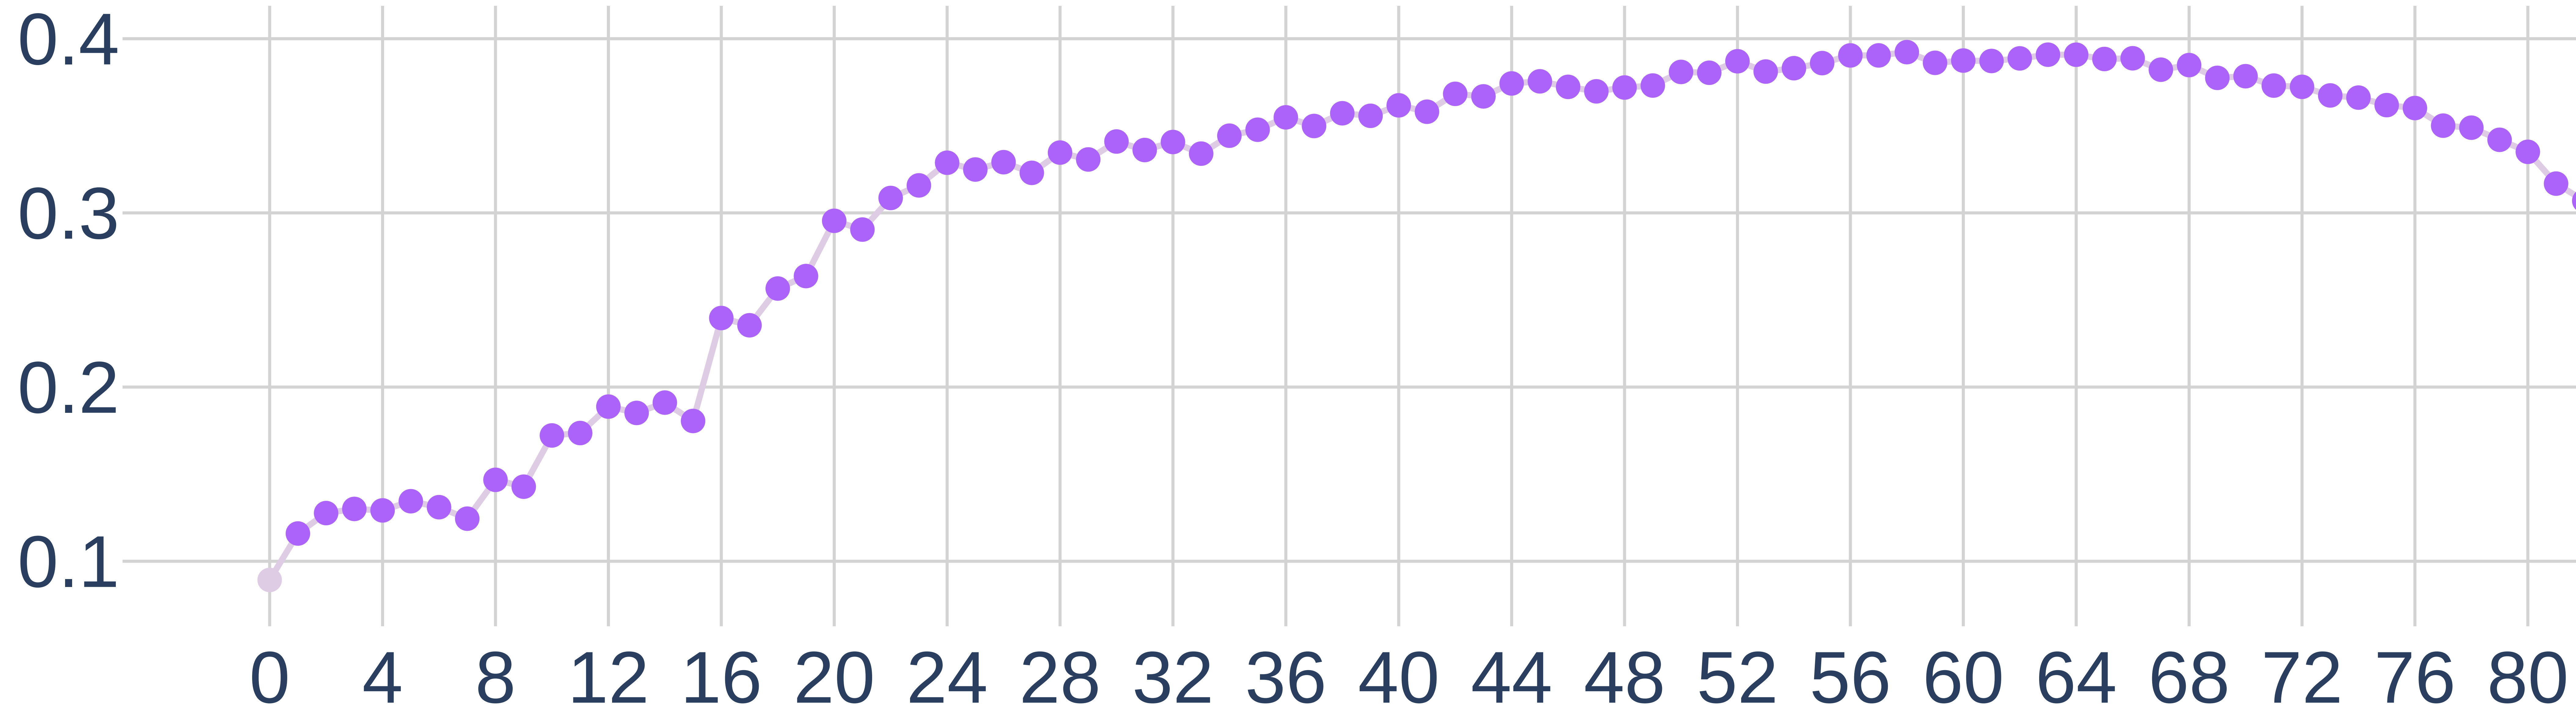

Extraction Point

Supplement: supplementary_material [file mean_cosine.pdf › angular_steering/angular_steering/visualization/gemma-2-9b-it/mean_cosine.pdf]

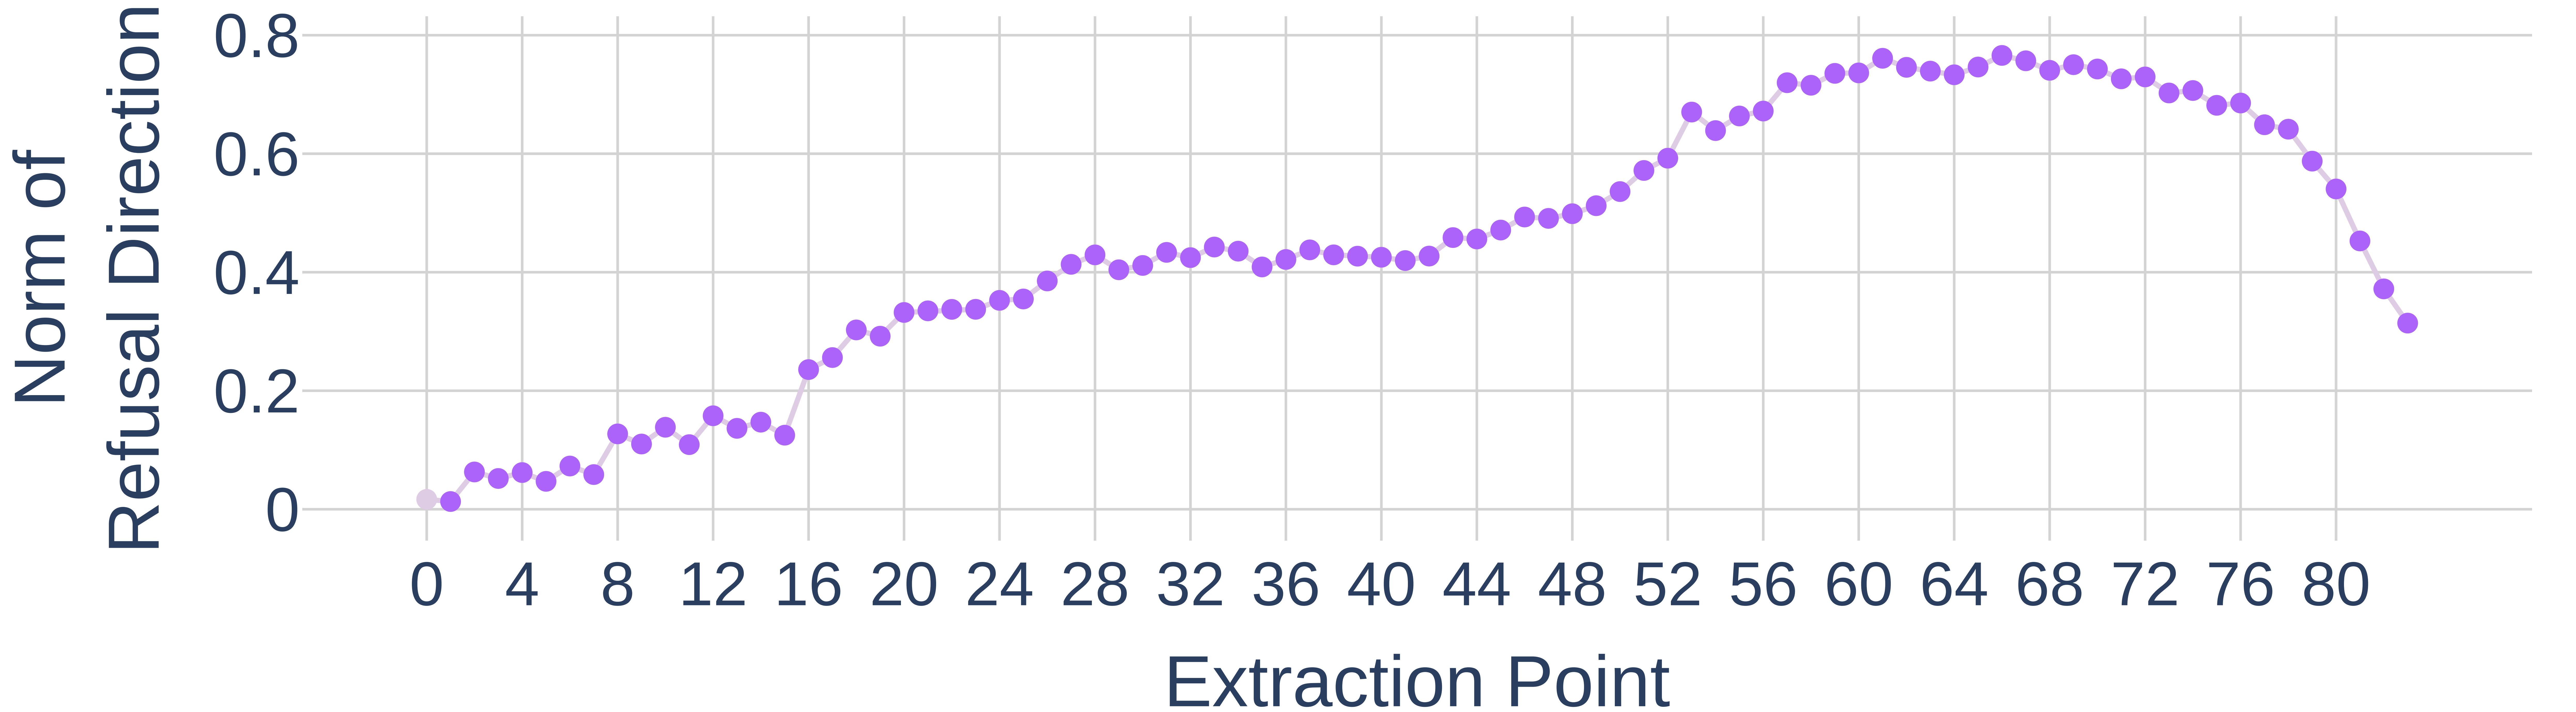

Supplement: supplementary_material [file norm_refusal.pdf › angular_steering/angular_steering/visualization/gemma-2-9b-it/norm_refusal.pdf]

Scalar Projections

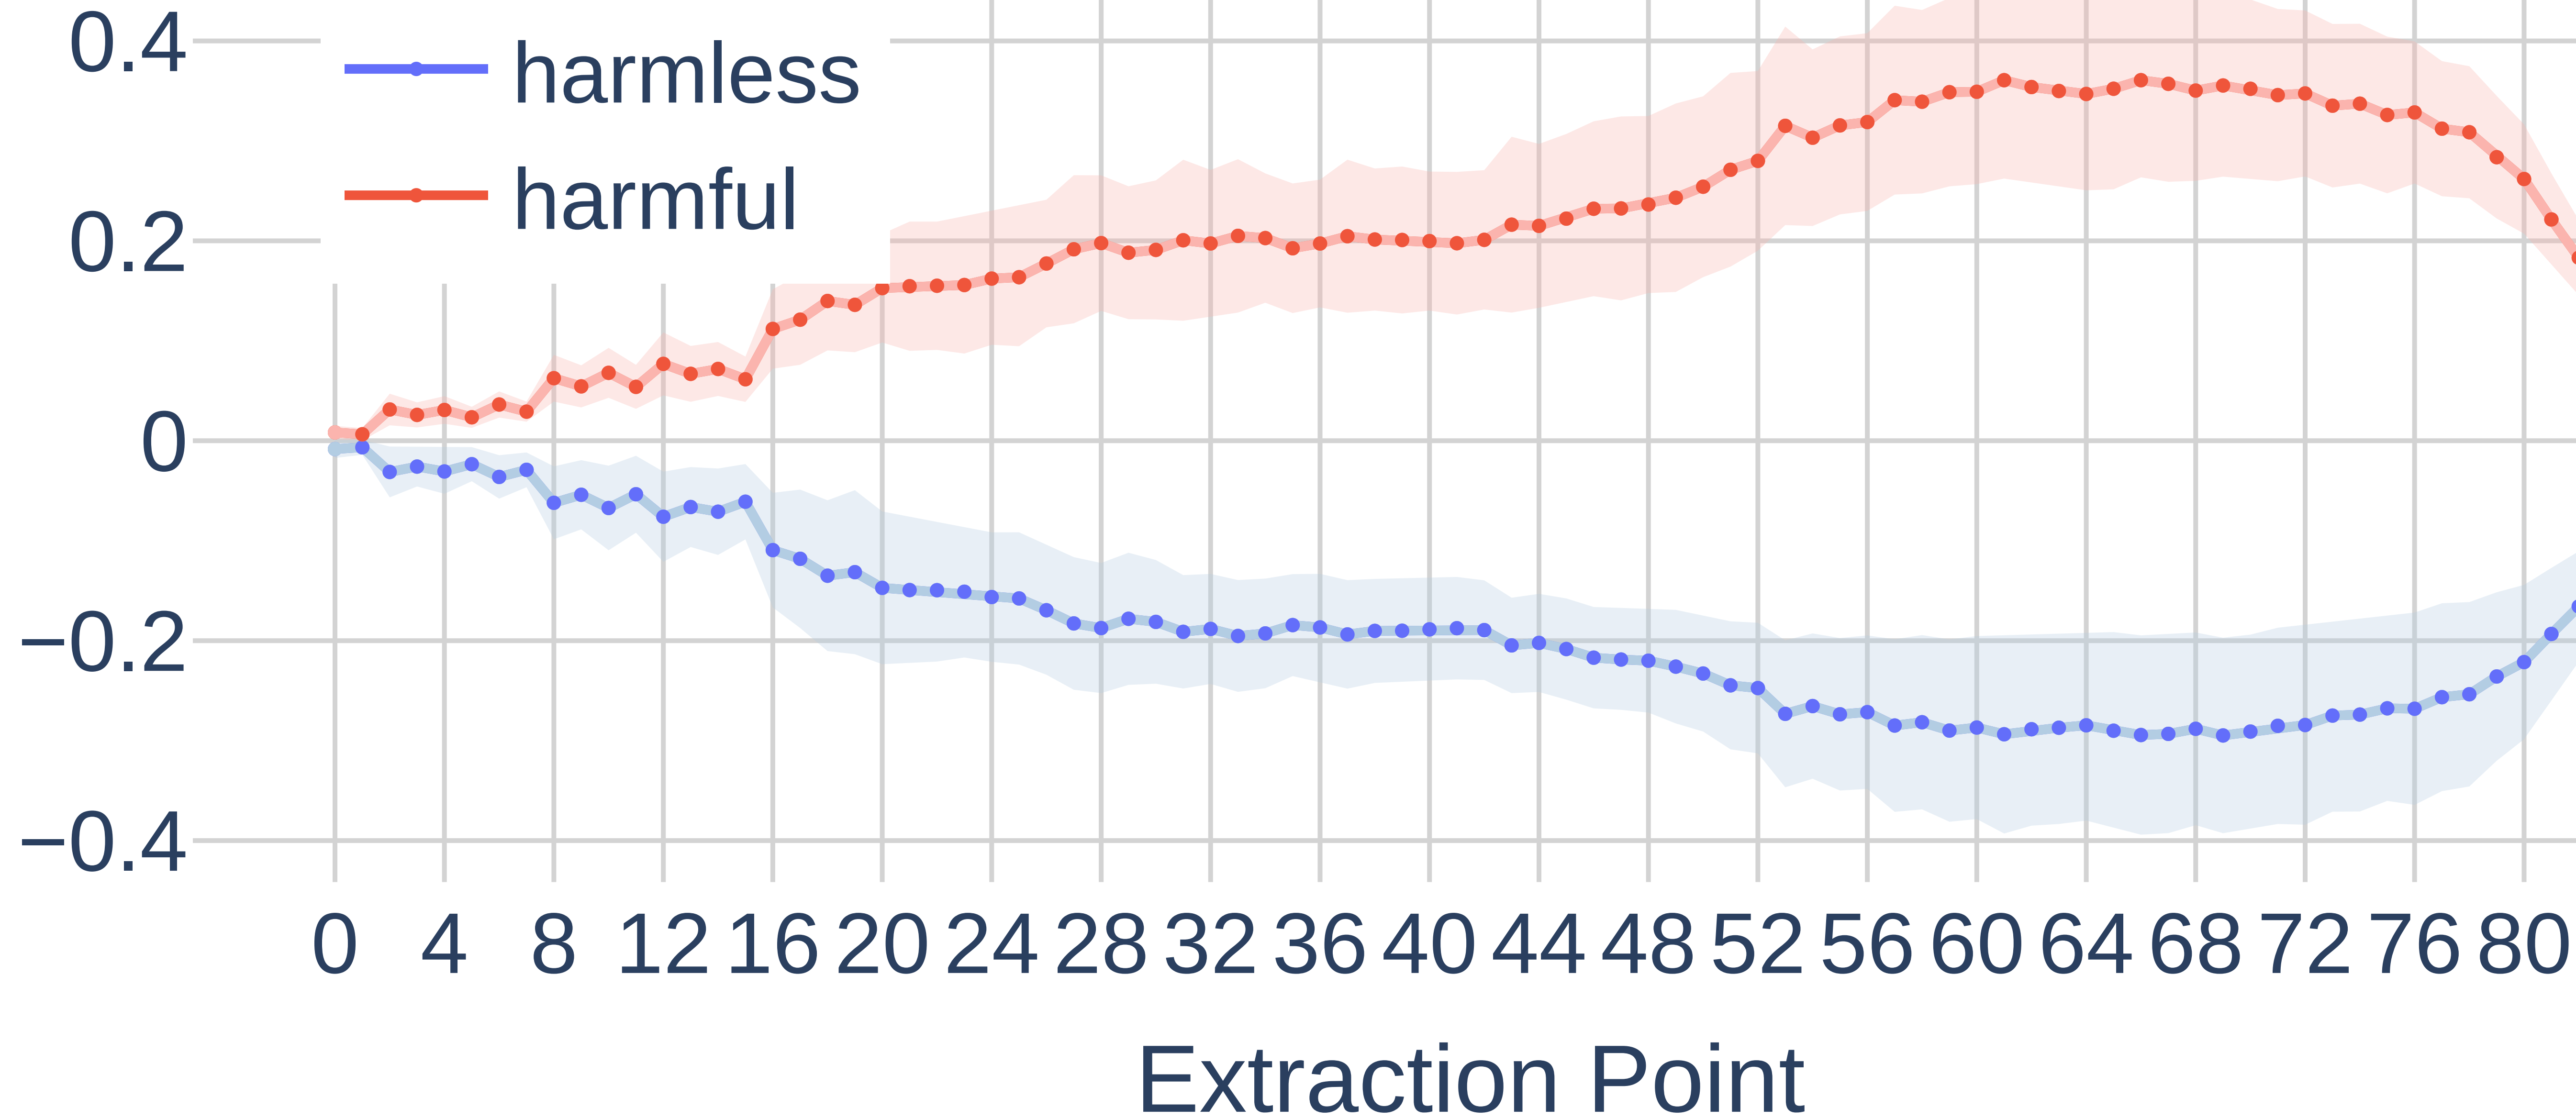

Supplement: supplementary_material [file prj_onto_local_refusal_candidates.pdf › angular_steering/angular_steering/visualization/gemma-2-9b-it/prj_onto_local_refusal_candidates.pdf]

Scalar Projections

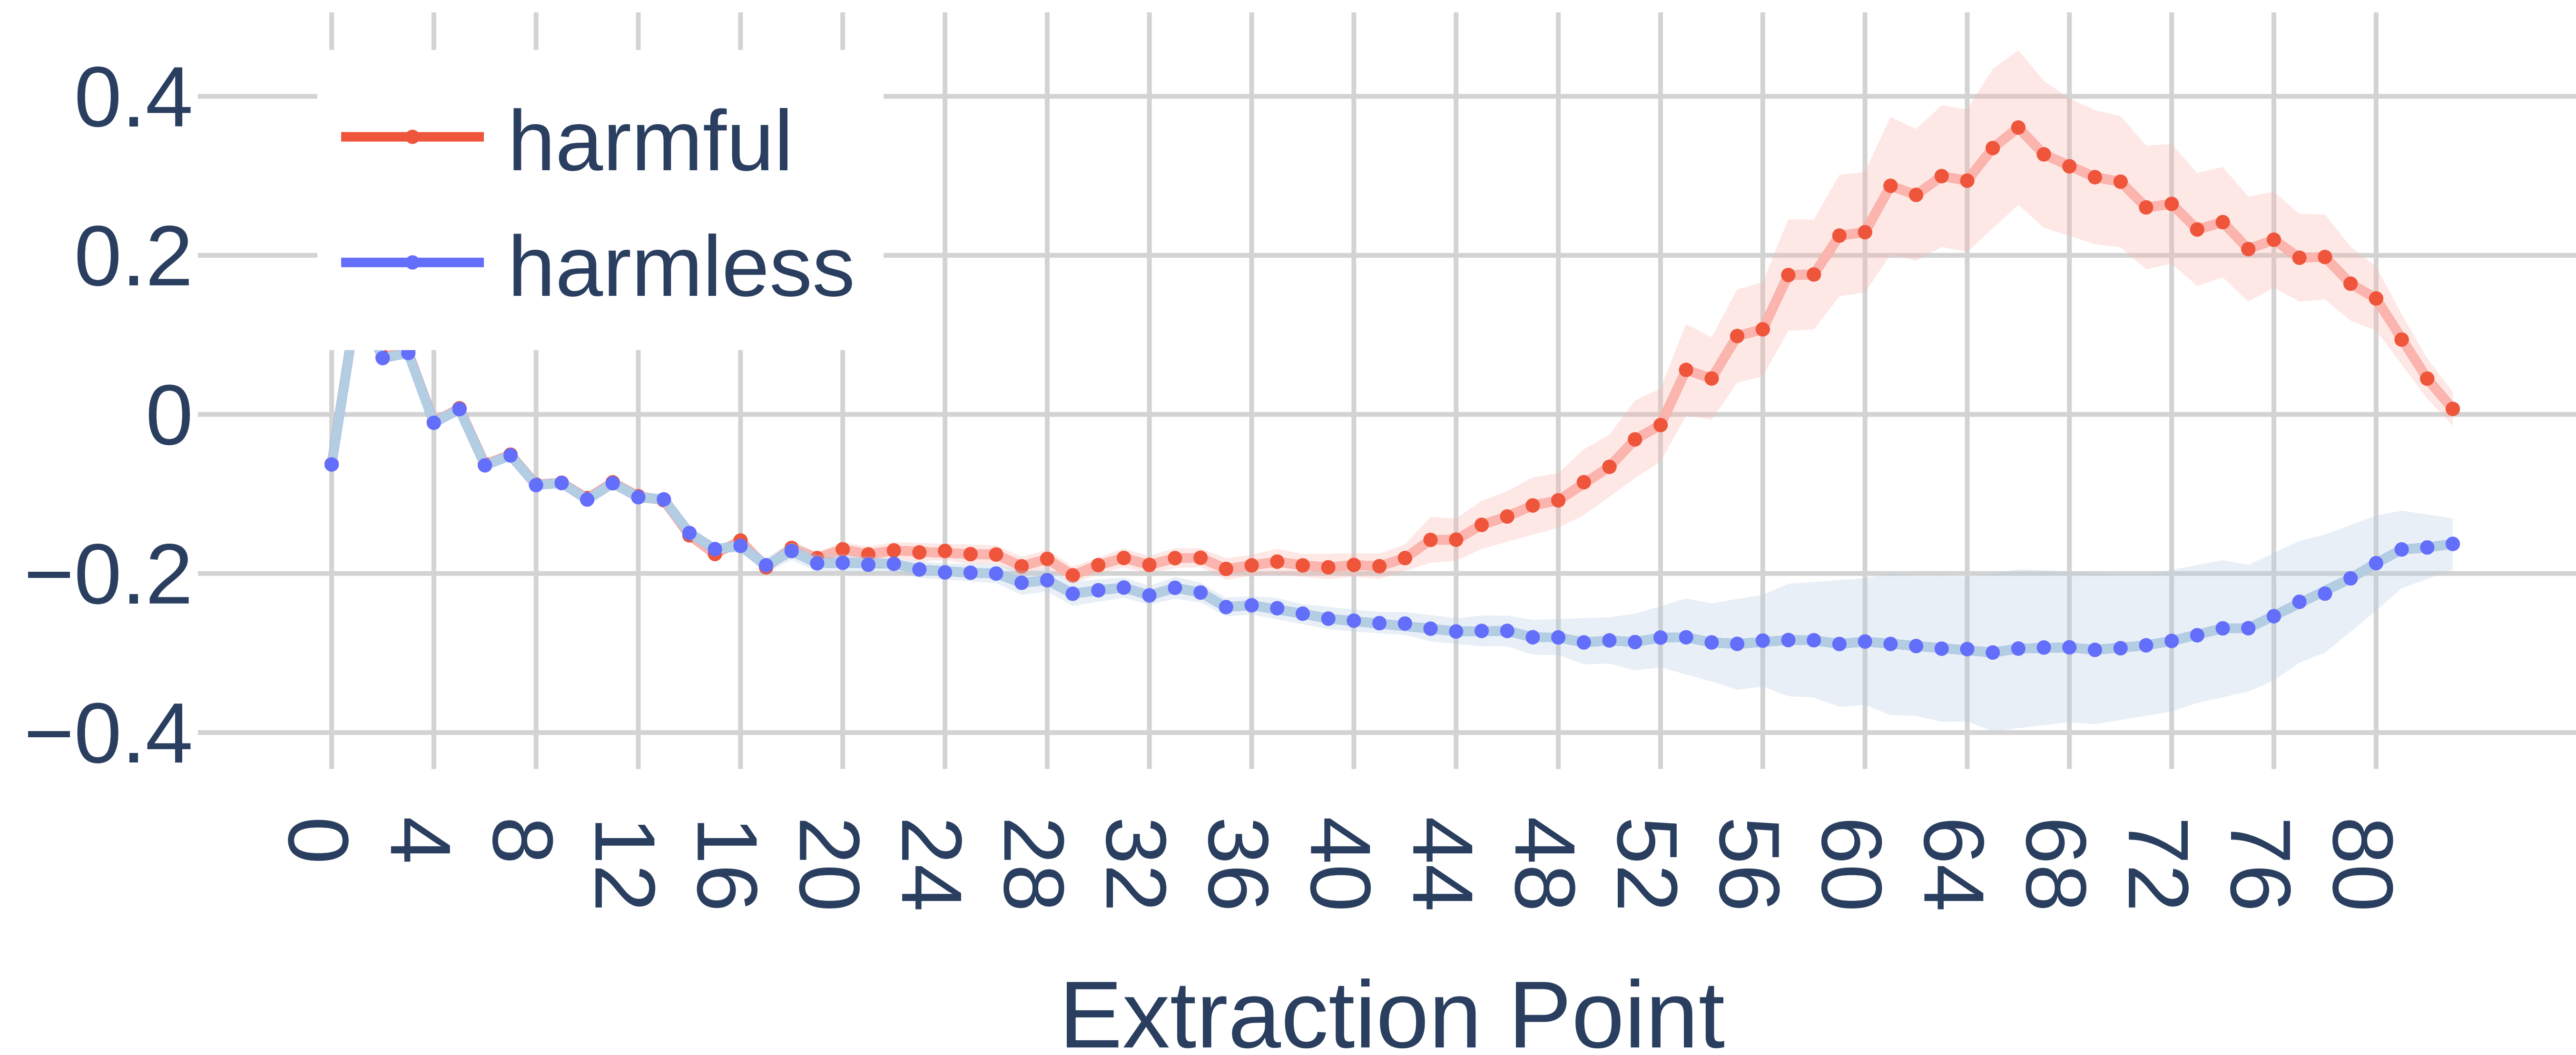

Supplement: supplementary_material [file prj_onto_refusal_dir.pdf › angular_steering/angular_steering/visualization/gemma-2-9b-it/prj_onto_refusal_dir.pdf]

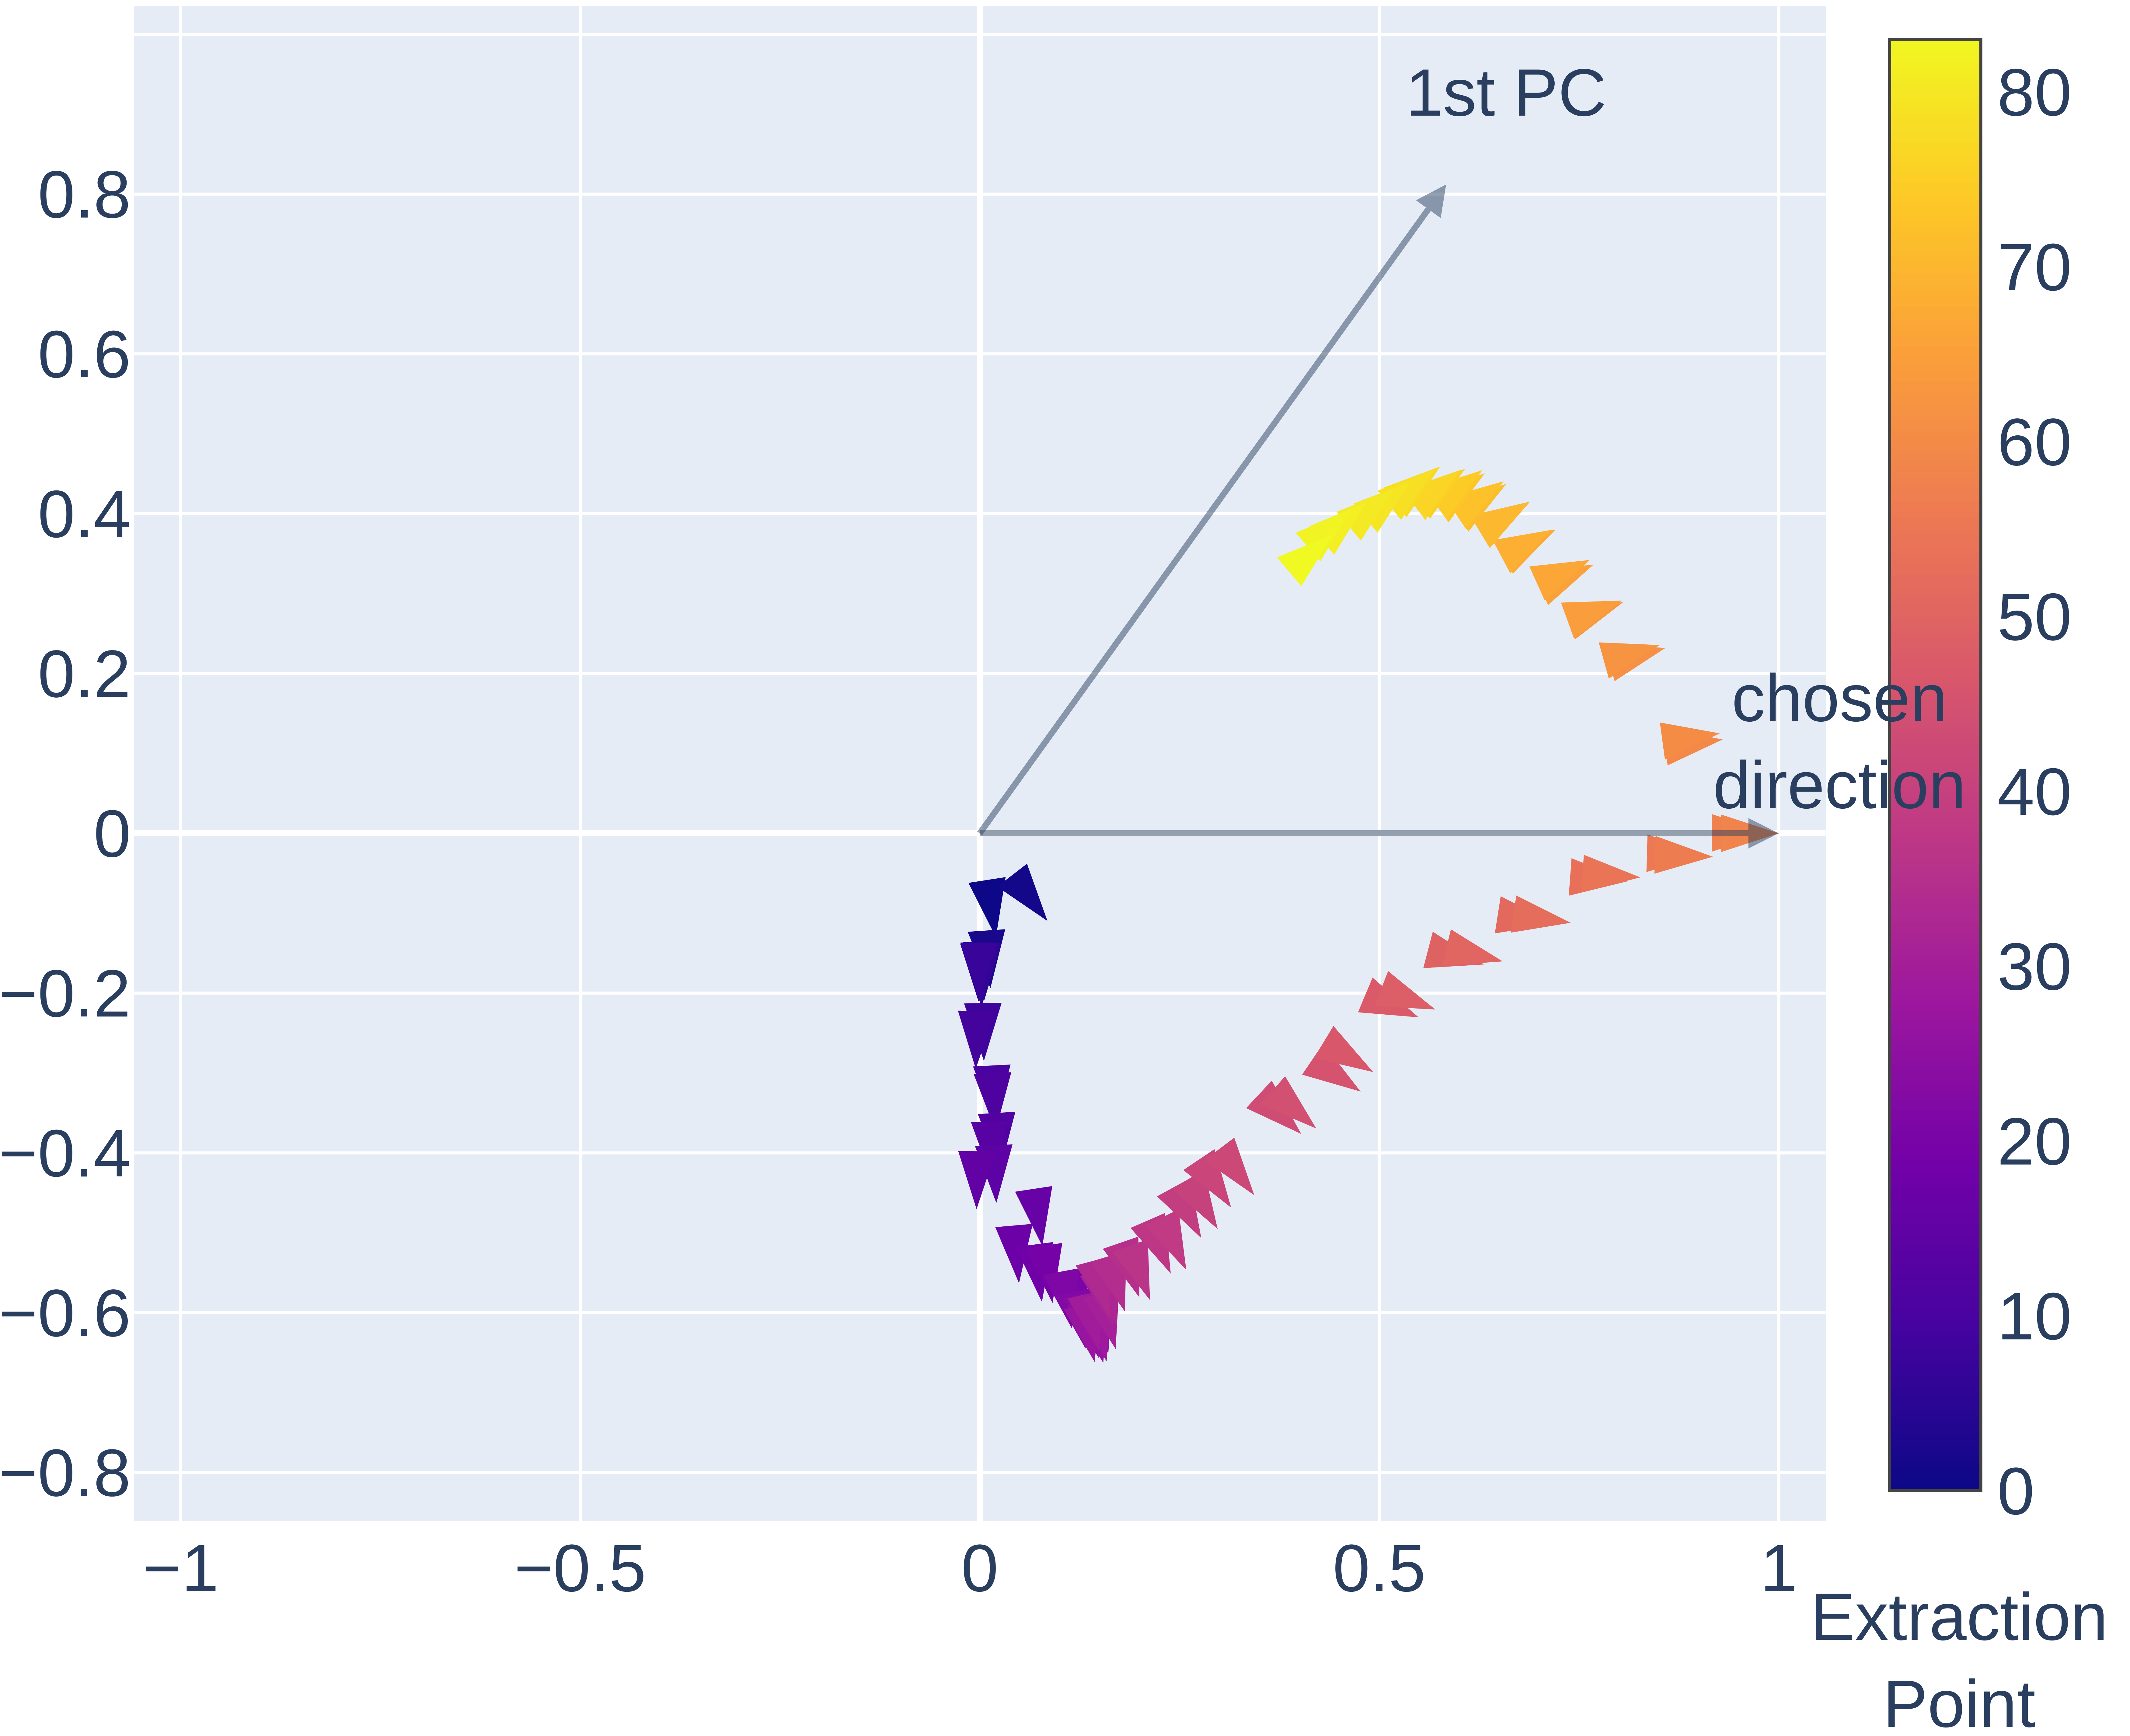

Supplement: supplementary_material [file steering_plane.pdf › angular_steering/angular_steering/visualization/gemma-2-9b-it/steering_plane.pdf]
